# Supplementary material
Source: Research Square preprint supplement (doi:10.21203/rs.3.rs-9288348/v1)

# Uncropped original Western blot image corresponding to Figure 1M

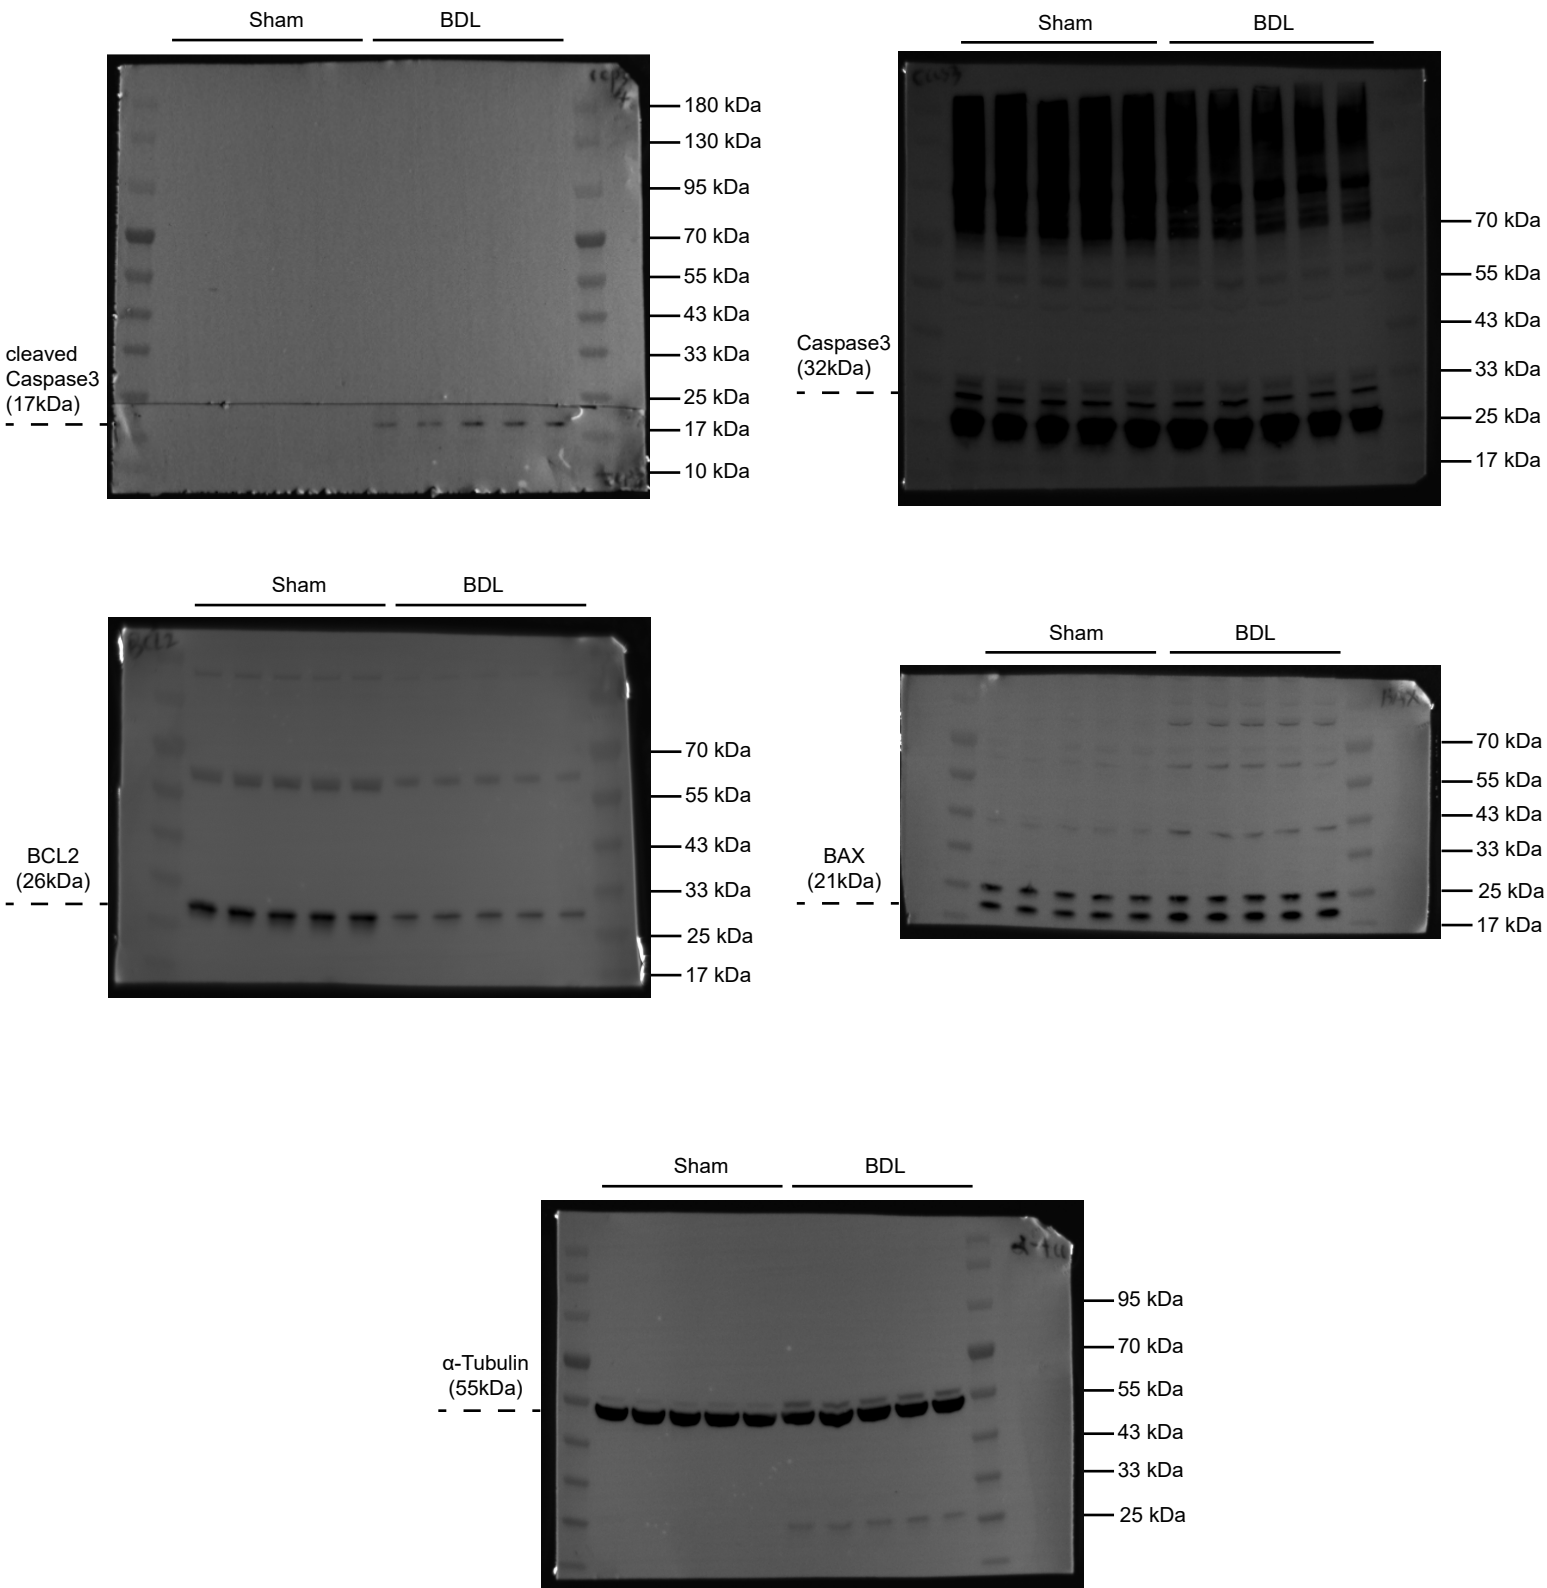

# Uncropped original Western blot image corresponding to Figure 2C

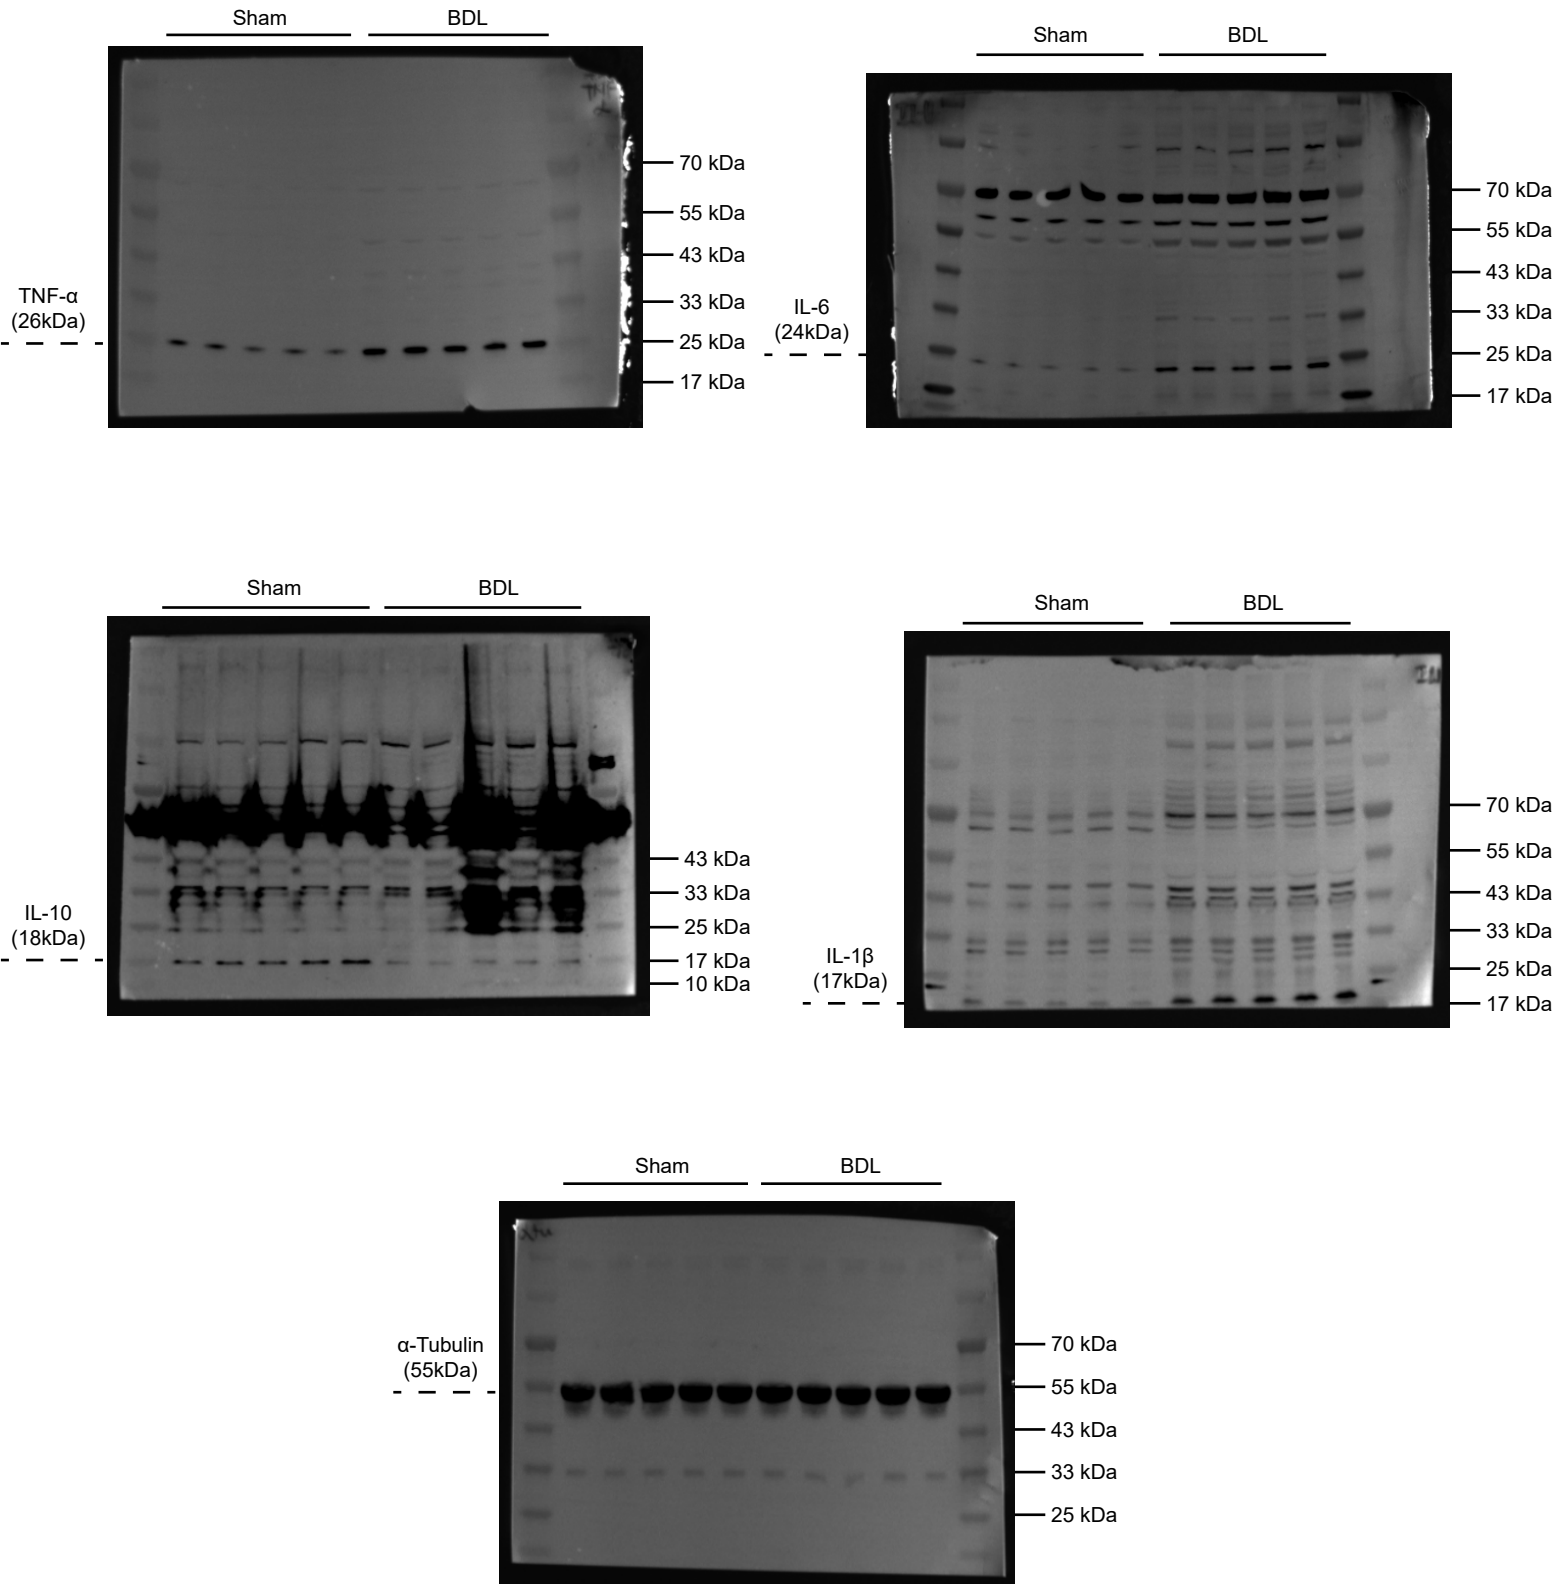

# Uncropped original Western blot image corresponding to Figure S2B

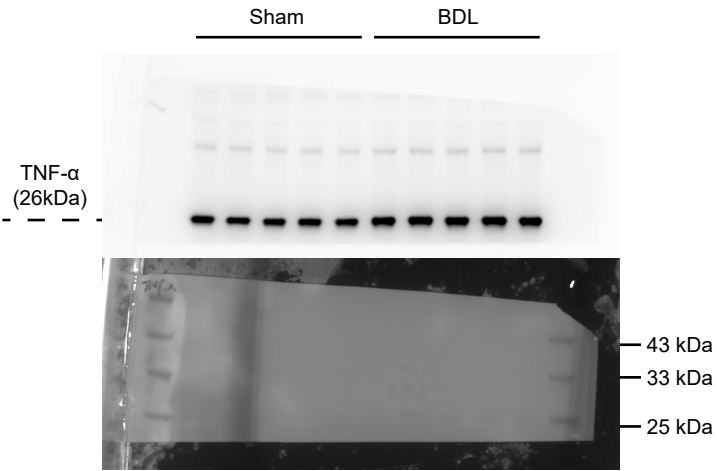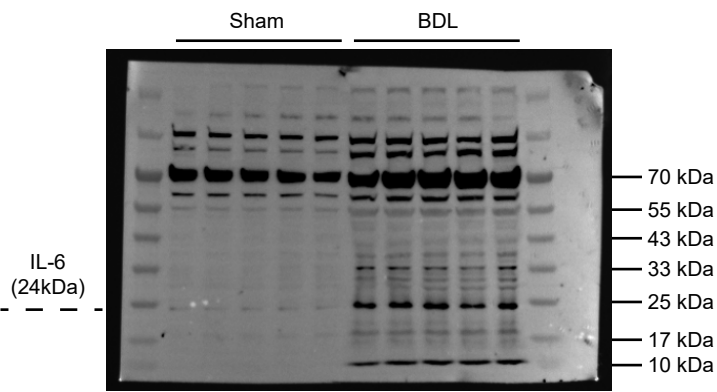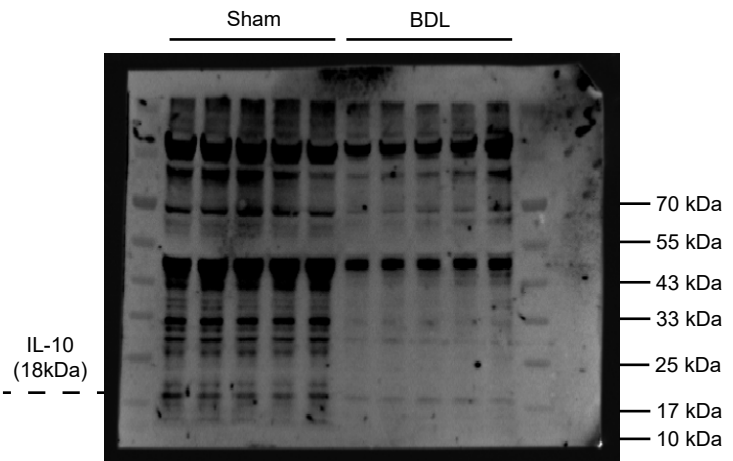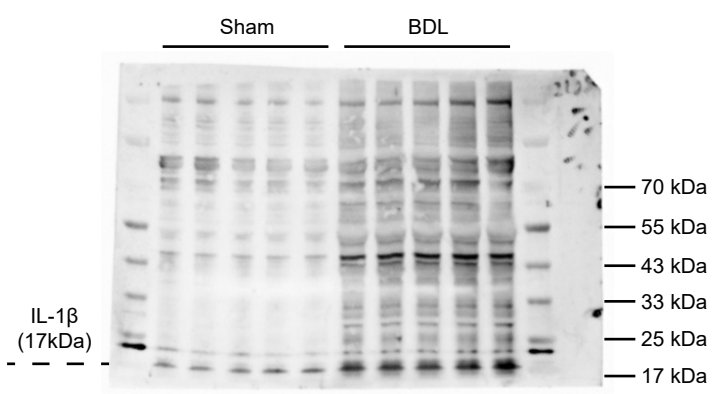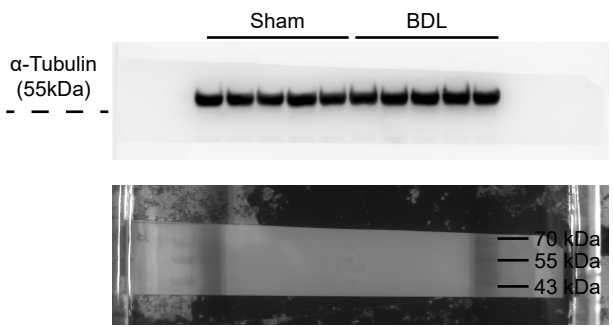

# Uncropped original Western blot image corresponding to Figure 3A

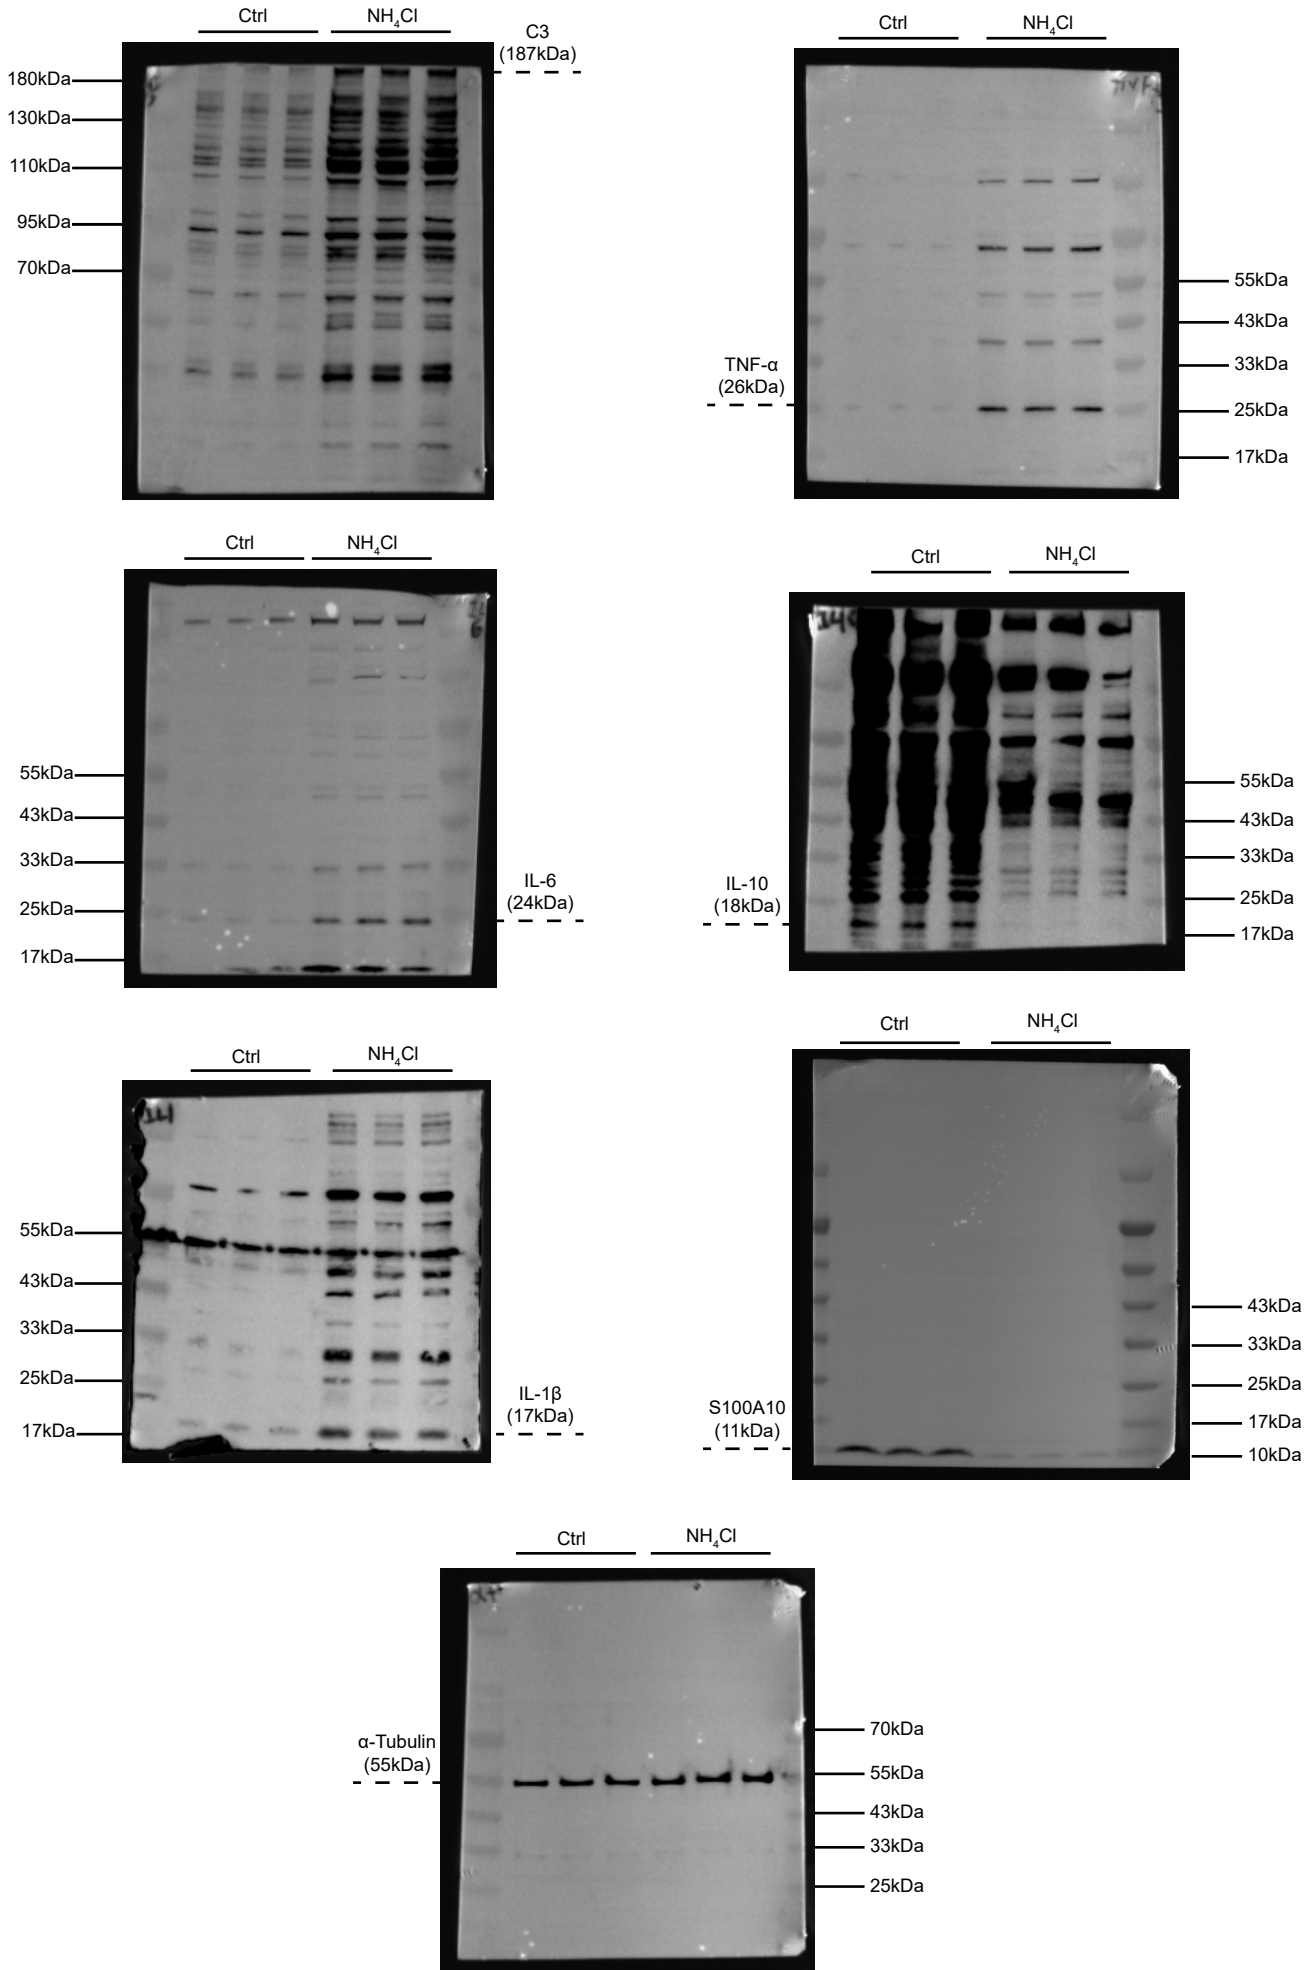

# Uncropped original Western blot image corresponding to Figure S3A

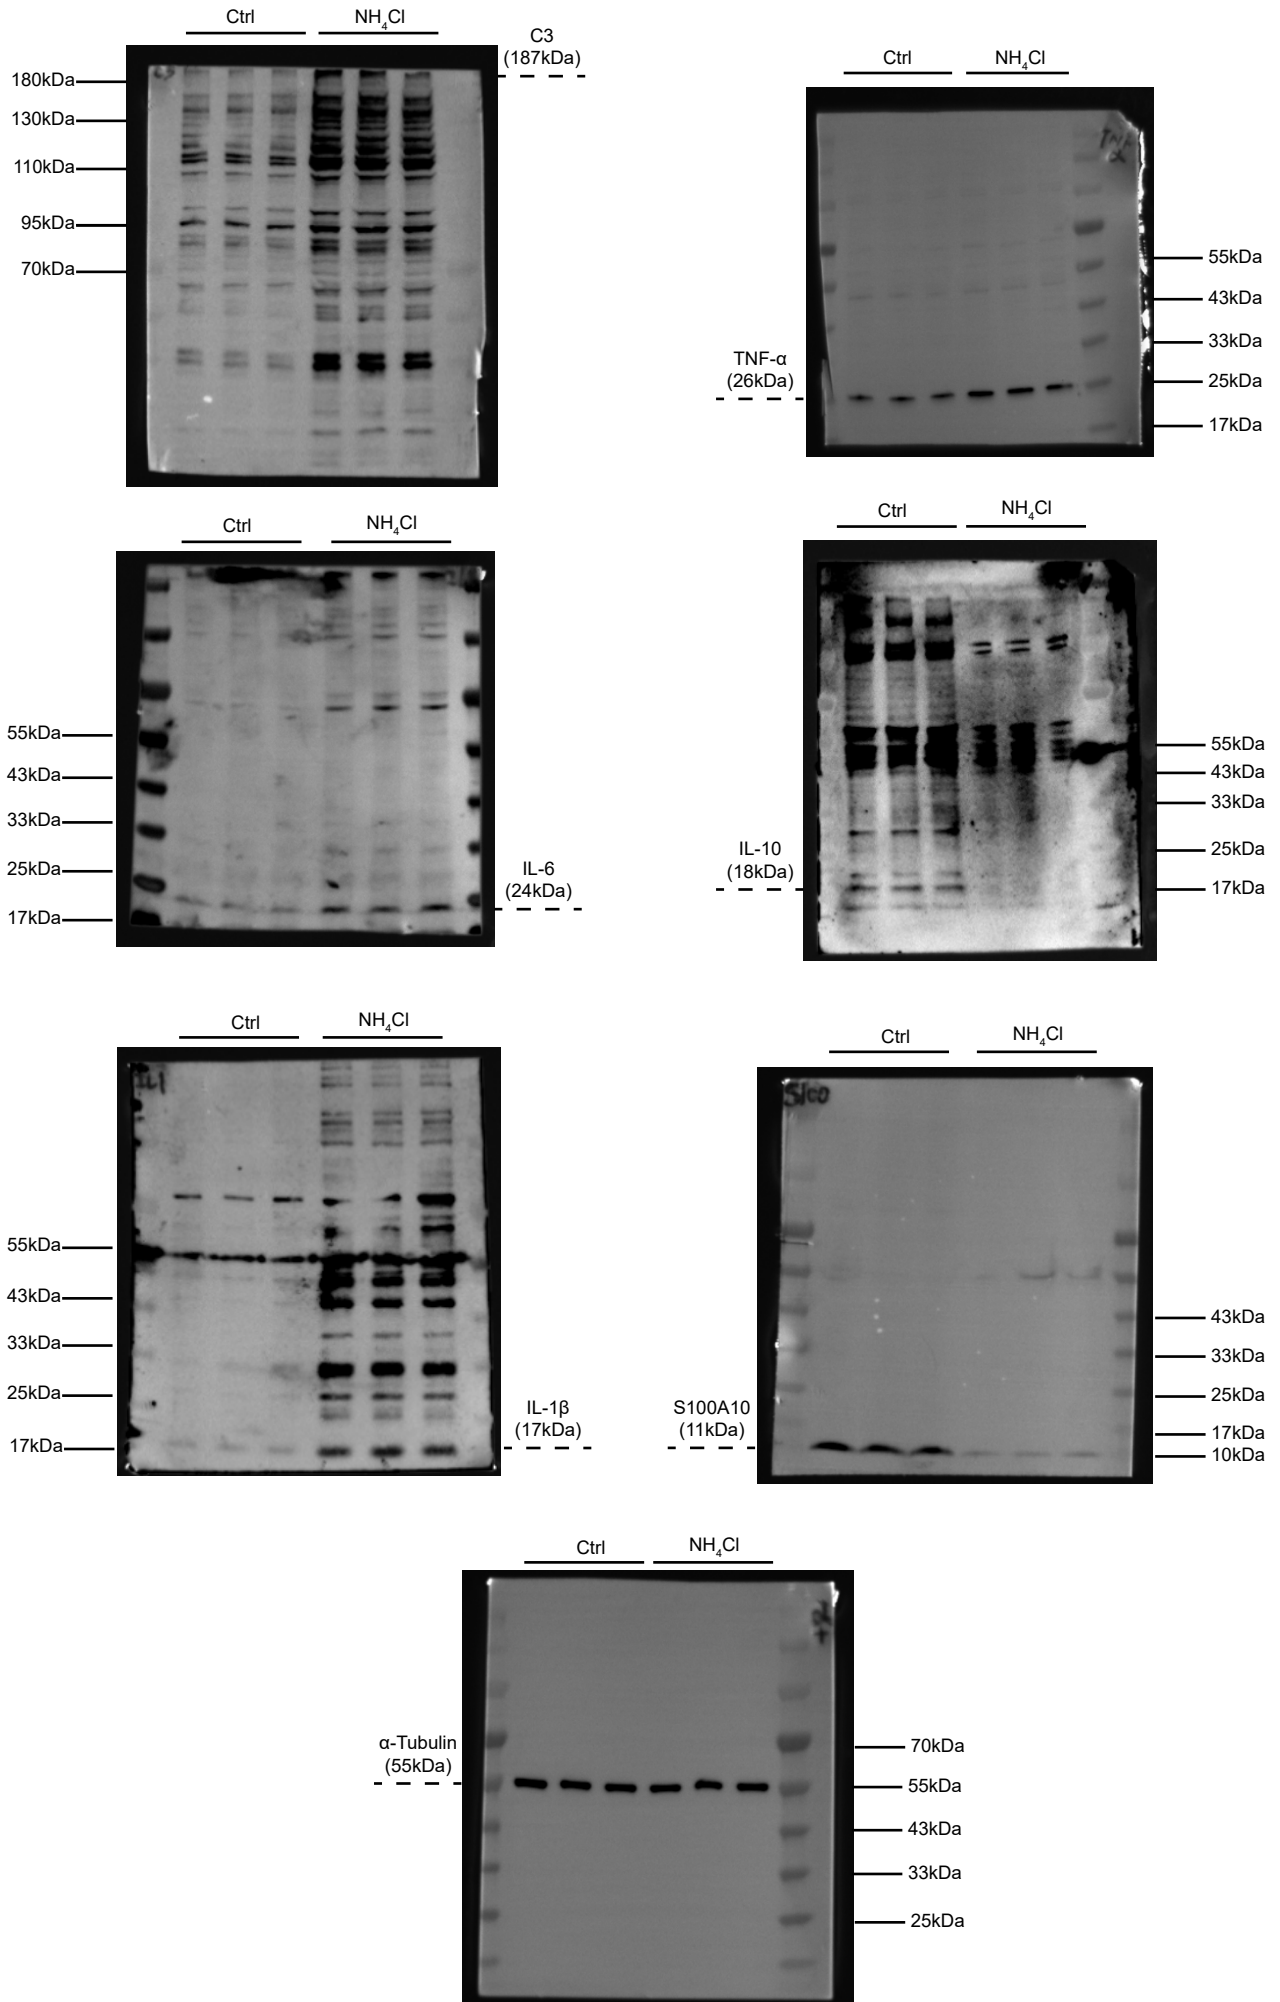

# Uncropped original Western blot image corresponding to Figure 3H

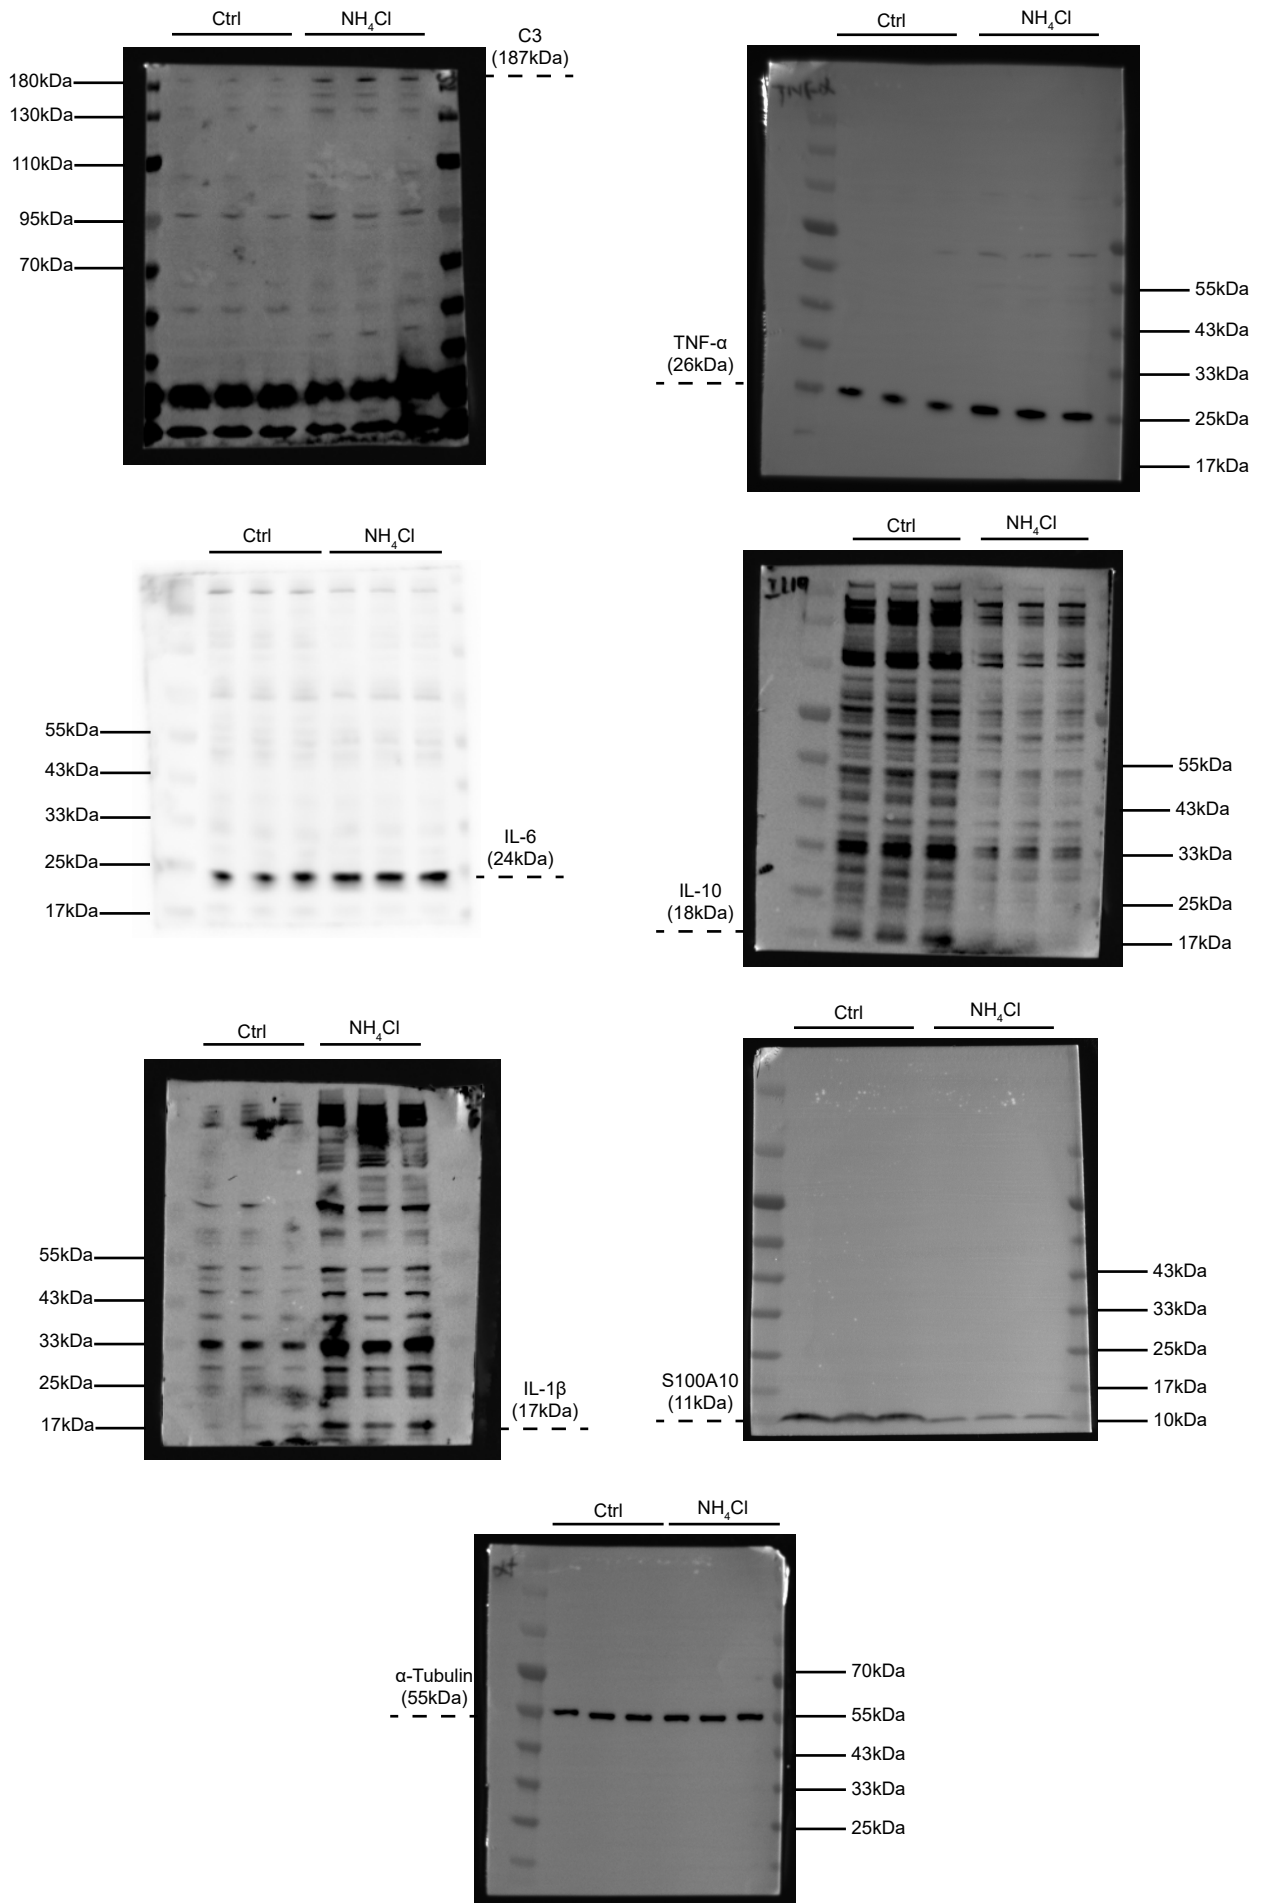

# Uncropped original Western blot image corresponding to Figure 3J

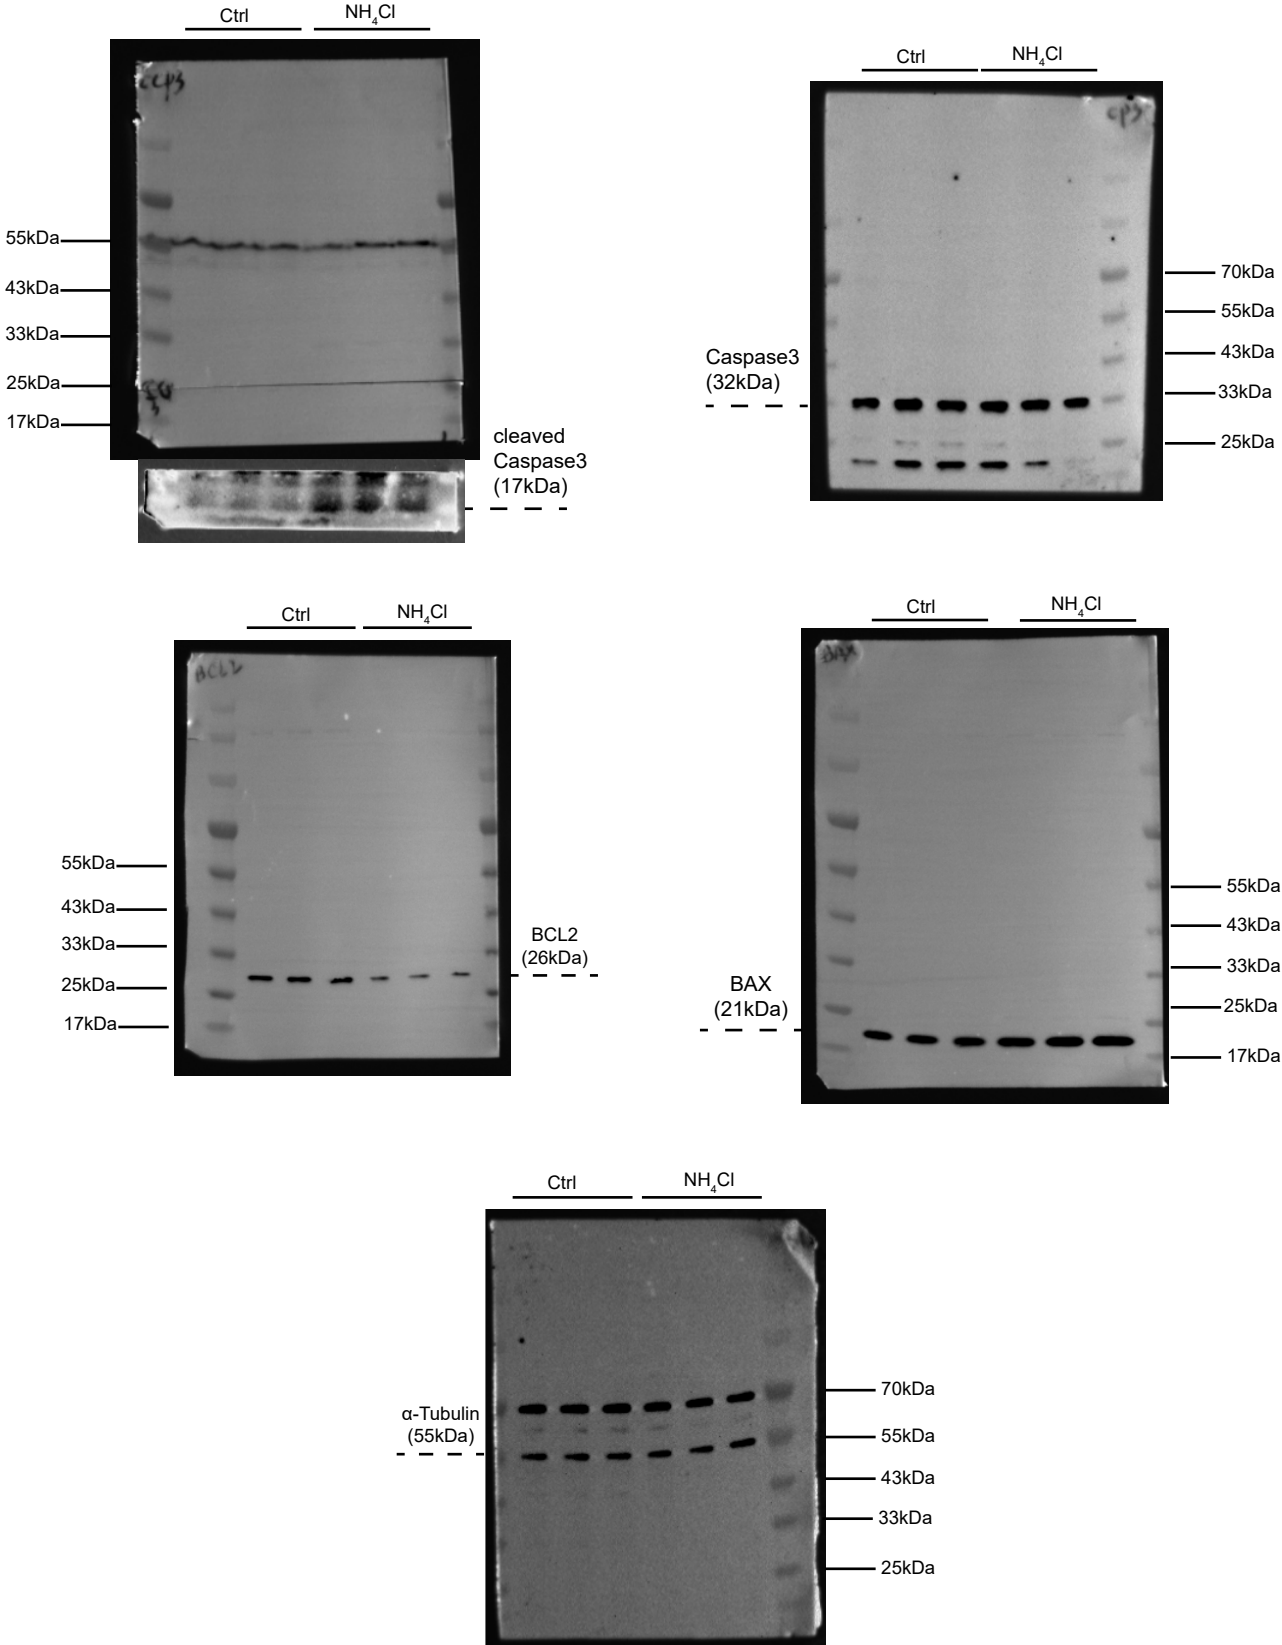

# Uncropped original Western blot image corresponding to Figure 3K

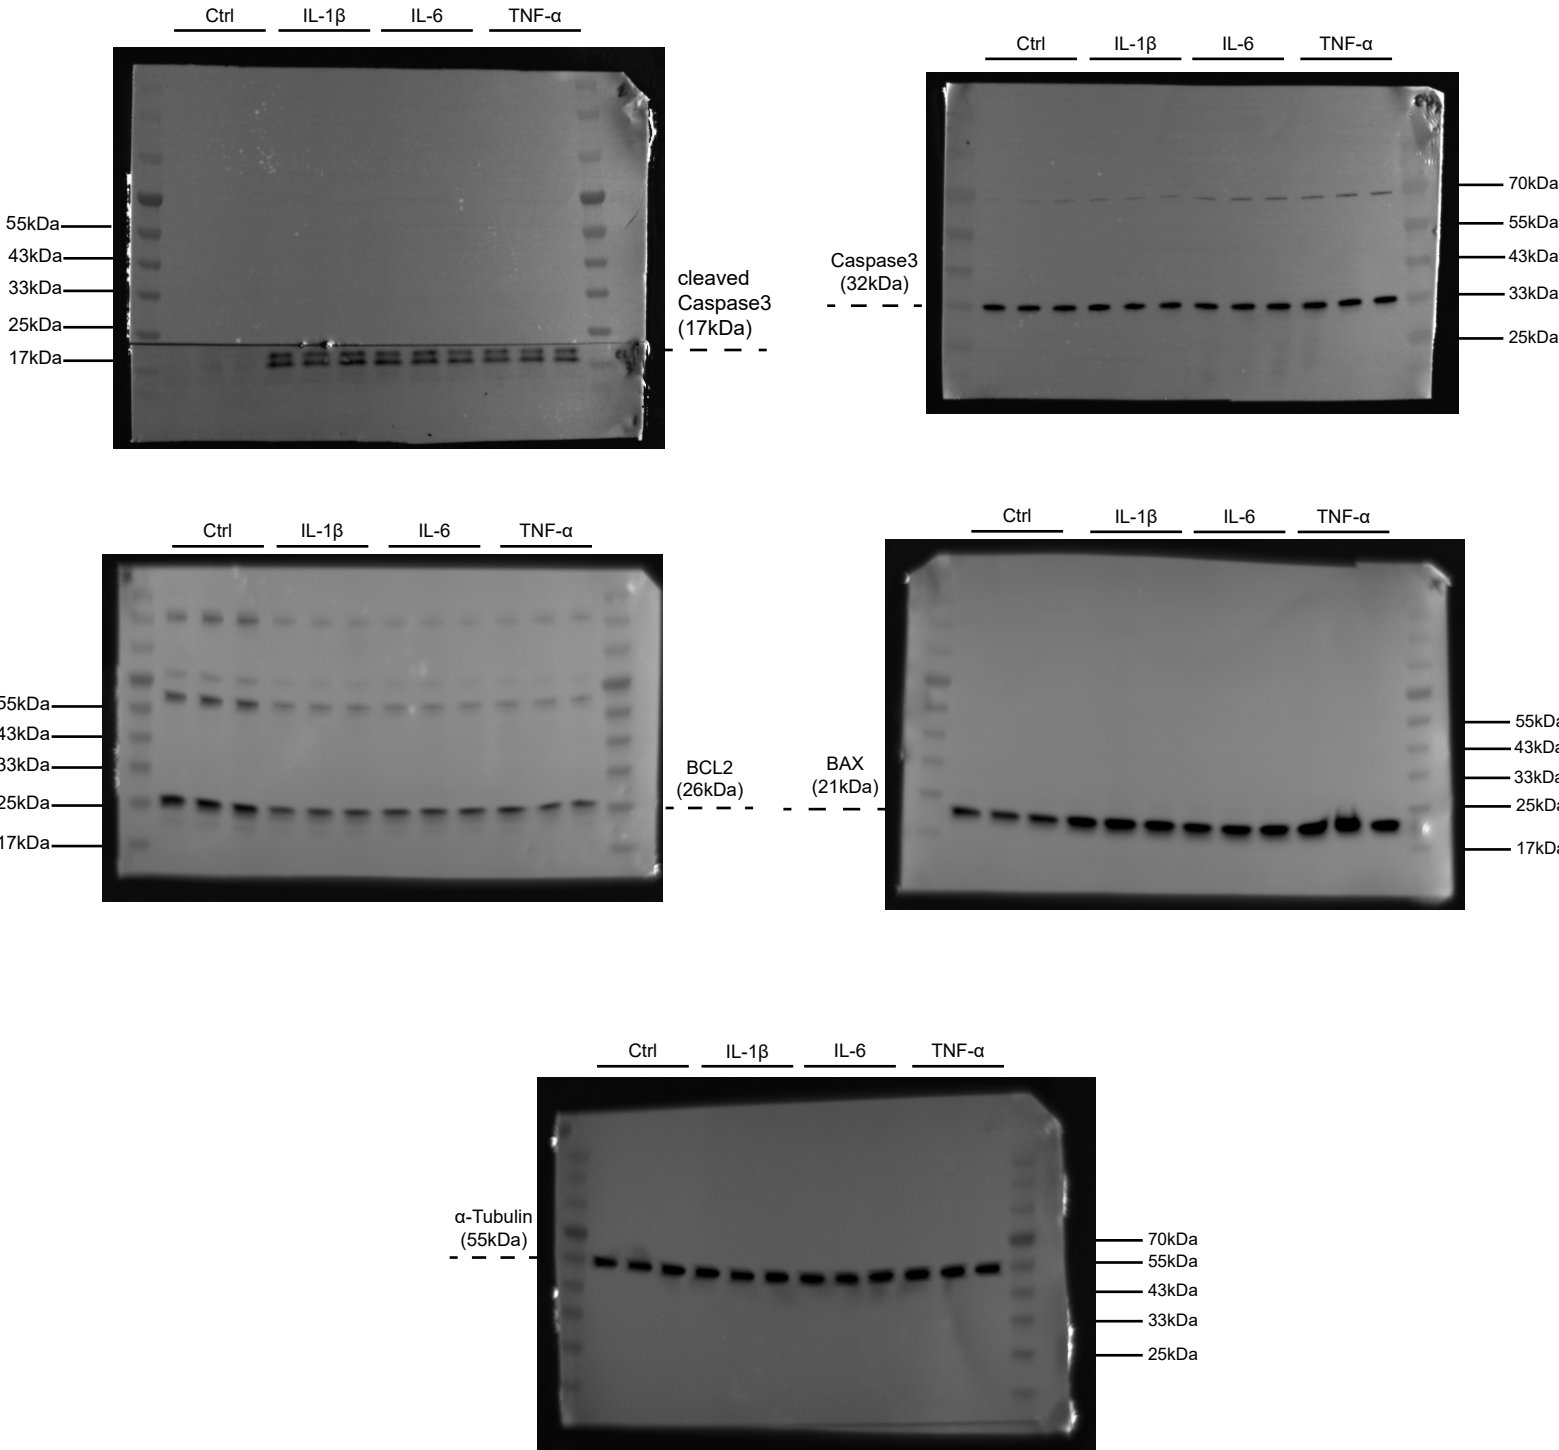

# Uncropped original Western blot image corresponding to Figure 4F

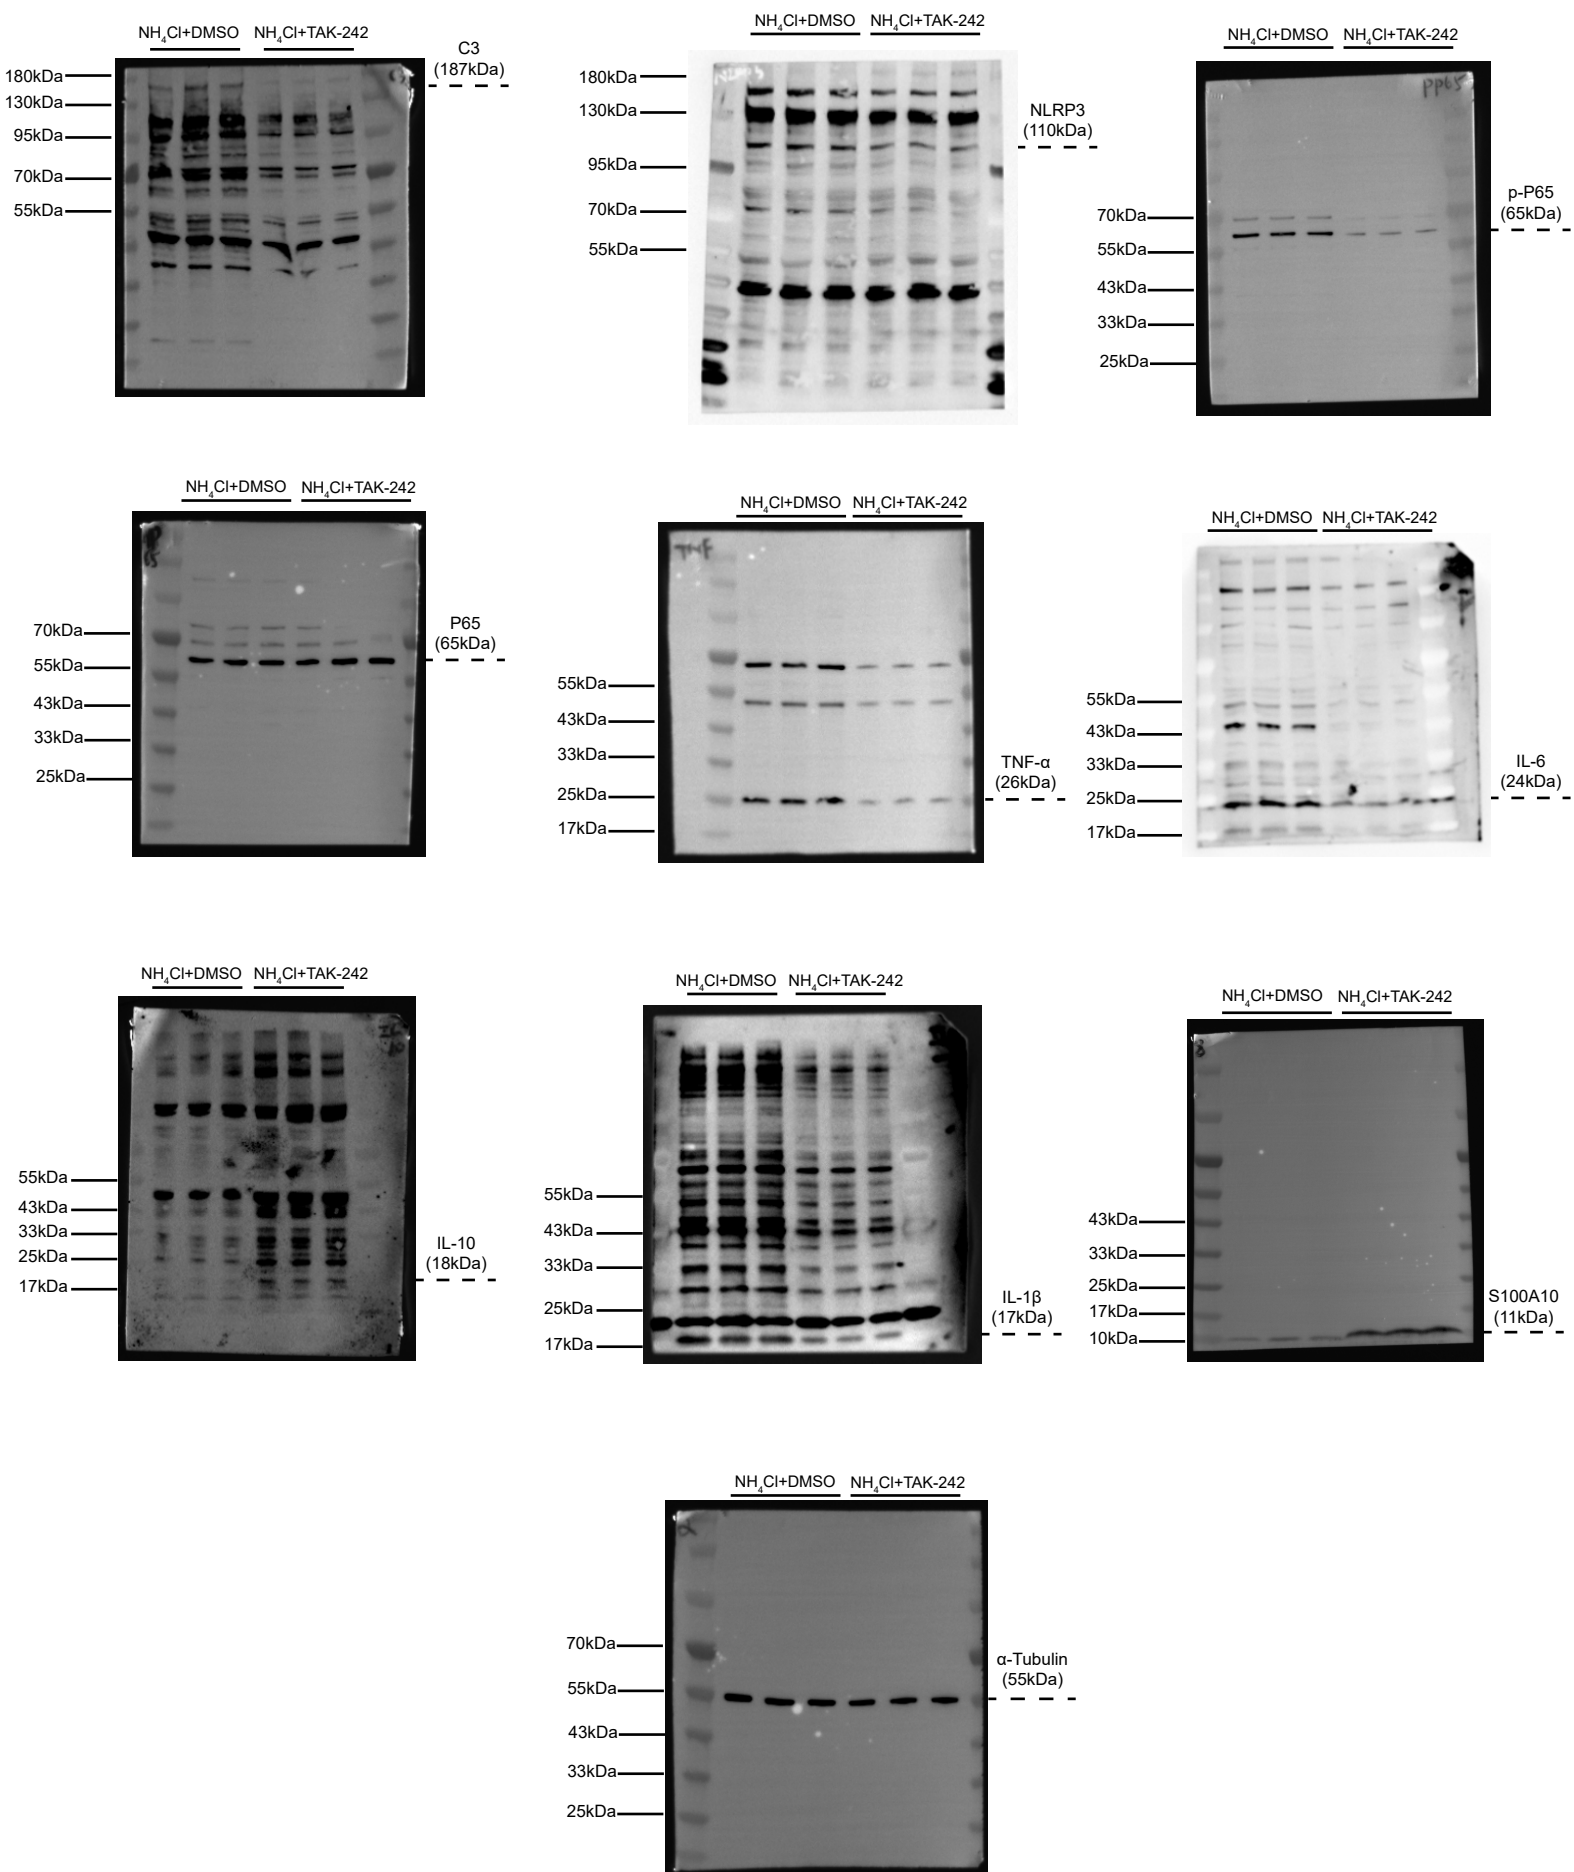

# Uncropped original Western blot image corresponding to Figure 4J

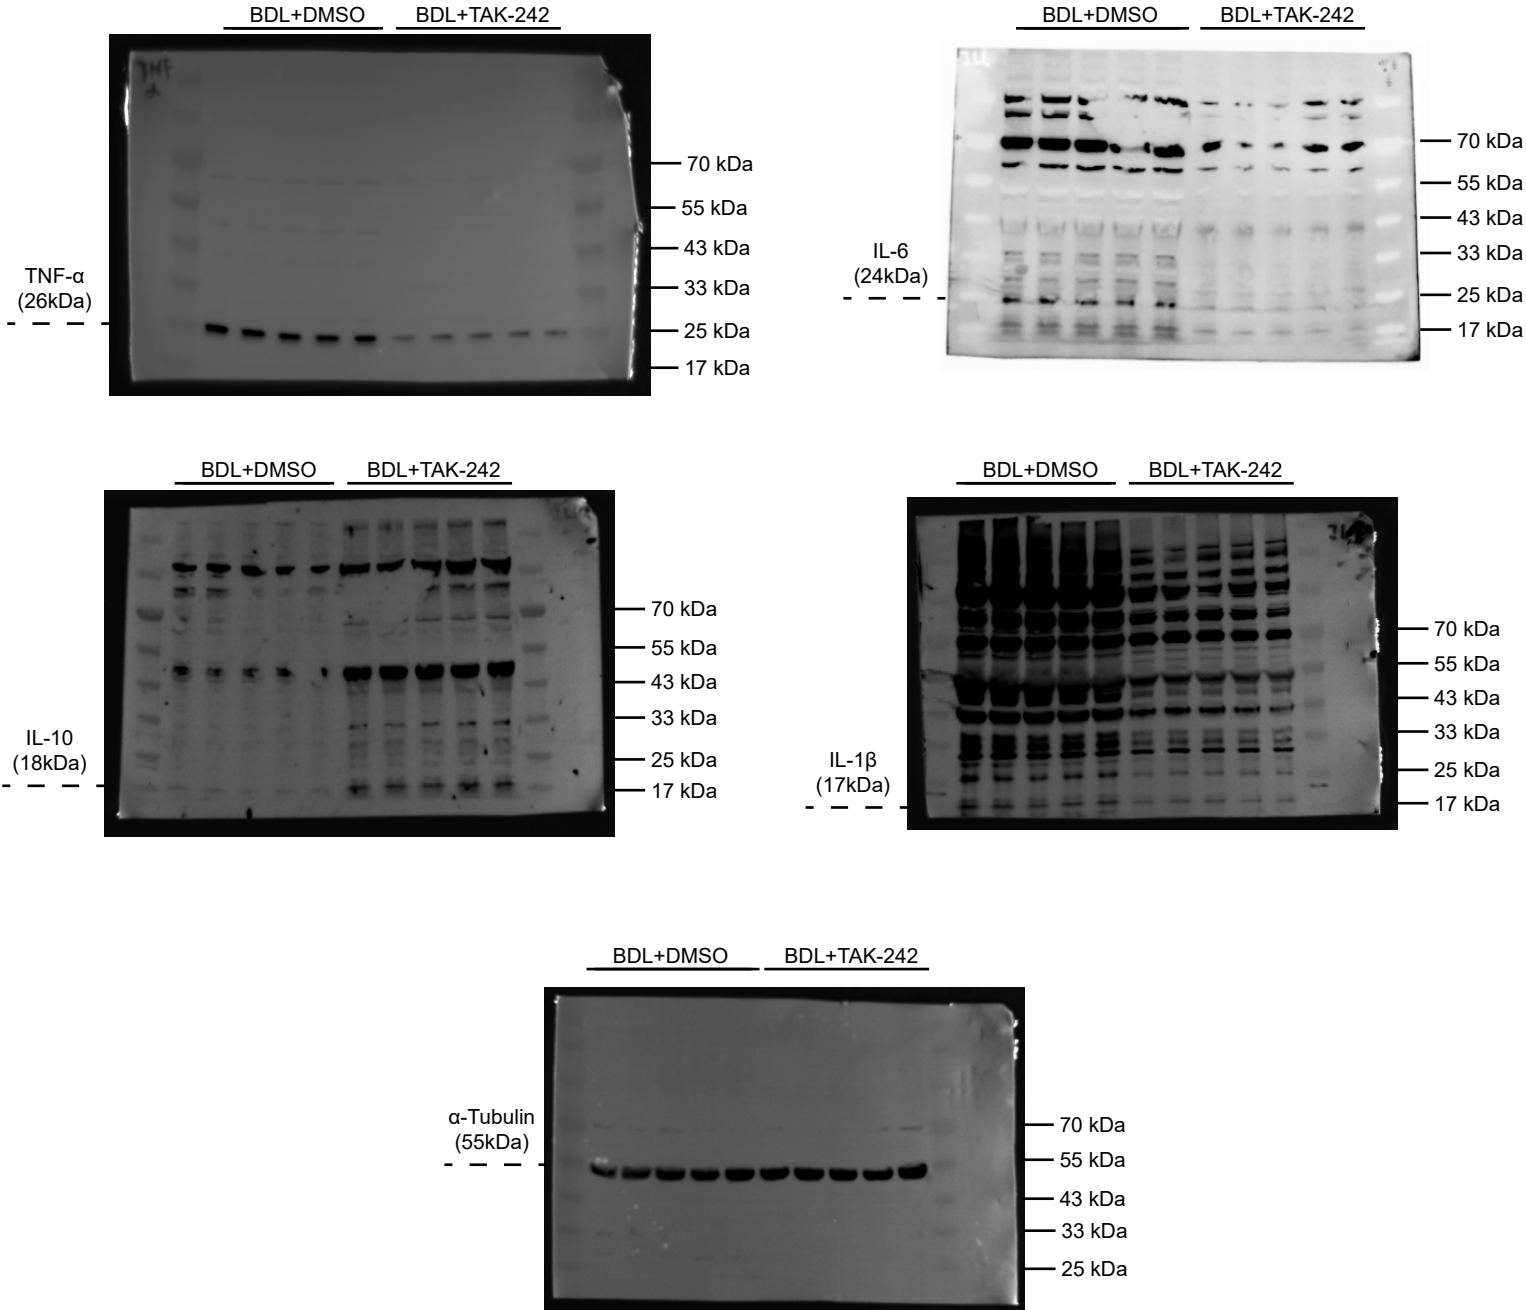

# Uncropped original Western blot image corresponding to Figure 5C

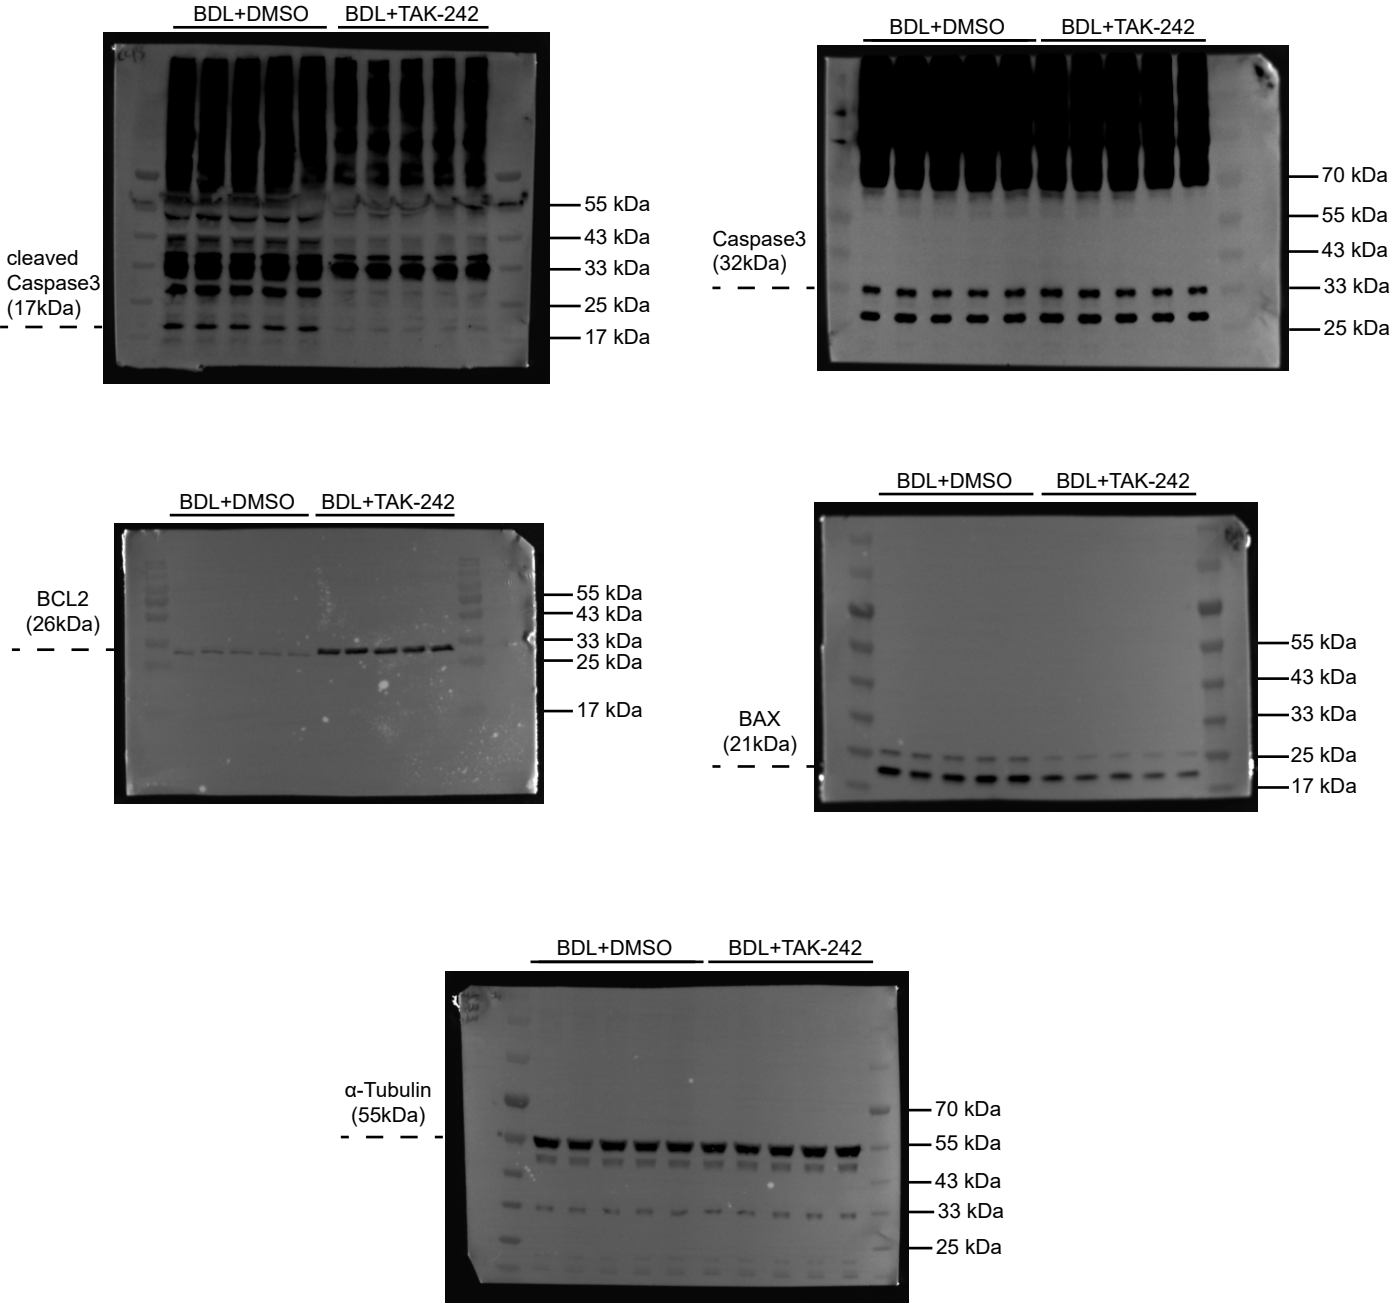

# Uncropped original Western blot image corresponding to Figure S5C

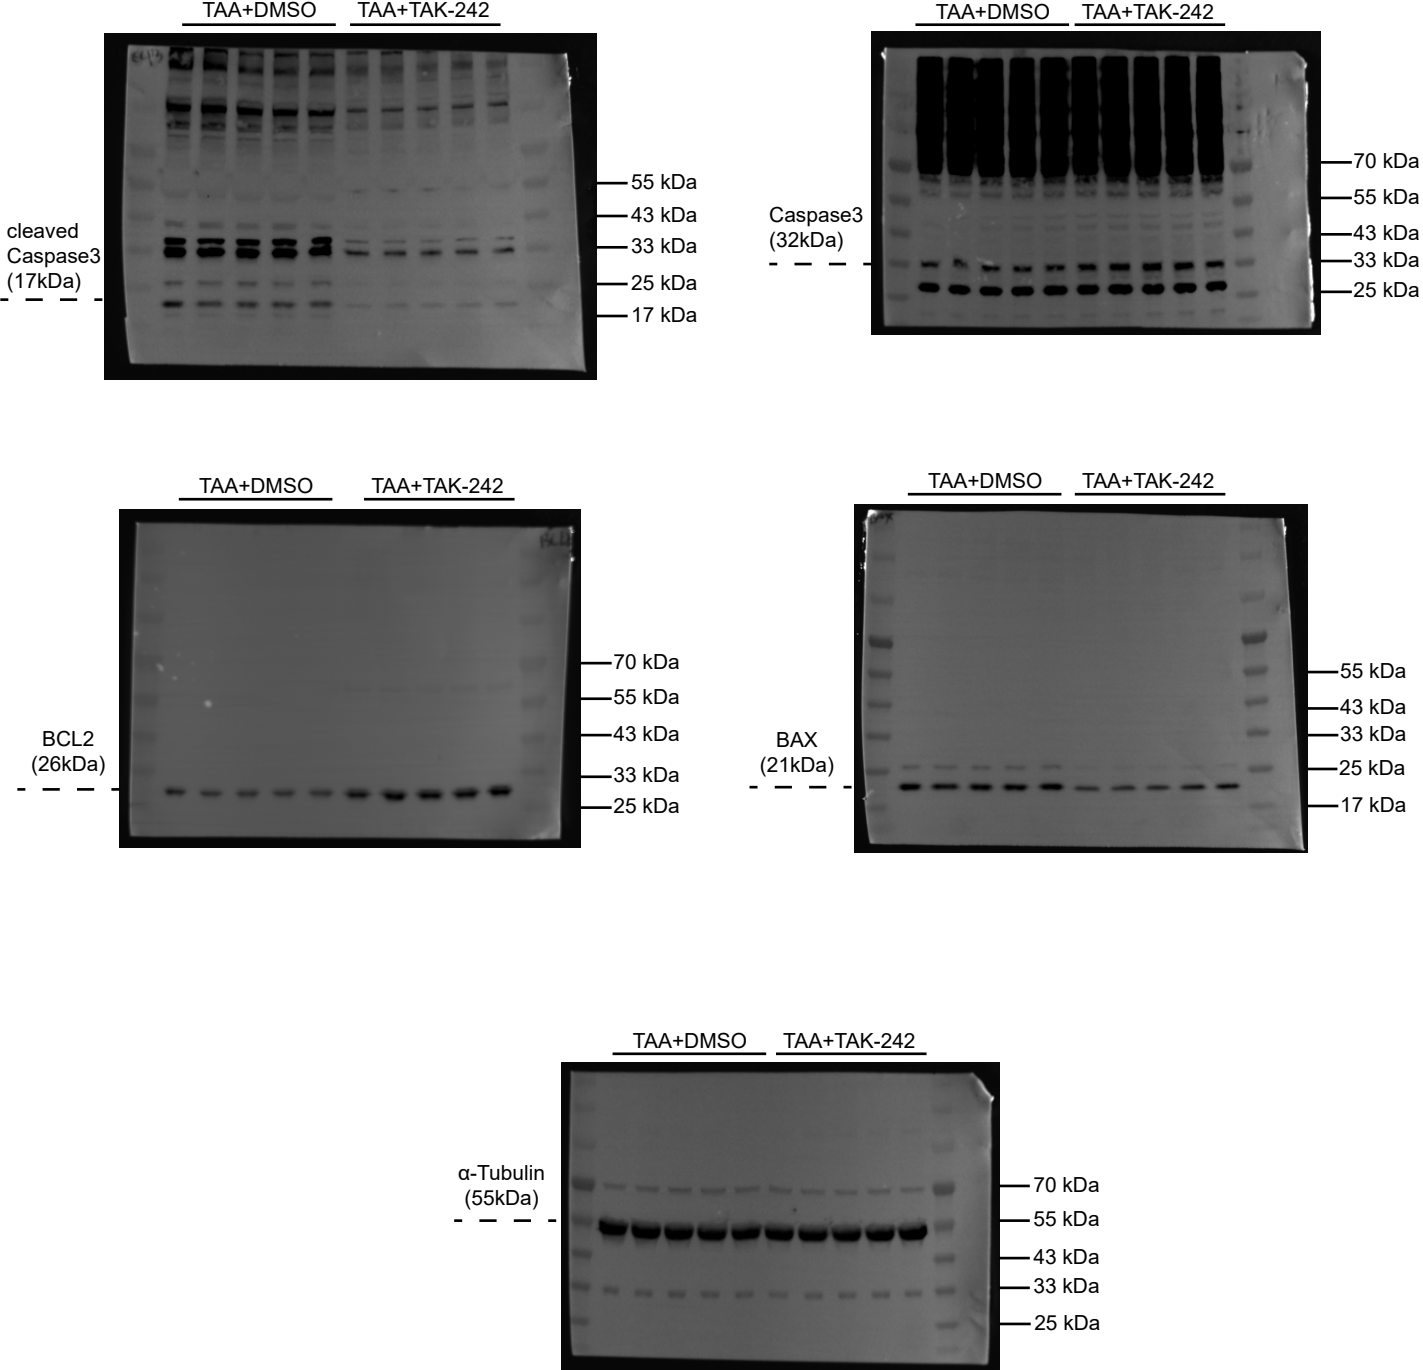

# Uncropped original Western blot image corresponding to Figure 5H

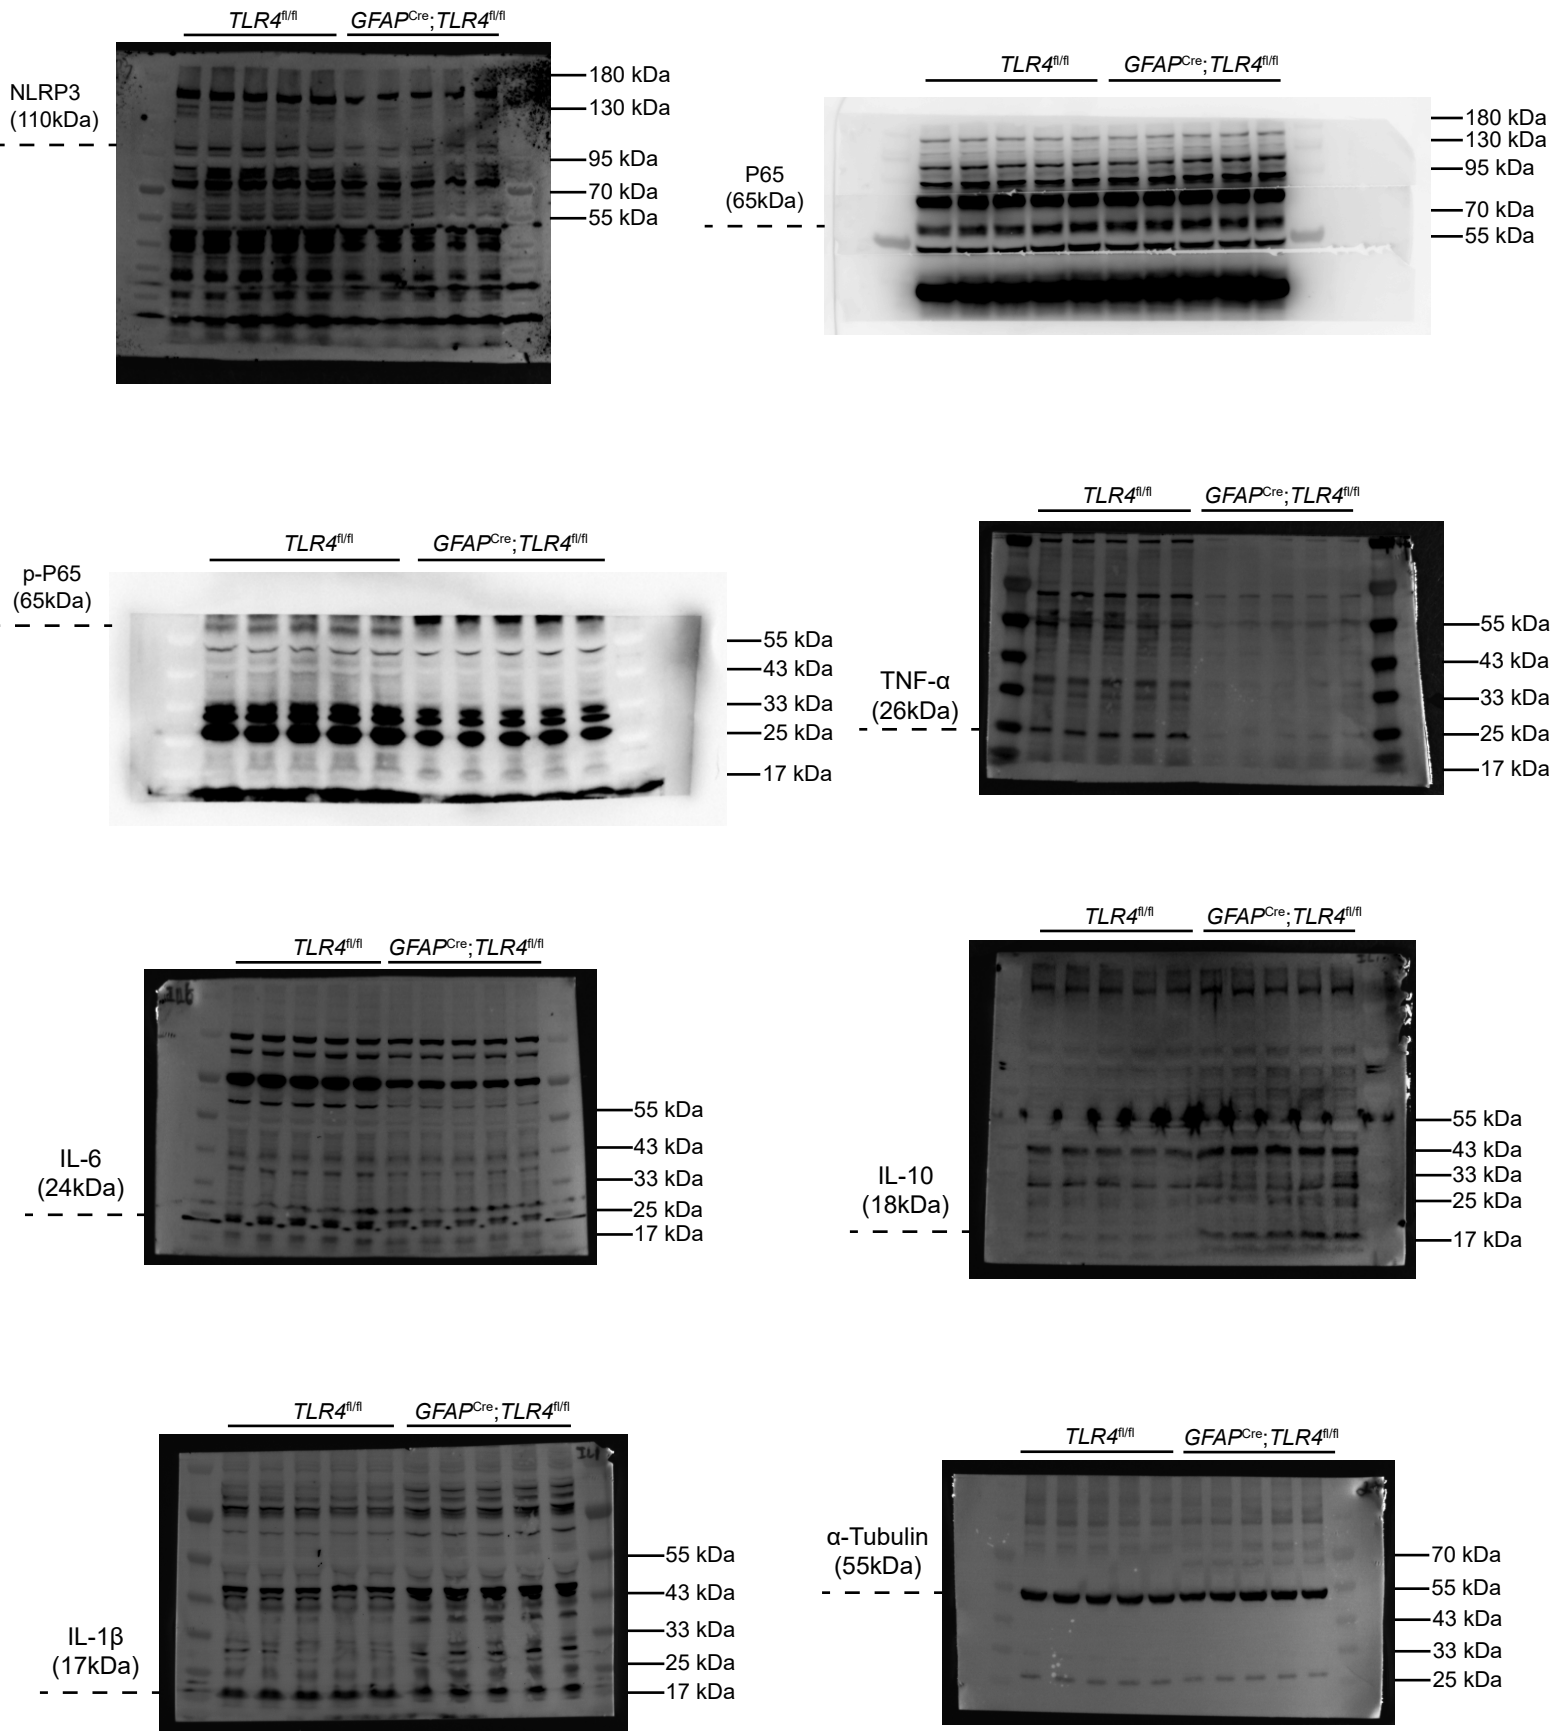

# Uncropped original Western blot image corresponding to Figure 5I

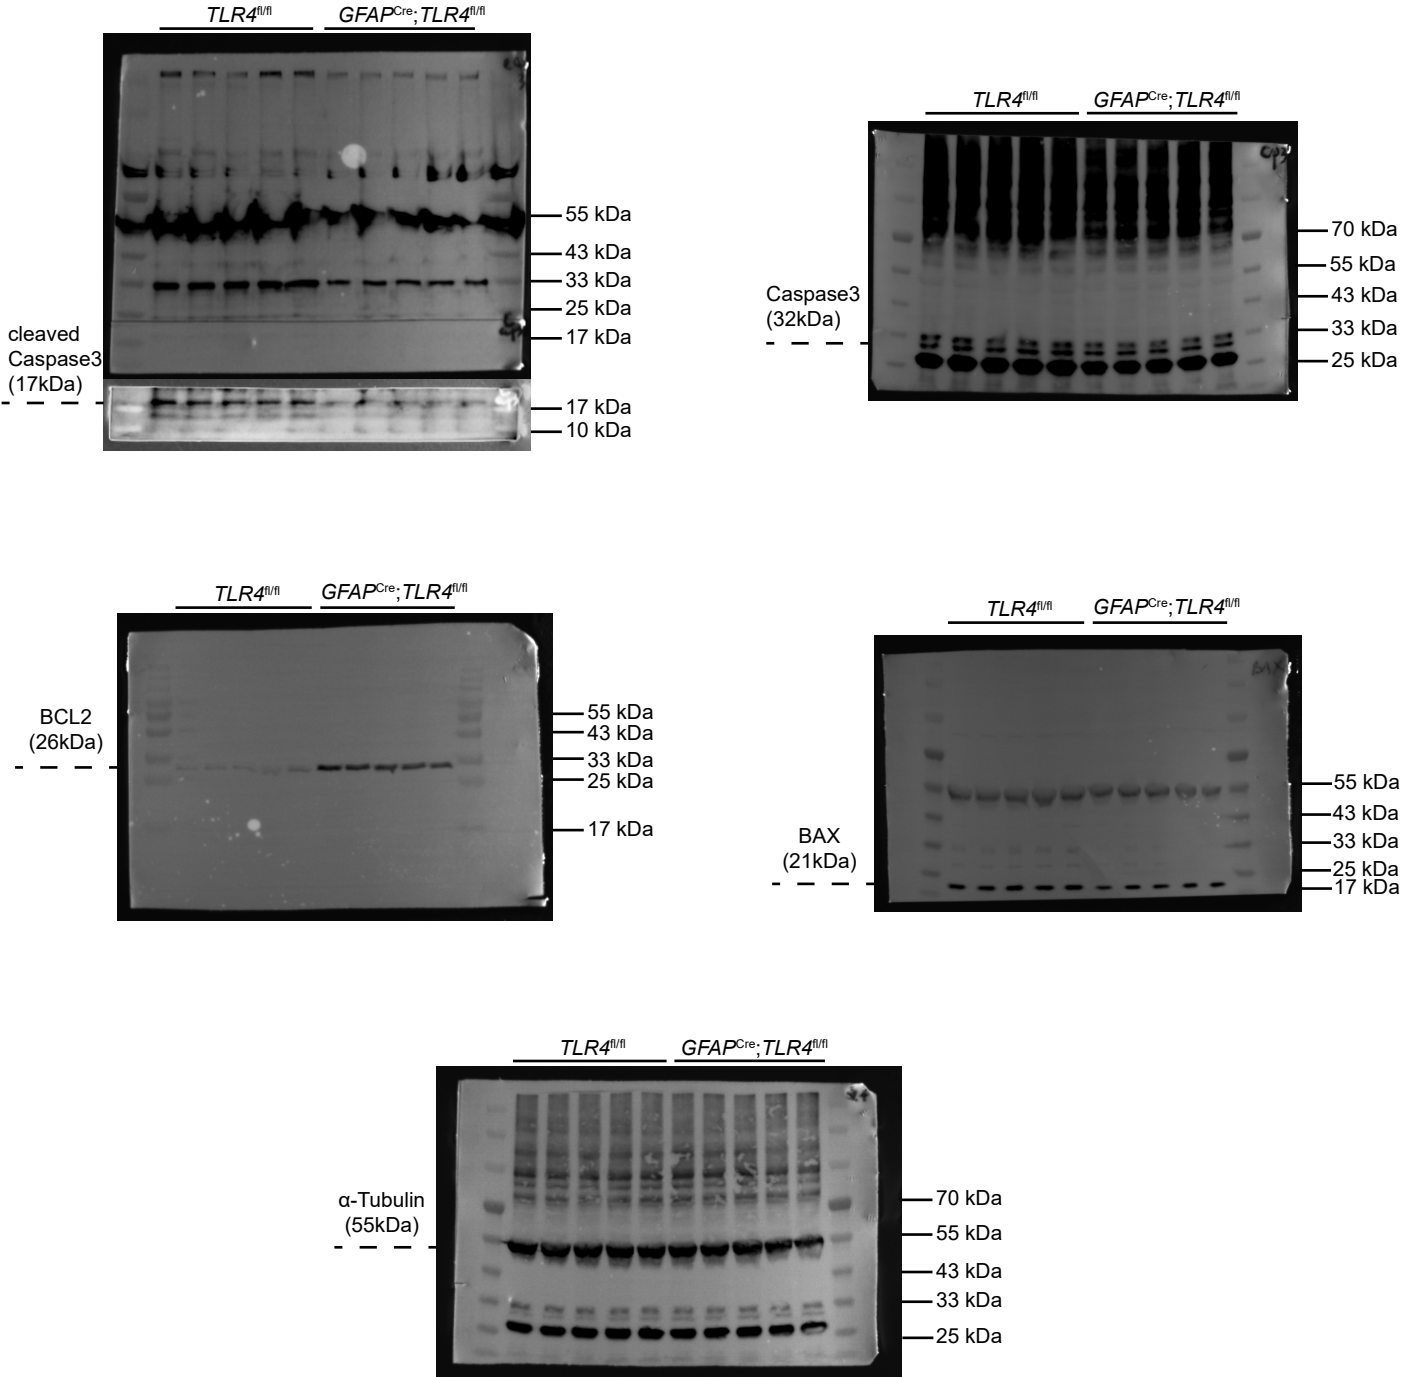

# Uncropped original Western blot image corresponding to Figure 6E

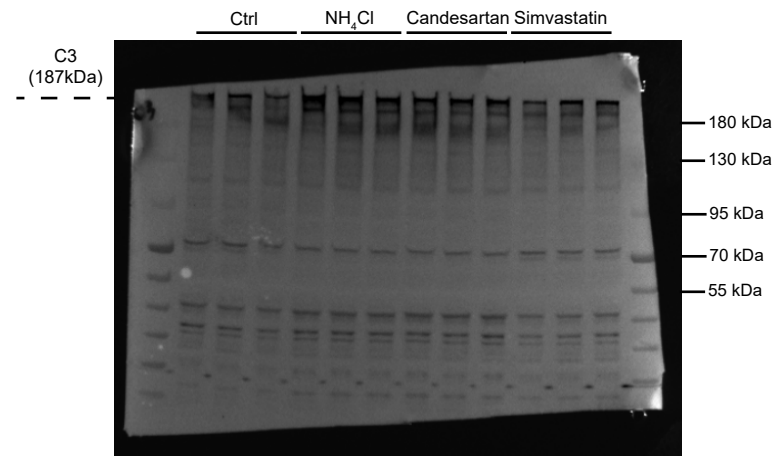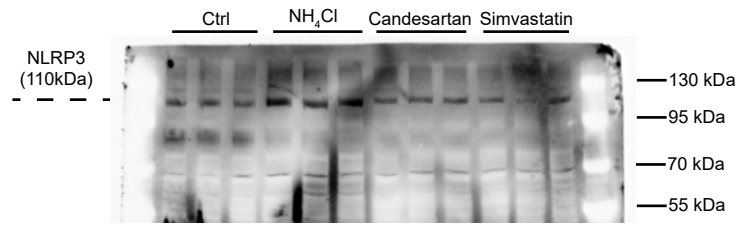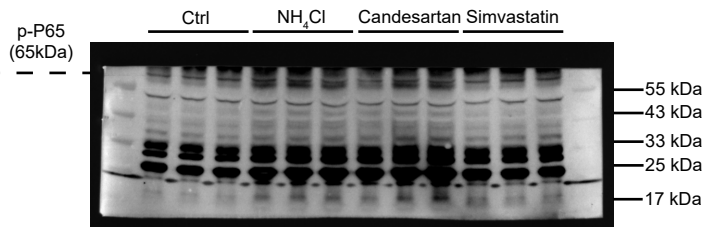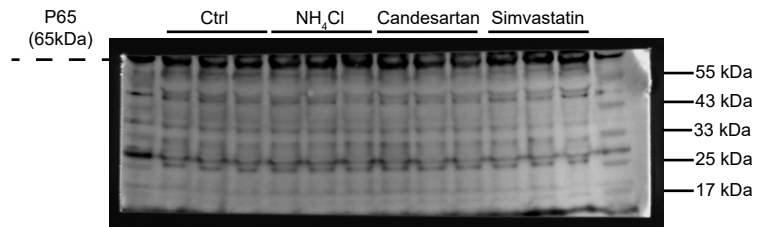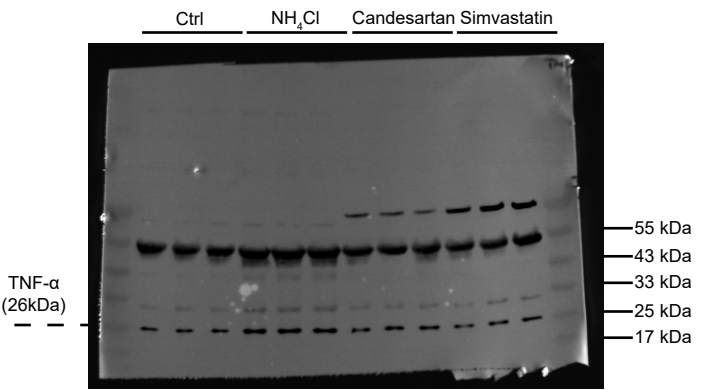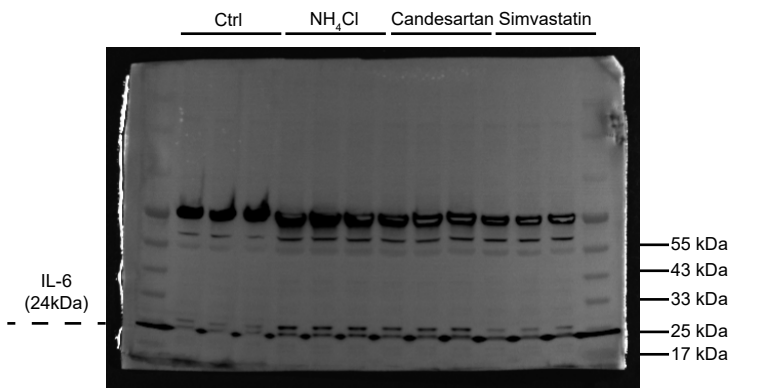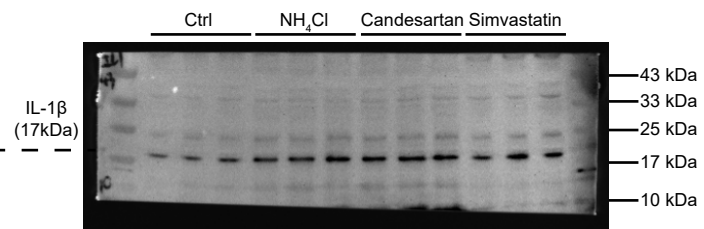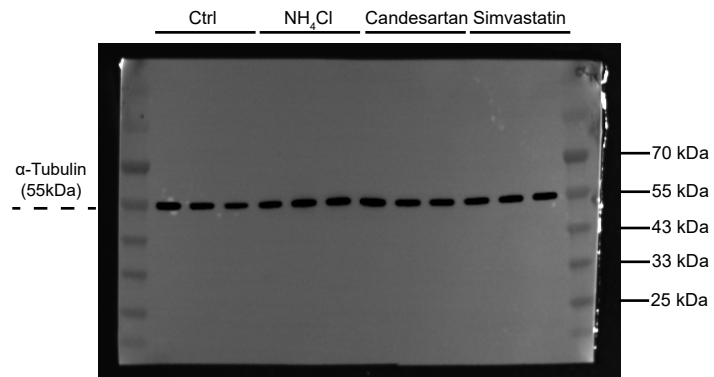

# Uncropped original Western blot image corresponding to Figure 6F

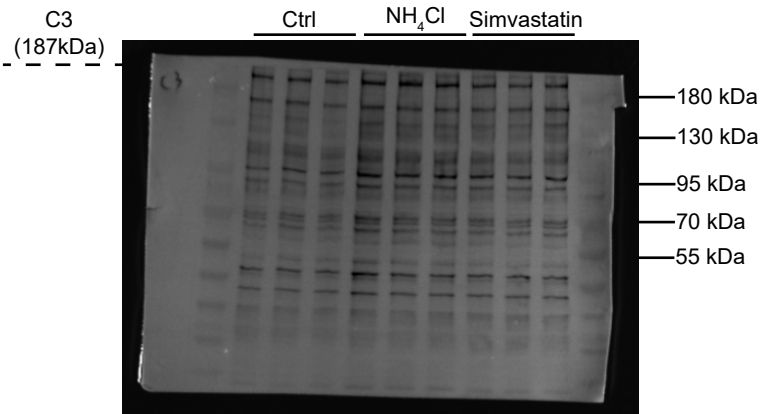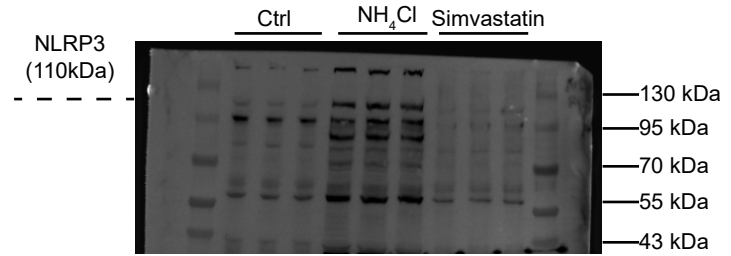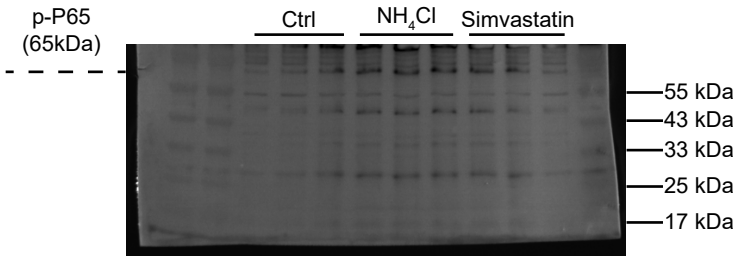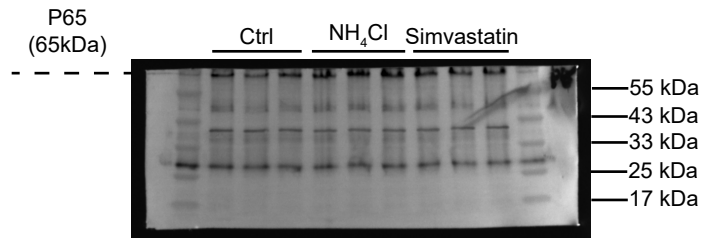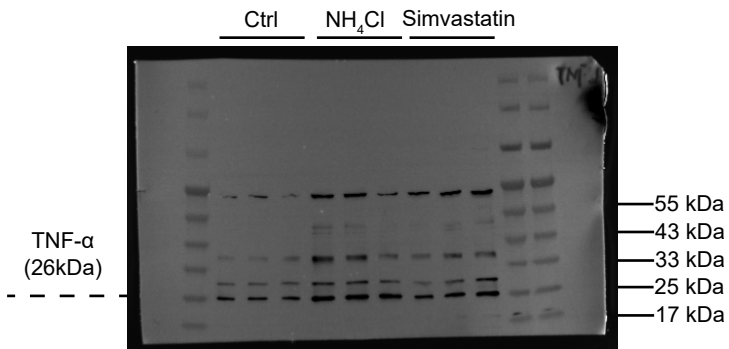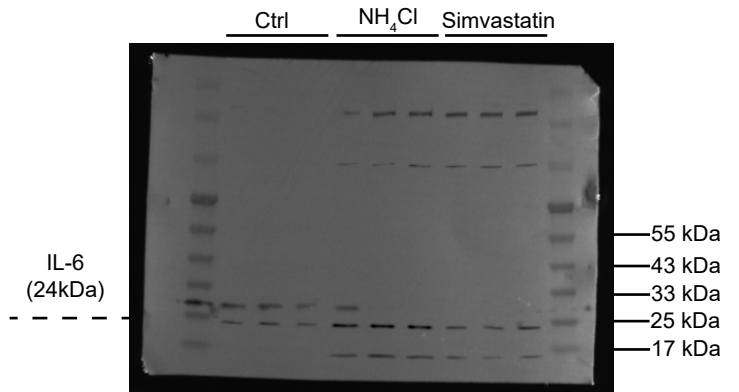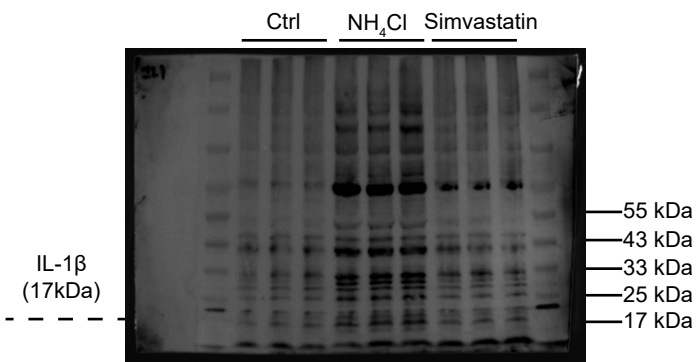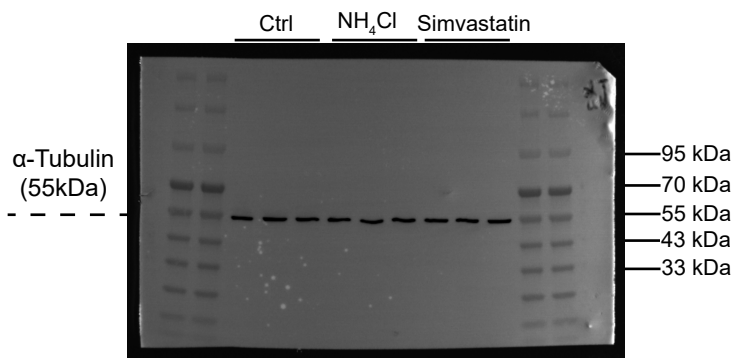

Supplement: Supplementary file 1 [file 5a7df7a7f4ca9766671bddb2.pdf]
