# Supplementary material
Source: Research Square preprint supplement (doi:10.21203/rs.3.rs-9288348/v1)
Supplement: Supplementary file 1 [file 29e94b5b278e0461d5f26c59.xlsx]

## Sheet: Table S4
Table S4: Gene Set Enrichment Analysis (GSEA) of RNA-seq data from HE patients (n = 4) versus healthy controls (n = 4) (dataset GSE57193) using the HALLMARK gene-set collection.
	ID	Description	setSize	enrichmentScore	NES	pvalue	p.adjust	qvalue	rank	leading_edge	core_enrichment
HALLMARK_INTERFERON_GAMMA_RESPONSE	HALLMARK_INTERFERON_GAMMA_RESPONSE	INTERFERON_GAMMA_RESPONSE	193	0.708247	2.77505	7.58013e-31	3.79006e-29	1.67561e-29	2396	tags=48%, list=11%, signal=43%	SOCS3/TXNIP/FPR1/IL4R/IFI30/IFITM2/CXCL11/IFITM3/CCL2/CXCL10/ICAM1/IL6/MT2A/CIITA/C1R/IRF7/CFB/HLA-DQA1/ISG20/SAMD9L/SP110/CD74/IRF1/CASP4/PLSCR1/HLA-A/BATF2/MTHFD2/VAMP8/PNP/MYD88/HLA-B/DDX60/MVP/SSPN/CDKN1A/TAP1/CFH/APOL6/PSMB8/CASP1/HLA-G/CXCL9/CD38/HLA-DRB1/TNFAIP3/NMI/VAMP5/OASL/IL18BP/IL15/CD40/CASP7/RNF213/BST2/PSMB9/C1S/XAF1/B2M/SELP/HLA-DMA/SOCS1/NFKBIA/NOD1/PTPN6/FAS/IL15RA/PARP14/SERPI…
HALLMARK_INFLAMMATORY_RESPONSE	HALLMARK_INFLAMMATORY_RESPONSE	INFLAMMATORY_RESPONSE	197	0.62858	2.46684	2.50329e-19	6.25823e-18	2.7668e-18	2755	tags=45%, list=12%, signal=39%	CSF3/TLR2/FPR1/IL18RAP/IL18R1/IL4R/RGS1/SELL/APLNR/CXCL11/CCL2/CXCL10/ICAM1/SLC7A2/NOD2/ITGB3/IL6/IFITM1/F3/CD14/OSMR/TIMP1/ADM/IRF7/TLR1/ITGA5/ADORA2B/IL18/IRF1/EMP3/C5AR1/IL1R1/P2RY2/SELE/PTGER2/SLC1A2/EDN1/EBI3/PLAUR/STAB1/CDKN1A/CXCL9/SLC4A4/CSF1/ABCA1/NMI/LYN/TLR3/TNFRSF1B/BEST1/IL15/BTG2/CYBB/CD40/MSR1/BST2/ITGB8/CSF3R/NFKBIA/IL12B/AXL/IL15RA/PTGIR/RTP4/MYC/RHOG/OSM/C3AR1/CD48/PROK2/FZD5/ME…
HALLMARK_ALLOGRAFT_REJECTION	HALLMARK_ALLOGRAFT_REJECTION	ALLOGRAFT_REJECTION	195	0.625626	2.45256	1.23374e-18	2.05624e-17	9.09073e-18	2578	tags=38%, list=12%, signal=34%	TLR2/IL18RAP/IL4R/CAPG/CCL2/GPR65/ICAM1/IL6/MMP9/HCLS1/SRGN/TIMP1/IRF7/TLR1/HLA-DQA1/NCF4/IL18/ELF4/CD74/GBP2/HLA-A/INHBB/EGFR/TGFB1/HLA-DOA/FGR/STAB1/HLA-E/TAP1/ITGB2/CFP/HLA-G/CXCL9/CSF1/LYN/TLR3/SPI1/ITGAL/IL15/MAP4K1/CD40/CCR1/HLA-DRA/F2R/HLA-DMB/B2M/HLA-DMA/SOCS1/CCR2/BCL3/IL12B/PTPN6/CARTPT/FAS/LY75/C2/CD96/TGFB2/IL7/IL16/IGSF6/ITK/CCL11/CD86/PTPRC/IRF8/TNF/IFNGR1/LY86/HLA-DOB/TLR6/LIF/CCR5…
HALLMARK_IL6_JAK_STAT3_SIGNALING	HALLMARK_IL6_JAK_STAT3_SIGNALING	IL6_JAK_STAT3_SIGNALING	87	0.756171	2.69218	3.08623e-18	3.85779e-17	1.70555e-17	2952	tags=61%, list=13%, signal=53%	SOCS3/CXCL1/CD44/TLR2/IL18R1/IL4R/CXCL11/CXCL10/ITGB3/IL6/CD14/HMOX1/OSMR/IL17RB/IRF1/IL1R1/MAP3K8/LTBR/TNFRSF1A/MYD88/EBI3/TGFB1/CXCL9/CD38/TNFRSF12A/CSF1/TNFRSF1B/CNTFR/IL13RA1/ACVRL1/CCR1/IL1R2/CD9/CSF3R/SOCS1/FAS/PLA2G2A/CXCL3/IL15RA/DNTT/CSF2RA/IL6ST/IL7/PIK3R5/PIM1/TNF/IFNGR1/LEPR/STAT3/IL1B/IL2RG/IL17RA/IRF9
HALLMARK_INTERFERON_ALPHA_RESPONSE	HALLMARK_INTERFERON_ALPHA_RESPONSE	INTERFERON_ALPHA_RESPONSE	92	0.722863	2.58276	2.08009e-16	2.08009e-15	9.19619e-16	4945	tags=75%, list=22%, signal=58%	TXNIP/IL4R/SELL/IFI30/IFITM2/CXCL11/IFITM3/CXCL10/IFITM1/GMPR/IRF7/ISG20/SAMD9L/SP110/CD74/IRF1/GBP2/PLSCR1/BATF2/DDX60/TAP1/PSMB8/CASP1/PARP9/CSF1/NMI/OASL/IL15/ELF1/BST2/PSMB9/C1S/B2M/PARP14/IFIT3/RTP4/IFI35/EPSTI1/IFI44L/LAP3/IL7/IFI44/TRIM21/MOV10/UBE2L6/UBA7/LPAR6/IRF9/TRAFD1/TMEM140/USP18/PARP12/PSME2/IFIT2/LGALS3BP/CMPK2/ISG15/TRIM5/PSME1/CD47/PROCR/DHX58/TRIM14/CCRL2/LAMP3/RIPK2/CNP/CASP8…
HALLMARK_IL2_STAT5_SIGNALING	HALLMARK_IL2_STAT5_SIGNALING	IL2_STAT5_SIGNALING	193	0.605696	2.37323	2.57703e-16	2.14753e-15	9.49433e-16	2541	tags=36%, list=12%, signal=32%	IL1RL1/CD44/IL18R1/IL4R/EMP1/SELL/CAPG/IFITM3/CXCL10/GPR65/MUC1/SLC1A5/AHNAK/TGM2/HK2/PLIN2/SPP1/ITIH5/PLSCR1/NFKBIZ/LRIG1/MAP3K8/BATF/PTGER2/PNP/FAH/GADD45B/CSF1/TNFRSF1B/GLIPR2/SHE/DHRS3/NRP1/IL1R2/RHOH/NDRG1/WLS/SELP/SOCS1/GALM/IKZF2/ITGAV/MYC/SERPINB6/MAFF/ITGA6/PTH1R/SYNGR2/CD81/TRAF1/AMACR/MAPKAPK2/CD48/CD79B/S100A1/RHOB/FLT3LG/CDKN1C/CST7/CD86/PIM1/P4HA1/IRF8/RGS16/IFNGR1/TLR7/IL10RA/LIF/C…
HALLMARK_TNFA_SIGNALING_VIA_NFKB	HALLMARK_TNFA_SIGNALING_VIA_NFKB	TNFA_SIGNALING_VIA_NFKB	196	0.57496	2.25744	2.10895e-13	1.50639e-12	6.65984e-13	2963	tags=39%, list=13%, signal=34%	SOCS3/CXCL1/CD44/TLR2/CXCL2/SDC4/BCL2A1/ZFP36/CXCL11/CCL2/CXCL10/ICAM1/IL6/F3/TNC/IL18/GEM/IRF1/TGIF1/F2RL1/MAP3K8/EDN1/PLAUR/CDKN1A/TAP1/SGK1/GADD45B/CSF1/ABCA1/TNFAIP3/PDLIM5/BTG2/TIPARP/EFNA1/NFKBIA/BCL3/IL12B/DRAM1/CXCL3/IL15RA/STAT5A/SOD2/MYC/MAFF/SAT1/RNF19B/TRAF1/CEBPD/LITAF/BTG3/MCL1/IL6ST/RHOB/GADD45A/FOSL1/TRIP10/KLF4/SERPINE1/TNF/CEBPB/NAMPT/TNFAIP8/CD69/NFKB2/LIF/TNIP2/IL1B/ATF3/RELA/…
HALLMARK_P53_PATHWAY	HALLMARK_P53_PATHWAY	P53_PATHWAY	192	0.564351	2.21042	1.03133e-12	6.44579e-12	2.84972e-12	4237	tags=42%, list=19%, signal=34%	TXNIP/ITGB4/IFI30/SFN/NUPR1/STOM/HMOX1/TPD52L1/EPHX1/STEAP3/VAMP8/EPHA2/INHBB/PITPNC1/TGFB1/S100A10/CDKN1A/TAP1/RHBDF2/CASP1/ABHD4/DDIT4/TM4SF1/BTG2/TRAF4/F2R/SLC7A11/NDRG1/BAIAP2/SOCS1/TCN2/FAS/DRAM1/MAPKAPK3/TGFA/SAT1/CD81/VDR/PLXNB2/RNF19B/RALGDS/ALOX15B/TAX1BP3/GADD45A/PERP/KLF4/RGS16/TOB1/SLC3A2/OSGIN1/LIF/NHLH2/NOTCH1/SERTAD3/RPS12/ATF3/TP53/UPP1/CLCA2/KIF13B/BTG1/S100A4/SP1/RRAD/TRAFD1/DCX…
HALLMARK_COMPLEMENT	HALLMARK_COMPLEMENT	COMPLEMENT	194	0.563433	2.20814	1.79574e-12	9.97636e-12	4.4106e-12	2148	tags=30%, list=10%, signal=28%	CXCL1/S100A9/S100A12/CP/C1QC/SERPINA1/C1QA/IL6/F3/C3/C1R/FCN1/ANG/TIMP1/LGALS3/IRF7/CFB/IRF1/CASP4/PHEX/PLSCR1/ADRA2B/FCER1G/PLAUR/F5/CSRP1/CFH/CASP1/CDA/TNFAIP3/APOBEC3G/LYN/PRSS36/CASP7/PSMB9/C1S/COL4A2/LTF/SERPING1/PIK3CG/FN1/MAFF/RHOG/CLU/PLAT/APOBEC3F/LAMP2/LAP3/CTSH/CTSC/TFPI2/C2/ANXA5/PIK3R5/CTSO/GNAI3/SERPINE1/PIM1/CEBPB
HALLMARK_EPITHELIAL_MESENCHYMAL_TRANSITION	HALLMARK_EPITHELIAL_MESENCHYMAL_TRANSITION	EPITHELIAL_MESENCHYMAL_TRANSITION	195	0.556727	2.18247	5.84046e-12	2.92023e-11	1.29105e-11	4255	tags=50%, list=19%, signal=41%	CXCL1/CD44/SDC4/GJA1/TNFRSF11B/OXTR/CAPG/ITGB3/IL6/MGP/TIMP1/TAGLN/TNC/TGM2/ITGA5/TPM2/SPP1/GEM/TGFBR3/EMP3/VIM/TIMP3/FERMT2/NOTCH2/SPARC/ACTA2/TGFB1/PLAUR/LOXL2/GADD45B/TNFRSF12A/MMP2/TNFAIP3/PMP22/IL15/MYLK/MYL9/EFEMP2/COL7A1/COL4A2/ANPEP/IGFBP3/FAS/ITGB5/TGFBI/FSTL1/IL32/HTRA1/FN1/ITGAV/COL4A1/SAT1/FBLN1/SERPINH1/TFPI2/VCAM1/RHOB/GADD45A/MSX1/ABI3BP/VCAN/SERPINE1/COL1A1/BGN/COL6A3/SLC6A8/PLOD2…
HALLMARK_HYPOXIA	HALLMARK_HYPOXIA	HYPOXIA	191	0.55018	2.15448	9.99131e-12	4.5415e-11	2.00782e-11	2992	tags=31%, list=14%, signal=27%	ANGPTL4/CP/SDC4/PLAC8/ZFP36/CHST3/SRPX/CA12/IL6/F3/SLC2A5/MT2A/HMOX1/MT1E/ADM/ANXA2/TGM2/HK2/PLIN2/ADORA2B/ISG20/PGAM2/CASP6/EGFR/PLAUR/CDKN1A/TKTL1/DDIT4/PCK1/TNFAIP3/DTNA/SELENBP1/TIPARP/EFNA1/NDRG1/TGFB3/IGFBP3/TGFBI/MAFF/BCAN/WSB1/CDKN1C/SLC2A1/SERPINE1/PIM1/P4HA1/BGN/CSRP2/PHKG1/PGF/LDHC/ATF3/SAP30/SLC25A1/FBP1/BTG1/S100A4/TES/MXI1/PKP1
HALLMARK_APOPTOSIS	HALLMARK_APOPTOSIS	APOPTOSIS	158	0.566578	2.17553	1.33842e-10	5.57674e-10	2.46551e-10	2605	tags=35%, list=12%, signal=31%	CD44/TXNIP/EMP1/IFITM3/IL6/CD14/HMOX1/TIMP1/LGALS3/ISG20/IL18/TGFBR3/IRF1/CASP4/ERBB2/CASP6/LMNA/TIMP3/CDKN1A/TAP1/CASP1/GADD45B/HMGB2/WEE1/CD38/TNFRSF12A/MMP2/TSPO/BTG2/HSPB1/GSN/CASP7/F2R/FAS/ANXA1/SOD2/GSTM1/SAT1/CLU/PLAT/BTG3/MCL1/RHOB/GADD45A/TGFB2/TNF/DAP/BGN/CDK2/IFNGR1/BCL2L11/CD69/IL1B/ATF3/RELA
HALLMARK_COAGULATION	HALLMARK_COAGULATION	COAGULATION	136	0.56612	2.13635	1.51312e-09	5.81968e-09	2.57291e-09	2911	tags=37%, list=13%, signal=32%	SERPINA1/F9/C1QA/ITGB3/F3/C3/MMP9/CFI/PECAM1/C1R/ANG/TIMP1/THBD/CFB/VWF/APOC2/TIMP3/SPARC/CSRP1/GNG12/CFH/MMP2/GSN/C1S/CD9/ACOX2/ANXA1/SERPING1/HTRA1/FN1/MAFF/CLU/PLAT/CAPN2/LAMP2/MST1/RAPGEF3/CTSH/TFPI2/C2/S100A1/MEP1A/CTSO/SERPINE1/S100A13/PROC/MMP14/LEFTY2/PROS1/BMP1
HALLMARK_KRAS_SIGNALING_UP	HALLMARK_KRAS_SIGNALING_UP	KRAS_SIGNALING_UP	193	0.49002	1.91999	1.11686e-07	3.9888e-07	1.76347e-07	2414	tags=27%, list=11%, signal=25%	SERPINA3/ANGPTL4/EMP1/CXCL10/TMEM176B/RETN/SPON1/TMEM176A/SOX9/MMP9/USH1C/PECAM1/LCP1/CFB/ANXA10/SPP1/LAT2/APOD/F2RL1/LAPTM5/SLPI/FCER1G/PLAUR/CFH/ITGB2/TFPI/PSMB8/GADD45G/TNFAIP3/TNFRSF1B/MAP4K1/NRP1/TLR8/IGFBP3/MPZL2/TMEM100/JUP/IL33/SEMA3B/PLAT/GPRC5B/CD37/TRAF1/CSF2RA/HKDC1/C3AR1/KLF4/IRF8/RGS16/IL10RA/PLVAP/DOCK2/LIF
HALLMARK_ADIPOGENESIS	HALLMARK_ADIPOGENESIS	ADIPOGENESIS	188	0.46025	1.8023	3.17384e-06	1.05795e-05	4.67723e-06	3666	tags=28%, list=17%, signal=23%	ANGPTL4/RETN/STOM/SLC1A5/RAB34/C3/UCP2/PLIN2/TST/ITIH5/ACADS/ACAA2/FAH/SSPN/CD302/ACADL/HSPB8/ABCA1/ANGPT1/MYLK/CPT2/GPAM/DECR1/APOE/AGPAT3/ORM1/STAT5A/ADIPOR2/LIFR/PHLDB1/COL4A1/ALDH2/LIPE/CAT/GADD45A/ITGA7/CD151/OMD/ARAF/IFNGR1/TOB1/BCL6/SLC25A1/SORBS1/SLC27A1/LPCAT3/ECH1/SLC19A1/ADIPOQ/SCP2/SCARB1/EPHX2
HALLMARK_ESTROGEN_RESPONSE_LATE	HALLMARK_ESTROGEN_RESPONSE_LATE	ESTROGEN_RESPONSE_LATE	192	0.459823	1.80101	4.90614e-06	1.53317e-05	6.77822e-06	1998	tags=26%, list=9%, signal=23%	SERPINA3/S100A9/CD44/TMPRSS3/FKBP5/ZFP36/SFN/SERPINA1/SERPINA5/CA12/MDK/FGFR3/TPD52L1/ISG20/IL17RB/TST/KRT19/SLC16A1/BATF/IMPA2/MYOF/SGK1/SLC26A2/HSPB8/PLXNB1/ADD3/EMP2/RAB31/CD9/ACOX2/CYP4F11/PTPN6/LTF/MICB/PAPSS2/SOX3/ST6GALNAC2/SEMA3B/GINS2/PGR/ELOVL5/BTG3/KIF20A/TFPI2/IL6ST/WFS1/SCNN1A/PERP/KLF4
HALLMARK_XENOBIOTIC_METABOLISM	HALLMARK_XENOBIOTIC_METABOLISM	XENOBIOTIC_METABOLISM	195	0.441378	1.73028	2.90176e-05	8.53458e-05	3.77318e-05	4156	tags=35%, list=19%, signal=29%	FABP1/PDK4/TMEM176B/SLC1A5/MT2A/HMOX1/ATOH8/CFB/EPHX1/CCL25/CASP6/IL1R1/TNFRSF1A/EPHA2/FAH/SMOX/CDA/PDLIM5/NQO1/ACOX2/DDAH2/APOE/FAS/JUP/PAPSS2/MAOA/AKR1C3/GNMT/LCAT/FBLN1/ALDH2/ALDH9A1/ELOVL5/COMT/SLC12A4/CYP2J2/CAT/TGFB2/CYP27A1/PTGDS/SERPINE1/IRF8/ABCC2/BCAR1/ACSM1/UPP1/VNN1/FBP1/CES1/ALDH3A1/PROS1/TPST1/NPC1/ECH1/DCXR/SAR1B/SSR3/TMBIM6/CBR1/ETFDH/UPB1/GSTT2/NINJ1/IGFBP4/IGFBP1/TAT/GSTM4/GCNT2
HALLMARK_MYOGENESIS	HALLMARK_MYOGENESIS	MYOGENESIS	197	0.416329	1.63387	0.000254488	0.000706911	0.000312529	4153	tags=37%, list=19%, signal=30%	ITGB4/APLNR/TAGLN/MYL3/TPD52L1/SOD3/TPM2/PGAM2/PDLIM7/FXYD1/APOD/IGFBP7/MYH11/DES/CNN3/SPARC/TGFB1/SSPN/CDKN1A/WWTR1/GADD45B/HSPB8/GJA5/DTNA/TEAD4/MYOZ1/MYLK/GSN/NQO1/SMTN/COL4A2/IGFBP3/ITGB5/CRYAB/CKMT2/AEBP1/CTF1/SYNGR2/CLU/PLXNB2/RYR1/CASQ2/MYBPH/ITGA7/COL1A1/COL6A3/SLC6A8/SGCA/NOTCH1/CSRP3/MYOM1/EFS/SORBS1/COL3A1/TCAP/ACSL1/PYGM/DMD/SORBS3/DMPK/FGF2/GPX3/MYH9/ADAM12/CACNG1/BIN1/MYL2/SIRT2/ERB…
HALLMARK_ESTROGEN_RESPONSE_EARLY	HALLMARK_ESTROGEN_RESPONSE_EARLY	ESTROGEN_RESPONSE_EARLY	192	0.413257	1.61862	0.000323412	0.000851084	0.000376269	2371	tags=24%, list=11%, signal=22%	CD44/TMPRSS3/FKBP5/GJA1/SFN/SLC7A2/CA12/MUC1/ELOVL2/TUBB2B/TGM2/TPD52L1/IL17RB/RHOBTB3/RHOD/KRT19/LRIG1/SLC16A1/P2RY2/INHBB/MYOF/SLC26A2/HSPB8/ELF1/DHRS3/TIPARP/ADD3/RAB31/MICB/TSKU/PAPSS2/MYC/SOX3/SEMA3B/PGR/ELOVL5/IL6ST/PODXL/WFS1/SCNN1A/SLC2A1/KLF4/SEC14L2/ENDOD1/PDLIM3/TOB1
HALLMARK_APICAL_JUNCTION	HALLMARK_APICAL_JUNCTION	APICAL_JUNCTION	192	0.396273	1.5521	0.00119285	0.00298214	0.00131842	3608	tags=29%, list=16%, signal=25%	ITGB4/TNFRSF11B/ACTG2/ICAM1/MMP9/CD99/PECAM1/MDK/CLDN5/VWF/NRTN/CNN2/MSN/ICAM2/EGFR/MMP2/SYK/RAC2/MYL9/BAIAP2/ITGA10/MPZL2/TGFBI/JUP/CLDN14/NEXN/TRAF1/CLDN11/ALOX15B/VCAM1/VCAN/CD86/PTPRC/RRAS/GNAI2/ARHGEF6/CDSN/CERCAM/CALB2/CLDN18/ADAM15/FLNC/VASP/B4GALT1/RSU1/TJP1/BMP1/SHC1/CDH3/INPPL1/LDLRAP1/EPB41L2/CTNNA1/SORBS3/LIMA1/AMH
HALLMARK_ANDROGEN_RESPONSE	HALLMARK_ANDROGEN_RESPONSE	ANDROGEN_RESPONSE	97	0.446956	1.59941	0.00202306	0.00481681	0.00212954	3992	tags=32%, list=18%, signal=26%	FKBP5/KRT19/BMPR1B/SGK1/SLC26A2/PDLIM5/AZGP1/MYL12A/NDRG1/B2M/ADAMTS1/LIFR/ITGAV/SAT1/ELOVL5/ABCC4/GNAI3/MAK/DBI/CDC14B/TNFAIP8/FADS1/B4GALT1/LMAN1/SRP19/MERTK/PTK2B/PTPN21/PGM3/ZBTB10/TARP
HALLMARK_BILE_ACID_METABOLISM	HALLMARK_BILE_ACID_METABOLISM	BILE_ACID_METABOLISM	112	0.419059	1.5427	0.00339614	0.0077185	0.00341239	3749	tags=31%, list=17%, signal=26%	TFCP2L1/ACSL5/BBOX1/ABCA6/ABCD3/ABCA1/HSD17B6/GNMT/HSD3B7/FADS2/AMACR/ALDH9A1/LIPE/CAT/CYP27A1/RXRG/RBP1/ALDH1A1/BCAR3/TTR/FADS1/ABCD1/IDH2/ABCA9/CYP7B1/NPC1/PEX11G/NEDD4/ACSL1/PEX11A/SCP2/EPHX2/ABCA2/RXRA/PIPOX
HALLMARK_FATTY_ACID_METABOLISM	HALLMARK_FATTY_ACID_METABOLISM	FATTY_ACID_METABOLISM	154	0.367247	1.4048	0.0112063	0.0243614	0.0107703	4072	tags=30%, list=18%, signal=25%	FABP1/XIST/ACSL5/EPHX1/ACADS/ACAA2/S100A10/BMPR1B/GLUL/ACADL/HSDL2/BCKDHB/CPT2/SUCLG2/IL4I1/CPT1A/DECR1/ADIPOR2/MAOA/HADHB/ECI2/AQP7/AOC3/ALDH9A1/ELOVL5/ACADVL/PRDX6/ALDH1A1/HSD17B10/UBE2L6/CBR3/VNN1/ALDH3A1/GCDH/EHHADH/ECH1/ACSL1/PPARA/CBR1/ETFDH/SLC22A5/HMGCL/ACAA1/CPOX/ODC1/INMT
HALLMARK_HEME_METABOLISM	HALLMARK_HEME_METABOLISM	HEME_METABOLISM	191	0.358973	1.40572	0.0120681	0.0251419	0.0111154	2703	tags=19%, list=12%, signal=17%	E2F2/ALDH1L1/LRP10/C3/KEL/UCP2/NFE2/EPB41/TNS1/SMOX/ALAS2/SELENBP1/BTG2/AHSP/SLC7A11/HBD/KAT2B/HBB/ALDH6A1/MOCOS/SEC14L1/PDZK1IP1/SLC30A10/LAMP2/SLC30A1/ACP5/CAT/RHCE/SLC2A1/CA1/ENDOD1/SLC6A9/SLC6A8/KHNYN/RCL1/FTCD/BACH1
HALLMARK_UV_RESPONSE_DN	HALLMARK_UV_RESPONSE_DN	UV_RESPONSE_DN	138	0.378057	1.42624	0.0134138	0.0268276	0.0118606	2202	tags=19%, list=10%, signal=17%	GJA1/EFEMP1/ITGB3/F3/MT1E/ANXA2/ADORA2B/TGFBR3/ERBB2/NOTCH2/RBPMS/TFPI/LTBP1/PDLIM5/PMP22/BCKDHB/NRP1/ADD3/MYC/TGFBR2/IGFBP5/SERPINE1/COL1A1/RUNX1/ID1/SRI
HALLMARK_ANGIOGENESIS	HALLMARK_ANGIOGENESIS	ANGIOGENESIS	36	0.509817	1.57455	0.0148421	0.0285424	0.0126188	3179	tags=33%, list=14%, signal=29%	SERPINA5/TIMP1/THBD/SPP1/NRP1/FSTL1/ITGAV/MSX1/VCAN/PRG2/S100A4/COL3A1
HALLMARK_TGF_BETA_SIGNALING	HALLMARK_TGF_BETA_SIGNALING	TGF_BETA_SIGNALING	54	0.477203	1.57569	0.0157308	0.0291311	0.012879	4427	tags=35%, list=20%, signal=28%	LTBP2/TGIF1/ID3/TGFB1/WWTR1/RAB31/TGFBR1/HDAC1/CDKN1C/SERPINE1/ID1/BCAR3/LEFTY2/TJP1/SMAD1/HIPK2/THBS1/SPTBN1/SMURF2
HALLMARK_UV_RESPONSE_UP	HALLMARK_UV_RESPONSE_UP	UV_RESPONSE_UP	150	0.365073	1.39073	0.0190146	0.0339546	0.0150115	2826	tags=22%, list=13%, signal=19%	CXCL2/ICAM1/IL6/HMOX1/TST/IRF1/EPHX1/HYAL2/TAP1/LYN/BTG2/APOM/NFKBIA/CHKA/HSPA2/MAOA/HLA-F/SOD2/BTG3/IL6ST/RHOB/CDKN1C/MSX1/RAB27A/NAT1/CDK2/BCL2L11/SLC6A8/PDLIM3/COL2A1/ATF3/MMP14/BTG1
