# Supplementary material
Source: Research Square preprint supplement (doi:10.21203/rs.3.rs-9288348/v1)
Supplement: Supplementary file 2 [file 3f4c161a91a967bfc9ec4c0b.xlsx]

## Sheet: Sheet1
Table S6: Binding Energies of Candidate Drugs from Molecular Docking
Drug_Name	Binding_Enerqy
Atorvastatin	-3.89
Candesartan	-6.09
Dexamethasone	-6.01
Methylprednisolone	-5.96
N-Acetyl-L-cysteine	-3.77
Rosiglitazone	-4.95
Rosuvastatin	-5
Simvastatin	-6.5
