# Supplementary material
Source: Research Square preprint supplement (doi:10.21203/rs.3.rs-9288348/v1)
Supplement: Supplementary file 3 [file 7894fcfbd1f0c14af91ede73.xlsx]

## Sheet: DSigDB_table
Table S5: Screening results of potential TLR4-targeting drugs via the Drug Signatures Database
Term	P-value	Adjusted P-value	Old P-value	Old Adjusted P-value	Odds Ratio	Combined Score	Genes
Tetradecanoic acid TTD 00011406	5.999842544083076E-4	0.012086035704058938	0	0	19988	148283.11962915692	TLR4
methadone CTD 00006284	8.499797390404818E-4	0.012086035704058938	0	0	19983	141285.76583697114	TLR4
alvespimycin CTD 00004027	8.999788927950273E-4	0.012086035704058938	0	0	19982	140136.54844084635	TLR4
benazepril CTD 00002009	9.4997806231055E-4	0.012086035704058938	0	0	19981	139049.2109571672	TLR4
AFLATOXIN G1 BOSS	9.999772468562472E-4	0.012086035704058938	0	0	19980	138017.40508704726	TLR4
maltotetraose BOSS	0.0010499764455398322	0.012086035704058938	0	0	19979	137035.71221916509	TLR4
24939-16-0 CTD 00001660	0.001099975657412352	0.012086035704058938	0	0	19978	136099.47030191717	TLR4
Muramyl Dipeptide CTD 00005307	0.001099975657412352	0.012086035704058938	0	0	19978	136099.47030191717	TLR4
Adenylyl sulfate BOSS	0.0011999741185782279	0.012086035704058938	0	0	19976	134347.69487847842	TLR4
Bonuten CTD 00005895	0.0011999741185782279	0.012086035704058938	0	0	19976	134347.69487847842	TLR4
naloxone CTD 00006373	0.001249973366379199	0.012086035704058938	0	0	19975	133525.54486996148	TLR4
THIOACETAMIDE BOSS	0.0013499718942362672	0.012086035704058938	0	0	19973	131975.02298599784	TLR4
DEXMEDETOMIDINE BOSS	0.0013499718942362672	0.012086035704058938	0	0	19973	131975.02298599784	TLR4
Dienogest CTD 00001099	0.0013499718942362672	0.012086035704058938	0	0	19973	131975.02298599784	TLR4
STREPTOZOTOCIN CTD 00006786	0.0013999711732997815	0.012086035704058938	0	0	19972	131242.0761597353	TLR4
Vinzam BOSS	0.0014499704617910874	0.012086035704058938	0	0	19971	130534.69172799007	TLR4
IMIQUIMOD BOSS	0.0014499704617910874	0.012086035704058938	0	0	19971	130534.69172799007	TLR4
stearic acid BOSS	0.0014999697593334861	0.012086035704058938	0	0	19970	129851.13732048514	TLR4
6-Deoxy-D-galactose BOSS	0.001649967703211374	0.012086035704058938	0	0	19967	127928.56031580272	TLR4
adenosine CTD 00005319	0.0017999657178272253	0.012086035704058938	0	0	19964	126172.23364250173	TLR4
candesartan BOSS	0.0017999657178272253	0.012086035704058938	0	0	19964	126172.23364250173	TLR4
AZOXYMETHANE BOSS	0.0017999657178272253	0.012086035704058938	0	0	19964	126172.23364250173	TLR4
uric acid BOSS	0.0018999644296350071	0.012086035704058938	0	0	19962	125080.29732025368	TLR4
CHLOROGENIC ACID BOSS	0.001999963168059245	0.012086035704058938	0	0	19960	124043.94523066044	TLR4
N-Formyl-Met-Leu-Phe BOSS	0.002099961931127267	0.012086035704058938	0	0	19958	123057.75613441122	TLR4
Telmisartan CTD 00003021	0.002099961931127267	0.012086035704058938	0	0	19958	123057.75613441122	TLR4
levamisole BOSS	0.0021499613216957388	0.012086035704058938	0	0	19957	122581.98940490963	TLR4
Lysergide BOSS	0.002199960717942337	0.012086035704058938	0	0	19956	122117.06559109333	TLR4
Toluidine Blue O BOSS	0.002249960119709436	0.012086035704058938	0	0	19955	121662.49782449215	TLR4
Inosinic acid BOSS	0.0022999595269283277	0.012086035704058938	0	0	19954	121217.83133114419	TLR4
betulinic acid HL60 DOWN	0.002349958939238154	0.012086035704058938	0	0	19953	120782.64067395544	TLR4
OZONE BOSS	0.002399958356798814	0.012086035704058938	0	0	19952	120356.5272753826	TLR4
Platelet activating factor BOSS	0.0024499577795033273	0.012086035704058938	0	0	19951	119939.11720871141	TLR4
methacholine BOSS	0.002499957206903733	0.012086035704058938	0	0	19950	119530.05920663517	TLR4
isoetarine HL60 UP	0.0025999560757154674	0.012086035704058938	0	0	19948	118735.69700320113	TLR4
Rosuvastatin BOSS	0.0027499544131125635	0.012086035704058938	0	0	19945	117599.1294878737	TLR4
N-NITROSODIETHYLAMINE BOSS	0.0027499544131125635	0.012086035704058938	0	0	19945	117599.1294878737	TLR4
(3s)-3-Cyclopentyl-6-Methyl-7-[(4-Methylpiperazin-1-Yl)sulfonyl]-3,4-Dihydro-2h-1,2,4-Benzothiadiazine 1,1-Dioxide BOSS	0.002849953326298048	0.012086035704058938	0	0	19943	116875.00742975442	TLR4
NICKEL BOSS	0.0028999527887707257	0.012086035704058938	0	0	19942	116522.31890946148	TLR4
3-methyladenine BOSS	0.0029499522555206784	0.012086035704058938	0	0	19941	116175.59385530633	TLR4
Cephalochromin TTD 00002771	0.002999951725986083	0.012086035704058938	0	0	19940	115834.63209072244	TLR4
ALUMINUM BOSS	0.0030499512001654393	0.012086035704058938	0	0	19939	115499.24335773686	TLR4
ionomycin BOSS	0.003199949645554796	0.012086035704058938	0	0	19936	114524.7484081637	TLR4
MINOCYCLINE HYDROCHLORIDE BOSS	0.003199949645554796	0.012086035704058938	0	0	19936	114524.7484081637	TLR4
Naloxone hydrochloride BOSS	0.0032499491344070543	0.012086035704058938	0	0	19935	114209.92613860143	TLR4
SODIUM SULFATE BOSS	0.0032499491344070543	0.012086035704058938	0	0	19935	114209.92613860143	TLR4
FITC BOSS	0.003349948122491222	0.012086035704058938	0	0	19933	113594.38808369274	TLR4
propofol BOSS	0.003749944204112533	0.012086035704058938	0	0	19925	111301.33528642564	TLR4
methylprednisolone BOSS	0.003749944204112533	0.012086035704058938	0	0	19925	111301.33528642564	TLR4
epoprostenol BOSS	0.003799943728175252	0.012086035704058938	0	0	19924	111031.8499691117	TLR4
mifepristone BOSS	0.0038999427840466197	0.012086035704058938	0	0	19922	110503.2180492851	TLR4
warfarin BOSS	0.003949942316733739	0.012086035704058938	0	0	19921	110243.89578070647	TLR4
morphine CTD 00006352	0.003949942316733739	0.012086035704058938	0	0	19921	110243.89578070647	TLR4
berberine BOSS	0.003949942316733739	0.012086035704058938	0	0	19921	110243.89578070647	TLR4
CARBON TETRACHLORIDE BOSS	0.0039999418516560555	0.012086035704058938	0	0	19920	109987.79106467364	TLR4
bay 11-7082 CTD 00003959	0.004149940472691877	0.012086035704058938	0	0	19917	109237.99888847338	TLR4
phenol BOSS	0.004149940472691877	0.012086035704058938	0	0	19917	109237.99888847338	TLR4
172889-27-9 BOSS	0.004199940018450607	0.012086035704058938	0	0	19916	108993.9951593718	TLR4
curcumin TTD 00007338	0.004249939567045091	0.012086035704058938	0	0	19915	108752.83801948265	TLR4
Isoflavone BOSS	0.004249939567045091	0.012086035704058938	0	0	19915	108752.83801948265	TLR4
retinol CTD 00006991	0.0042999391173866456	0.012086035704058938	0	0	19914	108514.46102290177	TLR4
Spectrum 001666 CTD 00000796	0.0042999391173866456	0.012086035704058938	0	0	19914	108514.46102290177	TLR4
Heparitin BOSS	0.004499937343976261	0.012086035704058938	0	0	19910	107587.50385474482	TLR4
Eicosapentaenoic acid BOSS	0.0045499369072032085	0.012086035704058938	0	0	19909	107362.10783923086	TLR4
luteolin BOSS	0.004799934753870669	0.012086035704058938	0	0	19904	106270.50039849174	TLR4
carbon monoxide BOSS	0.004799934753870669	0.012086035704058938	0	0	19904	106270.50039849174	TLR4
beta-D-allopyranose BOSS	0.004849934330470697	0.012086035704058938	0	0	19903	106058.9096435903	TLR4
hydrocortisone CTD 00006117	0.004849934330470697	0.012086035704058938	0	0	19903	106058.9096435903	TLR4
Omega-3 Fatty Acids BOSS	0.004899933908107966	0.012086035704058938	0	0	19902	105849.45495286949	TLR4
chloroquine BOSS	0.004899933908107966	0.012086035704058938	0	0	19902	105849.45495286949	TLR4
ACMC-20mvek CTD 00002629	0.004999933071055651	0.012086035704058938	0	0	19900	105436.78197328729	TLR4
TITANIUM BOSS	0.004999933071055651	0.012086035704058938	0	0	19900	105436.78197328729	TLR4
Hydroxyzine dihydrochloride BOSS	0.004999933071055651	0.012086035704058938	0	0	19900	105436.78197328729	TLR4
D-Sorbitol BOSS	0.004999933071055651	0.012086035704058938	0	0	19900	105436.78197328729	TLR4
losartan BOSS	0.0050999322416682095	0.012086035704058938	0	0	19898	105032.15064717118	TLR4
cholecalciferol CTD 00005655	0.005199931420299767	0.012086035704058938	0	0	19896	104635.24941415618	TLR4
L-arginine BOSS	0.00524993101296176	0.012086035704058938	0	0	19895	104439.60512106394	TLR4
butyric acid BOSS	0.0054999290027479076	0.012086035704058938	0	0	19890	103488.06969787035	TLR4
beta-Levulose BOSS	0.0055999282120529755	0.012086035704058938	0	0	19888	103119.30984392198	TLR4
Healon BOSS	0.005749927038586192	0.012086035704058938	0	0	19885	102578.1269308809	TLR4
acetaldehyde BOSS	0.005849926265395889	0.012086035704058938	0	0	19883	102224.98927249596	TLR4
INDOMETHACIN SODIUM BOSS	0.005949925498513741	0.012086035704058938	0	0	19881	101877.73080211312	TLR4
Nandrolone phenpropionate BOSS	0.005949925498513741	0.012086035704058938	0	0	19881	101877.73080211312	TLR4
Oxotremorine BOSS	0.006399922128145933	0.012086035704058938	0	0	19872	100382.80103296519	TLR4
alpha-GalNAc BOSS	0.006399922128145933	0.012086035704058938	0	0	19872	100382.80103296519	TLR4
rosiglitazone BOSS	0.006449921761047041	0.012086035704058938	0	0	19871	100223.10990746199	TLR4
trichostatin A BOSS	0.006449921761047041	0.012086035704058938	0	0	19871	100223.10990746199	TLR4
lorazepam BOSS	0.006449921761047041	0.012086035704058938	0	0	19871	100223.10990746199	TLR4
Docosahexaenoic acid BOSS	0.006549921031660341	0.012086035704058938	0	0	19869	99907.33811343512	TLR4
Agarose BOSS	0.0066499203093911404	0.012086035704058938	0	0	19867	99596.2591544721	TLR4
isoproterenol BOSS	0.0066499203093911404	0.012086035704058938	0	0	19867	99596.2591544721	TLR4
tacrolimus BOSS	0.0066499203093911404	0.012086035704058938	0	0	19867	99596.2591544721	TLR4
Adenosine triphosphate BOSS	0.006699919949774208	0.012086035704058938	0	0	19866	99442.43560916923	TLR4
9001-31-4 BOSS	0.006749919591983201	0.012086035704058938	0	0	19865	99289.7333966756	TLR4
retinol BOSS	0.006749919591983201	0.012086035704058938	0	0	19865	99289.7333966756	TLR4
glutathione CTD 00006035	0.00679991923461567	0.012086035704058938	0	0	19864	99138.13602465816	TLR4
genistein BOSS	0.007149916777044232	0.012086035704058938	0	0	19857	98106.57763600958	TLR4
Deacetylchitin BOSS	0.007149916777044232	0.012086035704058938	0	0	19857	98106.57763600958	TLR4
atorvastatin BOSS	0.007149916777044232	0.012086035704058938	0	0	19857	98106.57763600958	TLR4
CHROMIUM CTD 00005668	0.007399915061391008	0.012086035704058938	0	0	19852	97399.60470052566	TLR4
carisoprodol BOSS	0.007799912380841398	0.012086035704058938	0	0	19844	96315.68729804519	TLR4
oleic acid BOSS	0.00794991139541168	0.012086035704058938	0	0	19841	95923.18938738292	TLR4
eugenol CTD 00005949	0.008049910744704642	0.012086035704058938	0	0	19839	95665.52832623763	TLR4
nitroglycerin BOSS	0.008099910420261848	0.012086035704058938	0	0	19838	95537.86936302872	TLR4
cinnamaldehyde CTD 00000671	0.008249909455347768	0.012086035704058938	0	0	19835	95159.46482222488	TLR4
Estrone sulfate BOSS	0.0083499088182494	0.012086035704058938	0	0	19833	94910.91392473764	TLR4
acetaminophen BOSS	0.0083499088182494	0.012086035704058938	0	0	19833	94910.91392473764	TLR4
DL-METHIONINE BOSS	0.0083499088182494	0.012086035704058938	0	0	19833	94910.91392473764	TLR4
diphenylpyraline BOSS	0.008399908501109525	0.012086035704058938	0	0	19832	94787.72752807094	TLR4
bicalutamide CTD 00002279	0.00849990786928235	0.012086035704058938	0	0	19830	94543.49009679438	TLR4
morphine BOSS	0.008599907242820785	0.012086035704058938	0	0	19828	94302.04456580919	TLR4
midecamycin HL60 UP	0.008799906001252198	0.012086035704058938	0	0	19824	93827.2742785136	TLR4
palmitic acid BOSS	0.008849905692612275	0.012086035704058938	0	0	19823	93710.22884413046	TLR4
dimethyl sulfoxide BOSS	0.008849905692612275	0.012086035704058938	0	0	19823	93710.22884413046	TLR4
dUTP BOSS	0.008949905080056155	0.012086035704058938	0	0	19821	93478.0629355712	TLR4
histamine BOSS	0.008999904774535104	0.012086035704058938	0	0	19820	93362.92821536642	TLR4
CORTICOSTERONE BOSS	0.008999904774535104	0.012086035704058938	0	0	19820	93362.92821536642	TLR4
hydrogen sulfide BOSS	0.009049904470786355	0.012086035704058938	0	0	19819	93248.41634586031	TLR4
hemin BOSS	0.009049904470786355	0.012086035704058938	0	0	19819	93248.41634586031	TLR4
bilirubin BOSS	0.009099904167512541	0.012086035704058938	0	0	19818	93134.5204969738	TLR4
maltotriose BOSS	0.009099904167512541	0.012086035704058938	0	0	19818	93134.5204969738	TLR4
PROPIDIUM BOSS	0.009099904167512541	0.012086035704058938	0	0	19818	93134.5204969738	TLR4
methotrexate BOSS	0.009099904167512541	0.012086035704058938	0	0	19818	93134.5204969738	TLR4
Melatonin BOSS	0.009199903564844769	0.012086035704058938	0	0	19816	92908.5500823036	TLR4
ellagic acid BOSS	0.009199903564844769	0.012086035704058938	0	0	19816	92908.5500823036	TLR4
IRON BOSS	0.009249903264591769	0.012086035704058938	0	0	19815	92796.46240359118	TLR4
sucrose BOSS	0.009249903264591769	0.012086035704058938	0	0	19815	92796.46240359118	TLR4
L-cysteine BOSS	0.00929990296513577	0.012086035704058938	0	0	19814	92684.96451050609	TLR4
formic acid BOSS	0.00929990296513577	0.012086035704058938	0	0	19814	92684.96451050609	TLR4
Ethylparaben BOSS	0.00929990296513577	0.012086035704058938	0	0	19814	92684.96451050609	TLR4
lactic acid BOSS	0.00929990296513577	0.012086035704058938	0	0	19814	92684.96451050609	TLR4
L-alanine BOSS	0.00929990296513577	0.012086035704058938	0	0	19814	92684.96451050609	TLR4
ethanol BOSS	0.009349902667436013	0.012086035704058938	0	0	19813	92574.05010507847	TLR4
17-Hydroxyandrostan-3-one CTD 00006776	0.009349902667436013	0.012086035704058938	0	0	19813	92574.05010507847	TLR4
acetic acid BOSS	0.009349902667436013	0.012086035704058938	0	0	19813	92574.05010507847	TLR4
sodium chloride BOSS	0.009349902667436013	0.012086035704058938	0	0	19813	92574.05010507847	TLR4
D-glucose BOSS	0.009399902370135061	0.012086035704058938	0	0	19812	92463.712994847	TLR4
GLYCOPROTEIN BOSS	0.00944990207385358	0.012086035704058938	0	0	19811	92353.94708159096	TLR4
Superoxide BOSS	0.00944990207385358	0.012086035704058938	0	0	19811	92353.94708159096	TLR4
hydrogen peroxide BOSS	0.00944990207385358	0.012086035704058938	0	0	19811	92353.94708159096	TLR4
D-Norepinephrine d-bitartrate BOSS	0.009499901779199581	0.012086035704058938	0	0	19810	92244.74636351672	TLR4
HEXACHLOROETHANE BOSS	0.009499901779199581	0.012086035704058938	0	0	19810	92244.74636351672	TLR4
cholesterol BOSS	0.009499901779199581	0.012086035704058938	0	0	19810	92244.74636351672	TLR4
glutathione BOSS	0.009499901779199581	0.012086035704058938	0	0	19810	92244.74636351672	TLR4
L-glutamine BOSS	0.009499901779199581	0.012086035704058938	0	0	19810	92244.74636351672	TLR4
Insulin BOSS	0.009549901484107151	0.012086035704058938	0	0	19809	92136.10493875458	TLR4
AGN-PC-0JHFVD BOSS	0.009549901484107151	0.012086035704058938	0	0	19809	92136.10493875458	TLR4
serine BOSS	0.009549901484107151	0.012086035704058938	0	0	19809	92136.10493875458	TLR4
streptozocin BOSS	0.009549901484107151	0.012086035704058938	0	0	19809	92136.10493875458	TLR4
nitric oxide BOSS	0.009549901484107151	0.012086035704058938	0	0	19809	92136.10493875458	TLR4
N-Acetyl-L-cysteine BOSS	0.009549901484107151	0.012086035704058938	0	0	19809	92136.10493875458	TLR4
trimethoprim BOSS	0.009549901484107151	0.012086035704058938	0	0	19809	92136.10493875458	TLR4
Phetharbital BOSS	0.009599901191111601	0.012086035704058938	0	0	19808	92028.0169882316	TLR4
cyclosporin A BOSS	0.009599901191111601	0.012086035704058938	0	0	19808	92028.0169882316	TLR4
Isoguanine BOSS	0.009599901191111601	0.012086035704058938	0	0	19808	92028.0169882316	TLR4
1-Phosphatidyl-myo-inositol BOSS	0.009599901191111601	0.012086035704058938	0	0	19808	92028.0169882316	TLR4
Angiotensin II, human BOSS	0.009649900897259636	0.012086035704058938	0	0	19807	91920.47679471427	TLR4
ethisterone BOSS	0.009649900897259636	0.012086035704058938	0	0	19807	91920.47679471427	TLR4
DICHLOROMETHANE BOSS	0.009649900897259636	0.012086035704058938	0	0	19807	91920.47679471427	TLR4
cerivastatin BOSS	0.009649900897259636	0.012086035704058938	0	0	19807	91920.47679471427	TLR4
Simvastatin and niacin BOSS	0.009649900897259636	0.012086035704058938	0	0	19807	91920.47679471427	TLR4
17-Hydroxy-17-methylandrost-4-en-3-one BOSS	0.009699900606962433	0.012086035704058938	0	0	19806	91813.47871439937	TLR4
Aizen uranine BOSS	0.009699900606962433	0.012086035704058938	0	0	19806	91813.47871439937	TLR4
PIPERONYL BUTOXIDE BOSS	0.009699900606962433	0.012086035704058938	0	0	19806	91813.47871439937	TLR4
UNII-CXY7B3Q98Z BOSS	0.00974990031449891	0.012086035704058938	0	0	19805	91707.0172110273	TLR4
Dinoprostone BOSS	0.009799900025584465	0.012086035704058938	0	0	19804	91601.08680998597	TLR4
2-Butanone BOSS	0.009799900025584465	0.012086035704058938	0	0	19804	91601.08680998597	TLR4
water BOSS	0.009799900025584465	0.012086035704058938	0	0	19804	91601.08680998597	TLR4
11-cis-Retinal BOSS	0.009849899736522881	0.012086035704058938	0	0	19803	91495.68213909514	TLR4
LAMININ BOSS	0.009849899736522881	0.012086035704058938	0	0	19803	91495.68213909514	TLR4
Acid red 87 BOSS	0.009899899448881415	0.012086035704058938	0	0	19802	91390.79789707912	TLR4
hydrocortisone BOSS	0.009899899448881415	0.012086035704058938	0	0	19802	91390.79789707912	TLR4
Bisulfite BOSS	0.009899899448881415	0.012086035704058938	0	0	19802	91390.79789707912	TLR4
cyclophosphamide BOSS	0.009899899448881415	0.012086035704058938	0	0	19802	91390.79789707912	TLR4
Acetylcholine bromide BOSS	0.009899899448881415	0.012086035704058938	0	0	19802	91390.79789707912	TLR4
rapamycin BOSS	0.009899899448881415	0.012086035704058938	0	0	19802	91390.79789707912	TLR4
alprazolam BOSS	0.009949899161015963	0.012086035704058938	0	0	19801	91286.4288690606	TLR4
Capsaicin BOSS	0.010099898303912546	0.01212348930225331	0	0	19798	90976.36203743407	TLR4
dexamethasone BOSS	0.010099898303912546	0.01212348930225331	0	0	19798	90976.36203743407	TLR4
Vitamin D3 BOSS	0.010149898020491144	0.01212348930225331	0	0	19797	90874.00321672155	TLR4
epinephrine BOSS	0.010349896893662402	0.01229407642064871	0	0	19793	90469.42323040124	TLR4
(-)-Epigallocatechin gallate BOSS	0.010599895502625587	0.01252185457727748	0	0	19788	89974.27756224656	TLR4
oxyphenbutazone BOSS	0.010849894132210542	0.01274714337937304	0	0	19783	89490.37793831626	TLR4
progesterone BOSS	0.01104989304922977	0.012911559812958698	0	0	19779	89111.0116662582	TLR4
resveratrol BOSS	0.011249891979033914	0.013074198786444818	0	0	19775	88738.27077557483	TLR4
3,3',4,4',5-Pentachlorobiphenyl CTD 00001077	0.011849888838026198	0.013697452151481897	0	0	19763	87657.53732429365	TLR4
quinpirole HL60 UP	0.012249886798560013	0.01408409444754226	0	0	19755	86966.22320653235	TLR4
HEMATOXYLIN BOSS	0.012549885297699227	0.014352262441517731	0	0	19749	86461.98607941243	TLR4
curcumin BOSS	0.01284988381971255	0.014617592704964015	0	0	19743	85969.32410818576	TLR4
puromycin HL60 UP	0.013699879751690527	0.015421330610541692	0	0	19726	84631.80357548757	TLR4
2-Nonenal, 4-hydroxy-, (2E,4R)- CTD 00001295	0.013699879751690527	0.015421330610541692	0	0	19726	84631.80357548757	TLR4
melphalan CTD 00006262	0.013949878586794216	0.01562095779250394	0	0	19721	84253.72211586089	TLR4
helveticoside HL60 UP	0.015049873627526019	0.01676540326382432	0	0	19699	82664.60160220857	TLR4
simvastatin CTD 00007319	0.015199872970492063	0.016845220044617495	0	0	19696	82456.67783204168	TLR4
N-Acetyl-L-cysteine CTD 00005305	0.015749870598813717	0.01736524194228179	0	0	19685	81710.92180799847	TLR4
dexamethasone CTD 00005779	0.02104985038164686	0.023090397102316706	0	0	19579	75591.8137037699	TLR4
deptropine HL60 DOWN	0.02174984801377362	0.0237371437713773	0	0	19565	74897.72558532194	TLR4
curcumin CTD 00000663	0.026399833720029624	0.02866648611013318	0	0	19472	70768.98943111653	TLR4
methotrexate CTD 00006299	0.030949821747537833	0.03343824962673685	0	0	19381	67356.49558844932	TLR4
cephaeline HL60 UP	0.038349805537432835	0.041226040952740295	0	0	19233	62718.9249728642	TLR4
ARSENIC CTD 00005442	0.04264979759694143	0.045620430265385106	0	0	19147	60403.667978249796	TLR4
lycorine HL60 UP	0.04309979682459531	0.04587354612518808	0	0	19138	60174.40762810946	TLR4
Demecolcine CTD 00005762	0.04379979563336754	0.046266941298040105	0	0	19124	59822.284062605904	TLR4
Bortezomib CTD 00003736	0.04389979546418689	0.046266941298040105	0	0	19122	59772.419908199205	TLR4
