# Supplementary material
Source: Research Square preprint supplement (doi:10.21203/rs.3.rs-9288348/v1)
Supplement: Supplementary file 4 [file 9845a8c94991e56f8d1819bf.xlsx]

## Sheet: Table S2
Table S2: Gene Set Enrichment Analysis (GSEA) of hippocampal RNA-seq data from BDL (n = 5) versus sham (n = 5) mice using the M5 collection.
	ID	Description	setSize	enrichmentScore	NES	pvalue	p.adjust	qvalue	rank	leading_edge	core_enrichment
GOBP_CELL_PROJECTION_ORGANIZATION	GOBP_CELL_PROJECTION_ORGANIZATION	GOBP_CELL_PROJECTION_ORGANIZATION	1508	-0.313379	-1.54062	9.72387e-12	1.03015e-07	9.65631e-08	3124	tags=24%, list=19%, signal=21%	Mylip/Srf/Spag6l/Enpp2/Dbn1/Map1b/Arhgef6/Eps8/Ntn1/Cyfip1/Llgl1/C2cd3/Arap1/Sh2b1/Prmt1/Ddr2/Actn2/Dzip1/P3h1/Npr2/Nova2/Megf8/Anapc2/Dvl2/Dusp23/Slitrk3/Grin2b/Efnb2/Map4k4/Uhmk1/Lhfpl5/Thy1/Ripor2/Arhgap4/Pard3/Cav1/Spata13/Dscaml1/Rrp7a/Ocln/Ndnf/Sema5b/Cspg5/Ccdc42/Gorasp1/Plk5/Fam161b/Shank3/Ntng2/Erbb2/Lonrf2/Atp1a3/Micall2/Kit/Ablim3/Nfib/Atat1/Manf/Nefl/Tbc1d16/Arpin/Arhgef40/Ccdc96/Pdpn…
GOCC_CILIUM	GOCC_CILIUM	GOCC_CILIUM	785	-0.356047	-1.68575	2.19025e-10	1.16018e-06	1.08752e-06	1987	tags=18%, list=12%, signal=17%	Smad7/Kif19a/Togaram2/Cfap65/Tubb4b/Ift172/Spice1/Adcy5/Nubp1/Crocc/Rpgrip1l/Tuba1a/Rabep2/Cetn2/Tuba1c/Hyls1/Ccdc65/Sema4d/1110017D15Rik/Acly/Ccdc66/Kcnu1/Bbs12/Spef1/Dnah7b/Ttc8/Hspb11/Ush1g/Ehd1/Gpr37l1/Kif9/Dnai2/Cep72/Cfap100/Cdk20/Tekt1/Ppef2/Dynll1/Adcy3/Rsph4a/Micall1/Fuz/Cfap206/Trp73/Tbata/Pacrg/Odad4/Tmem231/Evi2a/Fank1/Gpr161/Robo1/Pdia6/Mcm2/Kcnj10/Gpr83/Slc9a3r1/Cep41/Rd3/Erc1/Spag4…
GOBP_G_PROTEIN_COUPLED_RECEPTOR_SIGNALING_PATHWAY	GOBP_G_PROTEIN_COUPLED_RECEPTOR_SIGNALING_PATHWAY	GOBP_G_PROTEIN_COUPLED_RECEPTOR_SIGNALING_PATHWAY	604	-0.375104	-1.73366	6.6053e-10	2.1002e-06	1.96867e-06	2918	tags=29%, list=18%, signal=24%	Ptger3/Oprm1/Ecrg4/Gpr27/Pard3/Akap13/Celsr1/Cav1/Npr1/Rgs12/Pth1r/Calca/Htr1b/Pdyn/Dgkq/Prkaca/Pnoc/Pdgfrl/Chrm5/Prkca/Sstr1/Chga/Tpra1/Cx3cl1/Opn3/Gna15/Htr7/Plppr4/Ednra/Tshb/Hpgd/Gng7/Gng4/Gnas/Dgkb/Gnal/Ece2/P2ry2/Ptpn6/Phb/Rgs9/Nxph2/Npy5r/Rgs8/Pth2r/Ccl6/Camkmt/Iqgap2/Adcy8/Cntn2/S1pr1/Adcy5/Ramp3/Penk/Rpgrip1l/Rgs20/Adora2a/Mrap2/Grm4/Sorl1/Alk/Pde2a/Rph3al/Trem2/Rgs14/Gprc5b/Prkcg/Plch2/…
GOBP_CENTRAL_NERVOUS_SYSTEM_DEVELOPMENT	GOBP_CENTRAL_NERVOUS_SYSTEM_DEVELOPMENT	GOBP_CENTRAL_NERVOUS_SYSTEM_DEVELOPMENT	924	-0.334479	-1.59763	7.92977e-10	2.1002e-06	1.96867e-06	1951	tags=17%, list=12%, signal=15%	Fgfr1/Atic/Nfasc/Syngr3/Epha4/Ephb1/Cntn2/Ift172/Marcksl1/Otx2/S1pr1/Btbd3/Rpgrip1l/D16Ertd472e/Tuba1a/Adora2a/Alk/Grin2d/Kdm7a/Sez6/Trem2/Plpp3/Zic4/Epha5/Kdm6b/Gap43/Cx3cr1/Ttc8/C3/P2ry12/Itgam/Gpr37l1/Ackr3/Shh/Bcl11b/Slit1/Cdk20/Wnt2b/Cdh11/Fgfr2/Zeb2/Neurod1/Dynll1/Egr2/Plxna4/Cd9/Msx1/Lamb1/Phgdh/Slc32a1/Nkx6-2/Otp/Trp73/Sphk2/Odad4/Slit3/Atf5/Ascl1/Filip1/Abcb6/Ephb2/Olig1/Sox10/Gabrb1/Gri…
GOBP_CILIUM_MOVEMENT	GOBP_CILIUM_MOVEMENT	GOBP_CILIUM_MOVEMENT	176	-0.521802	-2.13237	3.88013e-09	6.85101e-06	6.42195e-06	1967	tags=38%, list=12%, signal=33%	Cfap65/Tubb4b/Ttc12/Tuba1a/Ccdc65/1110017D15Rik/Spef1/Dnah7b/Rfx3/Kif9/Dnai2/Cfap100/Tekt1/Adcy3/Rsph4a/Cfap206/Pacrg/Odad4/Slc9a3r1/Dnah2/Cfap61/Cfap45/Mkks/Tac1/Mns1/Efcab1/Dnai4/Odad3/Dnah9/Cfap91/Odad1/Gapdhs/Fam183b/Meig1/Dnah1/Iqcg/Lrrc46/Ccdc40/Spag8/Cfap47/Cfap43/Gmnc/Dnah3/Cfap52/Dnah5/Pltp/Spag16/Aqp4/Tacr3/Spef2/Drc7/Cfap161/Ttc21a/Dnaaf3/Zmynd10/Lrrc23/Cfap57/Tekt2/Ccdc146/Dnah11/Dnah…
GOBP_FOREBRAIN_DEVELOPMENT	GOBP_FOREBRAIN_DEVELOPMENT	GOBP_FOREBRAIN_DEVELOPMENT	357	-0.418797	-1.84433	3.54152e-09	6.85101e-06	6.42195e-06	2647	tags=25%, list=16%, signal=22%	Nfib/Atat1/Nefl/Rara/Dlx1/Sstr1/Hes5/Zic3/Tmem108/Ogdh/Nr2f2/Chd7/Hap1/Syne2/Olig2/Mdk/Crh/Crtac1/Fgfr1/Atic/Cntn2/Otx2/Btbd3/Rpgrip1l/D16Ertd472e/Tuba1a/Alk/Epha5/Kdm6b/Ttc8/P2ry12/Itgam/Shh/Bcl11b/Slit1/Wnt2b/Fgfr2/Zeb2/Neurod1/Plxna4/Msx1/Lamb1/Slc32a1/Otp/Trp73/Slit3/Atf5/Ascl1/Filip1/Ephb2/Gria1/Tubb2a/Robo1/Prdm8/Nhlh2/Wnt7b/Slit2/Sox1/Wnt7a/Btg2/Nr4a2/Rac3/Mkks/Prox1/Fos/Mettl3/Inhba/Lpar1…
GOBP_NEUROGENESIS	GOBP_NEUROGENESIS	GOBP_NEUROGENESIS	1573	-0.292198	-1.43913	1.01748e-08	1.53988e-05	1.44344e-05	3124	tags=23%, list=19%, signal=20%	Mylip/Srf/Spag6l/Med1/Il6st/Dbn1/Map1b/Ntn1/Cyfip1/Llgl1/Myd88/Mtch1/Kcnip2/Grm5/Wnk1/Eml1/Prmt1/Rras2/Ddr2/P3h1/Npr2/Nova2/Megf8/Anapc2/Igsf10/Dvl2/Slitrk3/Efnb2/Map4k4/Uhmk1/Lhfpl5/Jag1/Oprm1/Thy1/Arhgap4/Pard3/Celsr1/Dscaml1/Dchs1/Ndnf/Samd11/Dlx2/Sema5b/Cspg5/Gorasp1/Rita1/Myo6/Plk5/Shank3/Ntng2/Erbb2/Bcl6/Lonrf2/Pfkfb3/Micall2/Kit/Nfib/Atat1/Manf/Nefl/Arhgef40/Vegfc/Cdh23/Nfia/Gigyf2/Ptprf/D…
GOCC_CILIARY_PLASM	GOCC_CILIARY_PLASM	GOCC_CILIARY_PLASM	149	-0.540414	-2.15108	1.60366e-08	1.88768e-05	1.76946e-05	1981	tags=32%, list=12%, signal=29%	Kif19a/Tubb4b/Ift172/Rpgrip1l/Tuba1a/Ccdc65/1110017D15Rik/Ccdc66/Spef1/Dnah7b/Dnai2/Cfap100/Tekt1/Rsph4a/Cfap206/Pacrg/Odad4/Dnah2/Cfap61/Cfap45/Mns1/Dnai4/Odad3/Dnah9/Cfap91/Odad1/Fam183b/Dnah1/Ccdc40/Spag8/Mapk15/Ttc30a1/Cfap43/Dnah3/Cfap52/Dnah12/Dnah5/Spag16/Rsph1/Cfap161/Tekt2/Ccdc146/Dnah11/Dnah6/Ppp1r32/Hydin/Dnali1/Cenpf
GOBP_NEURON_PROJECTION_GUIDANCE	GOBP_NEURON_PROJECTION_GUIDANCE	GOBP_NEURON_PROJECTION_GUIDANCE	217	-0.474159	-1.9929	1.52501e-08	1.88768e-05	1.76946e-05	2024	tags=28%, list=12%, signal=25%	Edn3/Palld/Etv1/Nfasc/Epha4/Ephb1/Cntn2/Otx2/Tubb3/Sema4d/Dpysl5/Epha5/Gap43/Ttc8/Shh/Ncam1/L1cam/Bcl11b/Slit1/Egr2/Plxna4/Slit3/Ephb2/Robo1/Dcc/Sema6d/Unc5c/Crppa/Wnt7b/Slit2/Tgfb2/Robo3/Rac3/Efnb3/Ndp/Ret/Ntn3/Prkcq/Epha3/Bdnf/Ptpro/Igsf9/Vax1/Sema3e/Epha7/Sema5a/Draxin/Plxna3/Epha6/Nrp2/Tubb2b/Nr4a3/Dlx5/Nrp1/Unc5b/Ntrk1/Nkx2-1/Isl1/Ngfr/Gbx1
GOBP_BEHAVIOR	GOBP_BEHAVIOR	GOBP_BEHAVIOR	588	-0.360091	-1.6572	2.01024e-08	1.93604e-05	1.81479e-05	2084	tags=18%, list=13%, signal=16%	Lgi4/Crh/Als2/Chrna5/Npy5r/Zfhx2/Jph4/Etv1/Lrrtm1/Adcy8/Epha4/Cntn2/Clstn2/Adcy5/Chrna7/Gabra5/Penk/Foxo6/Tuba1a/Adora2a/Mrap2/Alk/Grin2d/Sez6/Trem2/Rgs14/Prkcg/Th/Parp1/Hmgcr/Bbs12/Prrt1/Oprk1/Sgsh/Cx3cr1/Snca/Ccnd2/Egr2/Adcy3/Fxn/Garem2/Htr1d/Serpinf1/Ephb2/Gria1/Kcnj10/Npas4/Gpr83/Grm1/Trh/Nhlh2/Lypd1/Btg2/Nr4a2/Cnp/Acss2/Mkks/Tac1/Mmp17/Apln/Fzd9/Efnb3/Ddo/Ndp/Grpr/Hexa/Myh14/Ednrb/Pcdh17/Tan…
GOBP_GENERATION_OF_NEURONS	GOBP_GENERATION_OF_NEURONS	GOBP_GENERATION_OF_NEURONS	1350	-0.296403	-1.44544	2.008e-08	1.93604e-05	1.81479e-05	3124	tags=23%, list=19%, signal=20%	Mylip/Srf/Spag6l/Med1/Dbn1/Map1b/Ntn1/Cyfip1/Llgl1/Mtch1/Kcnip2/Wnk1/Eml1/Prmt1/Ddr2/P3h1/Npr2/Nova2/Megf8/Anapc2/Igsf10/Dvl2/Slitrk3/Efnb2/Map4k4/Uhmk1/Lhfpl5/Jag1/Thy1/Arhgap4/Pard3/Celsr1/Dscaml1/Ndnf/Samd11/Dlx2/Sema5b/Gorasp1/Myo6/Plk5/Shank3/Ntng2/Erbb2/Bcl6/Lonrf2/Micall2/Nfib/Atat1/Manf/Nefl/Arhgef40/Vegfc/Cdh23/Nfia/Gigyf2/Ptprf/Dbnl/Ywhag/Rara/Prkca/Bche/Dlx1/Hes5/Sema4g/Cx3cl1/Zic3/Tme…
GOCC_BLOOD_MICROPARTICLE	GOCC_BLOOD_MICROPARTICLE	GOCC_BLOOD_MICROPARTICLE	61	0.68017	2.25687	2.46343e-08	2.00751e-05	1.88178e-05	1452	tags=33%, list=9%, signal=30%	Slc4a1/Hba-a1/Hbb-bt/Angptl4/Hba-a2/Ighg2c/Cp/Itih2/C1s1/Cfh/F13a1/A2m/Tfrc/Slc2a1/Agt/Serping1/Kdm4d/Fn1/C4b/Itga2b
GOBP_CELL_CELL_SIGNALING	GOBP_CELL_CELL_SIGNALING	GOBP_CELL_CELL_SIGNALING	1097	-0.313876	-1.51353	2.30508e-08	2.00751e-05	1.88178e-05	3353	tags=27%, list=20%, signal=23%	Hdac6/F2r/Sorcs2/Htr1a/Kcnd2/Mpzl1/Camkv/P2rx4/Calm3/Slc4a8/Gpr176/Clmp/Fgf13/Rit2/Prkar2b/Gja1/Nefh/Htr2c/Il15/Grin2c/Apba3/Itsn1/Srf/Hcn2/Dbn1/Wls/Map1b/Cyfip1/Rps6ka1/Mbp/Cacng5/Kcnip2/Grm5/Slc16a2/Nalcn/Tnfsf10/Tyrobp/Npr2/Btk/Anapc2/Slitrk3/Grin2b/Efnb2/Oprm1/Pkp2/Ecrg4/Thy1/Igsf11/Gpr27/Hcn4/Klf10/Cdh8/Insyn2a/Stxbp4/Grap/Slc8a2/Calca/Cspg5/Htr1b/Rimbp3/Shank3/Ntng2/Pdyn/Rab3b/Irs1/Prkaca/D…
GOBP_GLIAL_CELL_DIFFERENTIATION	GOBP_GLIAL_CELL_DIFFERENTIATION	GOBP_GLIAL_CELL_DIFFERENTIATION	238	-0.450321	-1.90798	3.65806e-08	2.58357e-05	2.42177e-05	4181	tags=42%, list=25%, signal=32%	Daam2/Wdr1/Reln/Nab1/Map2k2/Bin1/Sox2/Clu/Ttc21b/Cntn1/Cntnap1/Myrf/Large1/Drd1/Dag1/Bok/Hdac1/Rnf112/Ptn/Smo/Dll1/Sox8/Ctnnb1/Hras/Sox6/Nr2e1/B4galt5/Ccdc85c/Ptprz1/Tppp/Ndrg1/Il6st/Myd88/Pard3/Dlx2/Cspg5/Erbb2/Pfkfb3/Nfib/Nfia/Dlx1/Hes5/Ldlr/Dner/Olig2/Mdk/Tnfrsf21/Prx/Lgi4/Metrn/Epha4/Cntn2/Tuba1a/Adora2a/Trem2/Plpp3/Fgf5/Gap43/Gpc1/Gpr37l1/Shh/Zeb2/Egr2/Akt2/Cd9/Phgdh/Nkx6-2/Trp73/Ascl1/Olig1…
GOBP_MICROTUBULE_BASED_MOVEMENT	GOBP_MICROTUBULE_BASED_MOVEMENT	GOBP_MICROTUBULE_BASED_MOVEMENT	385	-0.395225	-1.75697	3.60076e-08	2.58357e-05	2.42177e-05	1981	tags=21%, list=12%, signal=19%	Kif19a/Cfap65/Tubb4b/Ttc12/Ift172/Tuba1a/Klc4/Ccdc65/1110017D15Rik/Bbs12/Spef1/Dnah7b/Rfx3/Hspb11/Kif9/Dnai2/Cfap100/Kif13b/Tekt1/Dynll1/Adcy3/Rsph4a/Fuz/Kif22/Cfap206/Pacrg/Odad4/Kif26b/Slc9a3r1/Dnah2/Cfap61/Cfap45/Mkks/Tac1/Mns1/Efcab1/Dnai4/Odad3/Dnah9/Kif6/Cfap91/Odad1/Gapdhs/Fam183b/Kif18a/Meig1/Dnah1/Iqcg/Lrrc46/Ccdc40/Spag8/Cfap47/Ttc30a1/Cfap43/Gmnc/Dnah3/Cfap52/Dnah12/Dnah5/Pltp/Spag16/A…
GOMF_G_PROTEIN_COUPLED_RECEPTOR_ACTIVITY	GOMF_G_PROTEIN_COUPLED_RECEPTOR_ACTIVITY	GOMF_G_PROTEIN_COUPLED_RECEPTOR_ACTIVITY	261	-0.44918	-1.92401	5.28199e-08	3.49734e-05	3.27831e-05	1868	tags=27%, list=11%, signal=24%	S1pr1/Ramp3/Adora2a/Grm4/Gprc5b/S1pr2/Oprk1/P2ry13/Gpr45/Cx3cr1/P2ry12/Gpr37l1/Ackr3/Gpr35/Fzd10/Htr1d/Gpr3/Sphk2/Gpr12/Grm3/Gabrb1/Gpr161/Gpr83/Adra1d/Crhr2/Grm1/Rxfp3/Adgrv1/Mrgpre/S1pr5/Fzd9/Gpr153/Grpr/Gpr34/Ednrb/Adora2b/Adgrf2/Npffr1/Trhr/Sstr4/Mas1/Lpar1/Gpr101/Gpr63/Gpr17/Cxcr4/Lpar4/Gpr37/Lhcgr/Npy2r/Vipr2/Drd5/Tacr3/Hcrtr2/Galr1/Htr4/Hcrtr1/Npbwr1/Prokr2/Prlhr/Gpr149/Avpr1a/Mc3r/Adra2b/…
GOBP_POSITIVE_REGULATION_OF_BLOOD_PRESSURE	GOBP_POSITIVE_REGULATION_OF_BLOOD_PRESSURE	GOBP_POSITIVE_REGULATION_OF_BLOOD_PRESSURE	30	-0.782715	-2.35957	9.68657e-08	6.03644e-05	5.6584e-05	754	tags=33%, list=5%, signal=32%	Npff/Rarres2/Drd5/Tacr3/Cartpt/Avpr1a/Adra2b/Glp1r/Avp/Oxt
GOBP_CILIUM_OR_FLAGELLUM_DEPENDENT_CELL_MOTILITY	GOBP_CILIUM_OR_FLAGELLUM_DEPENDENT_CELL_MOTILITY	GOBP_CILIUM_OR_FLAGELLUM_DEPENDENT_CELL_MOTILITY	142	-0.521453	-2.0579	1.63839e-07	9.64284e-05	9.03893e-05	1967	tags=37%, list=12%, signal=33%	Cfap65/Tubb4b/Ttc12/Tuba1a/Ccdc65/1110017D15Rik/Dnah7b/Rfx3/Kif9/Tekt1/Adcy3/Rsph4a/Cfap206/Pacrg/Dnah2/Cfap61/Cfap45/Mkks/Tac1/Mns1/Efcab1/Odad3/Dnah9/Gapdhs/Fam183b/Meig1/Dnah1/Iqcg/Lrrc46/Ccdc40/Spag8/Cfap47/Cfap43/Dnah3/Cfap52/Dnah5/Pltp/Spag16/Tacr3/Spef2/Drc7/Cfap161/Ttc21a/Lrrc23/Cfap57/Tekt2/Ccdc146/Dnah11/Dnah6/Armc3/Ppp1r32/Dnali1/Ttll6
GOBP_NEURON_DEVELOPMENT	GOBP_NEURON_DEVELOPMENT	GOBP_NEURON_DEVELOPMENT	1054	-0.306512	-1.46996	2.05791e-07	0.000114745	0.000107559	3124	tags=23%, list=19%, signal=20%	Mylip/Srf/Spag6l/Dbn1/Map1b/Ntn1/Cyfip1/Llgl1/Mtch1/Kcnip2/Wnk1/Prmt1/Ddr2/P3h1/Npr2/Nova2/Megf8/Anapc2/Dvl2/Slitrk3/Efnb2/Map4k4/Uhmk1/Lhfpl5/Thy1/Arhgap4/Pard3/Dscaml1/Ndnf/Samd11/Sema5b/Gorasp1/Plk5/Shank3/Ntng2/Erbb2/Lonrf2/Micall2/Nfib/Atat1/Manf/Nefl/Arhgef40/Cdh23/Ptprf/Dbnl/Prkca/Hes5/Sema4g/Cx3cl1/Tmem108/Plppr4/Col25a1/Chl1/Ogdh/Ednra/Lrrc7/Actl6b/Abi3/Adnp/Bloc1s5/Nrep/Wasf1/Ptpn9/Arhg…
GOBP_MICROTUBULE_BUNDLE_FORMATION	GOBP_MICROTUBULE_BUNDLE_FORMATION	GOBP_MICROTUBULE_BUNDLE_FORMATION	112	-0.552185	-2.08355	2.39486e-07	0.000126856	0.000118911	1967	tags=37%, list=12%, signal=32%	Cfap65/Ttc12/Ccdc65/Ccdc66/Spef1/Dnah7b/Dnai2/Cfap100/Rsph4a/Cfap206/Odad4/Nckap5/Dnah2/Mns1/Efcab1/Dnai4/Odad3/Cfap91/Odad1/Meig1/Dnah1/Iqcg/Lrrc46/Ccdc40/Cfap47/Lrguk/Cfap43/Dnah5/Spag16/Spef2/Rsph1/Drc7/Dnaaf3/Zmynd10/Foxj1/Lrrc23/Cfap57/Tekt2/Ccdc146/Hydin/Ttll6
HP_HYPOCHROMIC_ANEMIA	HP_HYPOCHROMIC_ANEMIA	HP_HYPOCHROMIC_ANEMIA	45	0.710296	2.22449	2.90947e-07	0.000140104	0.00013133	1359	tags=31%, list=8%, signal=29%	Alas2/Hba-a1/Hbb-bt/Hba-a2/Fas/H2-Aa/Cp/Tmprss6/H2-Ab1/Slc12a3/Elf4/Was/Tet2/Fn1
GOBP_GLIOGENESIS	GOBP_GLIOGENESIS	GOBP_GLIOGENESIS	313	-0.412027	-1.79697	2.8175e-07	0.000140104	0.00013133	4181	tags=39%, list=25%, signal=30%	Daam2/Wdr1/Reln/Gpr183/Nab1/Map2k2/Bin1/Sox2/Chrm1/Clu/Ttc21b/Cntn1/Cntnap1/Myrf/Large1/Drd1/Dag1/Bok/Rras/Hdac1/Rnf112/Ptn/Trp53/Smo/Dll1/Sox8/Ctnnb1/Hras/Sox6/Nr2e1/B4galt5/Ccdc85c/P2rx4/Ptprz1/Tppp/Ndrg1/Il6st/Ntn1/Myd88/Rras2/Pard3/Dlx2/Cspg5/Erbb2/Pfkfb3/Nfib/Vegfc/Nfia/Dlx1/Hes5/Cx3cl1/Ldlr/Dner/Syne2/Olig2/Mdk/Tnfrsf21/Ndn/Prx/Lgi4/Metrn/Epha4/Cntn2/Penk/Tuba1a/Adora2a/Trem2/Plpp3/Fgf5/Gap…
GOBP_AXONEME_ASSEMBLY	GOBP_AXONEME_ASSEMBLY	GOBP_AXONEME_ASSEMBLY	81	-0.597868	-2.18424	3.14623e-07	0.000144918	0.000135842	1967	tags=47%, list=12%, signal=41%	Cfap65/Ttc12/Ccdc65/Spef1/Dnah7b/Dnai2/Cfap100/Rsph4a/Cfap206/Odad4/Dnah2/Mns1/Efcab1/Dnai4/Odad3/Cfap91/Odad1/Meig1/Dnah1/Iqcg/Lrrc46/Ccdc40/Cfap47/Lrguk/Cfap43/Dnah5/Spag16/Spef2/Rsph1/Drc7/Dnaaf3/Zmynd10/Foxj1/Lrrc23/Cfap57/Tekt2/Ccdc146/Hydin
GOCC_MOTILE_CILIUM	GOCC_MOTILE_CILIUM	GOCC_MOTILE_CILIUM	224	-0.451116	-1.90529	3.59698e-07	0.0001552	0.00014548	1967	tags=29%, list=12%, signal=26%	Cfap65/Tubb4b/Ift172/Crocc/Tuba1a/Cetn2/Ccdc65/1110017D15Rik/Kcnu1/Spef1/Dnah7b/Kif9/Dnai2/Cfap100/Tekt1/Rsph4a/Cfap206/Pacrg/Odad4/Slc9a3r1/Spag4/Dnah2/Cfap61/Cfap45/Mkks/Mns1/Efcab1/Dnai4/Odf3b/Odad3/Dnah9/Cfap91/Fam183b/Catsperg1/Dnah1/Iqcg/Lrrc46/Ccdc40/Spag8/Cfap47/Cfap43/Iqcd/Dnah3/Cfap52/Dnah5/Spata3/Spag16/Adgb/Tacr3/Spef2/Rsph1/Drc7/Cfap161/Tsga10/Ccdc153/Lrrc23/Cfap57/Tekt2/Ccdc146/Dnah…
GOCC_CYTOPLASMIC_REGION	GOCC_CYTOPLASMIC_REGION	GOCC_CYTOPLASMIC_REGION	261	-0.434532	-1.86127	3.66246e-07	0.0001552	0.00014548	2691	tags=26%, list=16%, signal=22%	Hpca/Prkaca/Nefl/Ccdc96/Ap3b2/Iqub/Myo5b/Tmem108/Chrna2/Hap1/Tubb4a/Cfap46/Bloc1s5/Wasf1/Kif19a/Tubb4b/Ift172/Rpgrip1l/Tuba1a/Ccdc65/1110017D15Rik/Ccdc66/Spef1/Dnah7b/Dnai2/Cfap100/Tekt1/Dynll1/Rsph4a/Cfap206/Pacrg/Odad4/Erc1/Dnah2/Cfap61/Cfap45/Mns1/Dnai4/Odad3/Dnah9/Cfap91/Odad1/Fam183b/Dnah1/Ccdc40/Arc/Spag8/Mapk15/Ttc30a1/Phldb1/Cfap43/Dnah3/Cfap52/Dnah12/Dnah5/Spag16/Rsph1/Cfap161/Insc/Tekt2…
GOBP_SYNAPTIC_SIGNALING	GOBP_SYNAPTIC_SIGNALING	GOBP_SYNAPTIC_SIGNALING	731	-0.327591	-1.54296	4.41154e-07	0.000179753	0.000168496	3583	tags=28%, list=22%, signal=23%	Pdzd11/Ctnnb1/Hras/Nr2e1/Rgs10/Arrb2/Camk2b/Gnao1/Snx14/Shank1/Adarb1/Nsmf/Grin3a/Hdac6/F2r/Sorcs2/Htr1a/Kcnd2/Camkv/P2rx4/Calm3/Slc4a8/Gpr176/Clmp/Rit2/Prkar2b/Nefh/Htr2c/Grin2c/Apba3/Srf/Dbn1/Map1b/Cyfip1/Rps6ka1/Mbp/Cacng5/Kcnip2/Grm5/Nalcn/Tyrobp/Npr2/Anapc2/Slitrk3/Grin2b/Oprm1/Igsf11/Cdh8/Insyn2a/Slc8a2/Cspg5/Htr1b/Rimbp3/Shank3/Ntng2/Pdyn/Rab3b/Prkaca/Dlg3/Kit/Pdlim4/Nefl/Stx4a/Pnoc/Chrm5/…
GOBP_OLIGODENDROCYTE_DIFFERENTIATION	GOBP_OLIGODENDROCYTE_DIFFERENTIATION	GOBP_OLIGODENDROCYTE_DIFFERENTIATION	104	-0.545664	-2.04197	4.70393e-07	0.000184568	0.000173009	3984	tags=44%, list=24%, signal=34%	Clu/Cntn1/Cntnap1/Myrf/Dag1/Bok/Hdac1/Ptn/Sox8/Ctnnb1/Sox6/B4galt5/Ptprz1/Tppp/Dlx2/Erbb2/Dlx1/Hes5/Olig2/Mdk/Tnfrsf21/Cntn2/Shh/Cd9/Nkx6-2/Trp73/Ascl1/Olig1/Sox10/Kcnj10/Prdm8/Sox1/Trpc4/Cnp/Slc45a3/Tmem98/Lpar1/Nkx2-2/Plp1/Gpr17/Cxcr4/Opalin/Fa2h/Mag/Nkx2-1/Drd3
GOBP_HEAD_DEVELOPMENT	GOBP_HEAD_DEVELOPMENT	GOBP_HEAD_DEVELOPMENT	702	-0.330135	-1.54901	5.0617e-07	0.000191513	0.000179519	1951	tags=17%, list=12%, signal=15%	Fgfr1/Atic/Nfasc/Syngr3/Ephb1/Cntn2/Ift172/Otx2/S1pr1/Btbd3/Rpgrip1l/D16Ertd472e/Tuba1a/Alk/Grin2d/Kdm7a/Sez6/Epha5/Kdm6b/Cx3cr1/Ttc8/P2ry12/Itgam/Gpr37l1/Shh/Bcl11b/Slit1/Mmp2/Wnt2b/Fgfr2/Zeb2/Neurod1/Dynll1/Egr2/Plxna4/Msx1/Lamb1/Phgdh/Slc32a1/Otp/Trp73/Sphk2/Odad4/Slit3/Atf5/Ascl1/Filip1/Abcb6/Ephb2/Gria1/Tubb2a/Robo1/Gdf10/Sema6d/Prdm8/Unc5c/Nhlh2/Wnt7b/Slit2/Cers1/Tgfb2/Sox1/Wnt7a/Btg2/Nr4a2…
GOBP_PARENTAL_BEHAVIOR	GOBP_PARENTAL_BEHAVIOR	GOBP_PARENTAL_BEHAVIOR	14	-0.888761	-2.22878	5.6941e-07	0.000194591	0.000182404	63	tags=36%, list=0%, signal=36%	Oprk1/Avpr1a/Avp/Gal/Oxt
HP_HYPOCHROMIC_MICROCYTIC_ANEMIA	HP_HYPOCHROMIC_MICROCYTIC_ANEMIA	HP_HYPOCHROMIC_MICROCYTIC_ANEMIA	18	0.853322	2.18344	5.53935e-07	0.000194591	0.000182404	163	tags=33%, list=1%, signal=33%	Alas2/Hba-a1/Hbb-bt/Hba-a2/Cp/Tmprss6
GOBP_MICROTUBULE_BASED_PROCESS	GOBP_MICROTUBULE_BASED_PROCESS	GOBP_MICROTUBULE_BASED_PROCESS	848	-0.31569	-1.4988	5.3939e-07	0.000194591	0.000182404	2495	tags=18%, list=15%, signal=16%	Tuba1b/Ap3b2/Iqub/Pde4dip/Tmem108/Enkd1/Hap1/Tuba4a/Ccdc78/Tubb4a/Tpx2/Fign/Syne2/Haus8/Cfap46/Cdk5rap2/Bloc1s5/Wasf1/Tubb5/Fkbp4/Map10/Obsl1/Ift22/Cgn/Kif19a/Togaram2/Cfap65/Tubb4b/Ttc12/Cntn2/Ift172/Spice1/Nubp1/Crocc/Tubb3/Tuba1a/Cetn2/Klc4/Tuba1c/Ccdc65/Rgs14/1110017D15Rik/Ccdc66/Inpp5j/Mid1ip1/Bbs12/Spef1/Fignl1/Dnah7b/Rfx3/Hspb11/Kif9/Dnai2/Cep72/Katna1/Snca/Cfap100/Kif13b/Tekt1/D7Ertd443e/…
GOBP_NERVOUS_SYSTEM_PROCESS	GOBP_NERVOUS_SYSTEM_PROCESS	GOBP_NERVOUS_SYSTEM_PROCESS	844	-0.311466	-1.47796	6.8569e-07	0.000227006	0.00021279	2790	tags=23%, list=17%, signal=20%	Grap/Efemp1/Slc8a2/Calca/Sema5b/Chst10/Specc1/Myo6/Shank3/Pdyn/Zfp513/Atpsckmt/Lonrf2/Kit/Musk/Manf/Nefl/Stx4a/Pnoc/Cdh23/Chrm5/Gpr155/Gigyf2/Kifc3/Tmem150c/Prkca/Pkd2l1/Ddit3/Bche/Jam2/Lxn/Tmem108/Chl1/Ednra/Ldlr/Chrna2/Tcf15/Chd7/Cacng4/Chrna1/Ccdc78/Cln8/Gaa/Gnas/Adnp/Gnal/Piezo2/Mdk/Gmfb/Tnfrsf21/Ndn/Crh/Rgs9/Chrna5/Zfhx2/Gjc3/Jph4/Fgfr1/Timm10/Adcy8/Ephb1/Cntn2/Aoc2/Clstn2/S1pr1/Adcy5/Chrna7…
HP_SUPERNUMERARY_SPLEENS	HP_SUPERNUMERARY_SPLEENS	HP_SUPERNUMERARY_SPLEENS	85	-0.581437	-2.14093	7.41001e-07	0.000237884	0.000222986	1914	tags=33%, list=12%, signal=29%	Ttc12/Rpgrip1l/Hyls1/Dnai2/Rsph4a/Ltbp4/Odad4/Tmem231/Gpc4/Cfap45/Efcab1/Odad3/Dnah9/Odad1/Fgfrl1/Dnah1/Mycn/Ccdc40/Dnah5/Spef2/Rsph1/Dnaaf3/Zmynd10/Tmem107/Foxj1/Dnah11/Hydin/Cenpf
GOBP_BIOLOGICAL_PROCESS_INVOLVED_IN_INTRASPECIES_INTERACTION_BETWEEN_ORGANISMS	GOBP_BIOLOGICAL_PROCESS_INVOLVED_IN_INTRASPECIES_INTERACTION_BETWEEN_ORGANISMS	GOBP_BIOLOGICAL_PROCESS_INVOLVED_IN_INTRASPECIES_INTERACTION_BETWEEN_ORGANISMS	54	-0.653051	-2.2511	8.61032e-07	0.000263495	0.000246993	1742	tags=22%, list=11%, signal=20%	Trem2/Cx3cr1/Garem2/Npas4/Mkks/Grpr/Grp/Gng8/Avpr1a/Avp/Oxt/Drd3
HP_ABNORMAL_SPERM_PHYSIOLOGY	HP_ABNORMAL_SPERM_PHYSIOLOGY	HP_ABNORMAL_SPERM_PHYSIOLOGY	91	-0.56297	-2.10032	8.70523e-07	0.000263495	0.000246993	1967	tags=37%, list=12%, signal=33%	Cfap65/Ttc12/Pde11a/Kcnu1/Dnah7b/Dnai2/Rsph4a/Odad4/Dnah2/Cfap61/Cfap45/Odad3/Dnah9/Cfap91/Odad1/Dnah1/Ccdc40/Cfap47/Cfap43/Dnah5/Spef2/Rsph1/Stk33/Ttc21a/Dnaaf3/Zmynd10/Foxj1/Lrrc23/Strc/Ccdc146/Dnah11/Hydin/Dnali1/Ak7
GOBP_FOREBRAIN_GENERATION_OF_NEURONS	GOBP_FOREBRAIN_GENERATION_OF_NEURONS	GOBP_FOREBRAIN_GENERATION_OF_NEURONS	79	-0.585539	-2.12905	9.40592e-07	0.000276795	0.00025946	1951	tags=33%, list=12%, signal=29%	Fgfr1/Cntn2/D16Ertd472e/Bcl11b/Slit1/Fgfr2/Otp/Slit3/Atf5/Ascl1/Robo1/Nhlh2/Slit2/Sox1/Rac3/Prox1/Mettl3/Inhba/Sema3e/Plxna3/Nrp2/Dlx5/Nrp1/Nkx2-1/Eomes/Lhx8
GOBP_AMINE_TRANSPORT	GOBP_AMINE_TRANSPORT	GOBP_AMINE_TRANSPORT	72	-0.607856	-2.19332	1.03215e-06	0.000295529	0.000277021	566	tags=15%, list=3%, signal=15%	Sncg/Slc18a2/Slc17a8/Npy2r/Cartpt/Avpr1a/Adra2b/Slc18a3/Avp/Oxt/Drd3
GOBP_CENTRAL_NERVOUS_SYSTEM_NEURON_DIFFERENTIATION	GOBP_CENTRAL_NERVOUS_SYSTEM_NEURON_DIFFERENTIATION	GOBP_CENTRAL_NERVOUS_SYSTEM_NEURON_DIFFERENTIATION	201	-0.45009	-1.86923	1.08102e-06	0.000301376	0.000282502	2798	tags=30%, list=17%, signal=25%	Ndnf/Dlx2/Shank3/Bcl6/Lonrf2/Nfib/Gigyf2/Prkca/Dlx1/Hes5/Ogdh/Cln8/Olig2/Epha4/Ephb1/Cntn2/Ift172/D16Ertd472e/Tuba1a/Shh/Bcl11b/Slit1/Cdh11/Fgfr2/Zeb2/Neurod1/Plxna4/Otp/Slit3/Atf5/Ascl1/Ephb2/Gabrb1/Robo1/Dcc/Prdm8/Nhlh2/Slit2/Sox1/Wnt7a/Btg2/Nr4a2/Rac3/Zhx2/Prox1/Inhba/Nkx2-2/Sema3e/Gdf11/Draxin/Plxna3/Nrp2/Dlx5/Mdga1/Wnt2/Nrp1/Nkx2-1/Isl1/Gbx1/Eomes/Lhx8
GOBP_NEUROPEPTIDE_SIGNALING_PATHWAY	GOBP_NEUROPEPTIDE_SIGNALING_PATHWAY	GOBP_NEUROPEPTIDE_SIGNALING_PATHWAY	72	-0.604106	-2.17979	1.56354e-06	0.000424721	0.000398122	1071	tags=31%, list=7%, signal=29%	Gpr83/Rxfp3/Tac1/Grpr/Npff/Npffr1/Grp/Sstr4/Gpr37/Npy2r/Hcrtr2/Galr1/Hcrtr1/Npbwr1/Nts/Prokr2/Prlhr/Cartpt/Gpr149/Ecel1/Prok2/Gal
GOBP_AXON_DEVELOPMENT	GOBP_AXON_DEVELOPMENT	GOBP_AXON_DEVELOPMENT	475	-0.358059	-1.62075	1.70777e-06	0.000452302	0.000423976	3234	tags=27%, list=20%, signal=22%	Rgma/Fgf13/Ptprz1/Nefh/Srf/Map1b/Ntn1/Cyfip1/Llgl1/Npr2/Nova2/Megf8/Anapc2/Slitrk3/Efnb2/Thy1/Arhgap4/Pard3/Dscaml1/Sema5b/Ntng2/Erbb2/Nfib/Nefl/Arhgef40/Ptprf/Prkca/Sema4g/Plppr4/Col25a1/Chl1/Ednra/Adnp/Nrep/Arhgef25/Olig2/Bhlhe22/Tnfrsf21/Ndn/Edn3/Crtac1/Palld/Etv1/Nfasc/Metrn/Epha4/Ephb1/Cntn2/Otx2/Tubb3/Sema4d/Dpysl5/Epha5/Ngf/Gap43/Ttc8/Shh/Ncam1/L1cam/Bcl11b/Kif13b/Slit1/Mmp2/Cdh11/Fgfr2/Ze…
GOMF_TRANSMEMBRANE_SIGNALING_RECEPTOR_ACTIVITY	GOMF_TRANSMEMBRANE_SIGNALING_RECEPTOR_ACTIVITY	GOMF_TRANSMEMBRANE_SIGNALING_RECEPTOR_ACTIVITY	579	-0.337984	-1.55454	1.78426e-06	0.000461036	0.000432163	2042	tags=24%, list=12%, signal=21%	Chrna5/Npy5r/Tmem35a/Il3ra/Pth2r/Fgfr1/Acvr1/Lynx1/Epha4/Ephb1/S1pr1/Chrna7/Ramp3/Gabra5/Adora2a/Grm4/Sorl1/Csf2ra/Alk/Grin2d/Trem2/Sema4d/Gprc5b/Epha5/Ngf/S1pr2/Oprk1/Grik4/P2ry13/Gpr45/Cx3cr1/P2ry12/Gpr37l1/Ackr3/L1cam/Gpr35/Fgfr2/Plxna4/Fzd10/Ltbp4/Ifngr2/Htr1d/Gpr3/Tmem63a/Kremen2/Sphk2/Gpr12/Lag3/Ephb2/Evi2a/Grm3/Gfra1/Gabrb1/Gria1/Gpr161/Tie1/Robo1/Dcc/Il27ra/Gpr83/Adra1d/Crhr2/Ddr1/Grm1/Un…
GOCC_NEURON_PROJECTION	GOCC_NEURON_PROJECTION	GOCC_NEURON_PROJECTION	1196	-0.285542	-1.38454	2.58193e-06	0.000651262	0.000610475	3655	tags=25%, list=22%, signal=21%	Map3k12/Smo/Uchl1/Stmn2/Kif3a/Stmn3/Slc8a1/Aqp1/Elk1/Mt3/Ttc26/Tmem185a/Nrcam/Grip1/Atp2b3/Samd4/Camk2b/Abhd17c/Sh3kbp1/Scgn/Hnrnpab/Tenm1/Gldn/Gnao1/Snx14/Shank1/Nsmf/Lrrc4b/Rangap1/Grin3a/Clasp2/Hdac6/Sorcs2/Htr1a/Kcnd2/Mak/Syndig1/Synpr/Calm3/Slc4a8/Cpt1c/Crmp1/Kcna3/Bcar1/Fgf13/Rit2/Prkar2b/Cbarp/Sstr2/Nefh/Htr2c/Apba3/Itsn1/Hcn2/Il6st/Dbn1/Map1b/Eps8/Cyfip1/Llgl1/Palmd/Mbp/Adam11/Kcnip2/Grm5…
GOMF_PEPTIDE_RECEPTOR_ACTIVITY	GOMF_PEPTIDE_RECEPTOR_ACTIVITY	GOMF_PEPTIDE_RECEPTOR_ACTIVITY	84	-0.565331	-2.08773	2.95565e-06	0.00072819	0.000682585	1071	tags=35%, list=7%, signal=32%	S1pr2/Oprk1/Cx3cr1/Gpr37l1/Gpr83/Crhr2/Rxfp3/Grpr/Ednrb/Npffr1/Sstr4/Mas1/Gpr37/Lhcgr/Npy2r/Vipr2/Tacr3/Hcrtr2/Galr1/Hcrtr1/Npbwr1/Prokr2/Prlhr/Avpr1a/Mc3r/Glp1r/Calcr/Cckar/Gal
GOBP_NEGATIVE_REGULATION_OF_SMALL_MOLECULE_METABOLIC_PROCESS	GOBP_NEGATIVE_REGULATION_OF_SMALL_MOLECULE_METABOLIC_PROCESS	GOBP_NEGATIVE_REGULATION_OF_SMALL_MOLECULE_METABOLIC_PROCESS	89	0.565184	1.99297	3.14278e-06	0.00073988	0.000693543	1789	tags=21%, list=11%, signal=19%	Slc4a1/Ch25h/Angptl4/Tcf7l2/Ier3/Fmo2/Dkkl1/Akr1c18/Bmp5/Pfkfb1/Snai1/Cry1/Acacb/Lepr/Mfsd2a/Aldob/Cda/Wnt4/Ddit4
GOBP_CILIUM_ORGANIZATION	GOBP_CILIUM_ORGANIZATION	GOBP_CILIUM_ORGANIZATION	407	-0.362349	-1.61564	3.12234e-06	0.00073988	0.000693543	2056	tags=19%, list=13%, signal=17%	Ift22/Nek1/Kif19a/Cfap65/Ttc12/Ift172/Crocc/Tbc1d19/Rpgrip1l/Rabep2/Hyls1/Ccdc65/Ccdc66/Onecut2/Bbs12/Spef1/Dnah7b/Rfx3/Ttc8/Hspb11/Ehd1/Dnai2/Cfap100/Ndufaf2/Tekt1/Dynll1/Rsph4a/Gbf1/Micall1/Fuz/Cfap206/Odad4/Tmem231/Kcnj10/Slc9a3r1/Cep41/Dnah2/Cfap61/Rfx2/Mkks/Mns1/Efcab1/Alpk1/Dnai4/Odad3/Cfap91/Fhdc1/Odad1/Lpar1/Meig1/Dnah1/Iqcg/Lrrc46/Ccdc40/Cfap47/Mapk15/Ttc30a1/Lrguk/Cfap43/Gmnc/Ubxn10/Dna…
HP_ANEMIA_OF_INADEQUATE_PRODUCTION	HP_ANEMIA_OF_INADEQUATE_PRODUCTION	HP_ANEMIA_OF_INADEQUATE_PRODUCTION	171	0.477545	1.83352	3.57737e-06	0.000823884	0.000772287	2089	tags=19%, list=13%, signal=17%	Slc4a1/Alas2/Hba-a1/Hbb-bt/Hba-a2/Fas/H2-Aa/Cp/Tmprss6/H2-Ab1/Slc12a3/Rps27/Palb2/Elf4/Aldoa/Kif23/Fancm/Lars2/Cubn/Was/Tet2/Amn/Brca2/Rac2/Fn1/Fanca/Tinf2/Fancb/Dnajc21/Srd5a3/Rps14/Racgap1
GOBP_FEEDING_BEHAVIOR	GOBP_FEEDING_BEHAVIOR	GOBP_FEEDING_BEHAVIOR	70	-0.588871	-2.11226	4.12007e-06	0.000928681	0.00087052	2035	tags=31%, list=12%, signal=28%	Npy5r/Cntn2/Adora2a/Mrap2/Th/Bbs12/Oprk1/Gpr83/Trh/Mmp17/Apln/Fos/Npy2r/Nr4a3/Tacr3/Hcrtr2/Hcrtr1/Prlhr/Cartpt/Mc3r/Gal/Oxt
GOCC_9PLUS2_MOTILE_CILIUM	GOCC_9PLUS2_MOTILE_CILIUM	GOCC_9PLUS2_MOTILE_CILIUM	161	-0.465676	-1.87832	4.27051e-06	0.000942538	0.000883509	1967	tags=32%, list=12%, signal=28%	Cfap65/Tubb4b/Ift172/Crocc/Tuba1a/Cetn2/1110017D15Rik/Kcnu1/Spef1/Dnah7b/Kif9/Dnai2/Tekt1/Rsph4a/Pacrg/Odad4/Slc9a3r1/Dnah2/Cfap61/Cfap45/Mns1/Efcab1/Odad3/Dnah9/Fam183b/Catsperg1/Dnah1/Iqcg/Lrrc46/Spag8/Cfap43/Dnah3/Cfap52/Dnah5/Spata3/Spag16/Adgb/Tacr3/Spef2/Rsph1/Cfap161/Tsga10/Lrrc23/Cfap57/Tekt2/Ccdc146/Dnah11/Dnah6/Ppp1r32/Hydin/Dnali1
HP_IRON_DEFICIENCY_ANEMIA	HP_IRON_DEFICIENCY_ANEMIA	HP_IRON_DEFICIENCY_ANEMIA	24	0.780879	2.15059	5.20797e-06	0.00112598	0.00105547	1359	tags=42%, list=8%, signal=38%	Alas2/Hbb-bt/Fas/H2-Aa/Tmprss6/H2-Ab1/Slc12a3/Elf4/Was/Fn1
HP_ABNORMAL_ANATOMIC_LOCATION_OF_THE_HEART	HP_ABNORMAL_ANATOMIC_LOCATION_OF_THE_HEART	HP_ABNORMAL_ANATOMIC_LOCATION_OF_THE_HEART	132	-0.488257	-1.91228	5.45362e-06	0.00115551	0.00108315	1914	tags=26%, list=12%, signal=23%	Ttc12/Otx2/Rpgrip1l/Hyls1/Ccdc65/Ttc8/Creld1/Dnai2/Rsph4a/Msx1/Odad4/Tmem231/Robo1/Cep41/Pacs2/Cfap45/Mns1/Efcab1/Odad3/Dnah9/Odad1/Dnah1/Ccdc40/Hes7/Cfap52/Dnah5/Spef2/Rsph1/Dnaaf3/Zmynd10/Tmem107/Foxj1/Dnah11/Hydin
GOCC_EXTERNAL_SIDE_OF_PLASMA_MEMBRANE	GOCC_EXTERNAL_SIDE_OF_PLASMA_MEMBRANE	GOCC_EXTERNAL_SIDE_OF_PLASMA_MEMBRANE	209	0.444976	1.75013	5.6607e-06	0.00117587	0.00110223	1981	tags=29%, list=12%, signal=26%	Itgad/Ackr2/Icam1/Cd4/Fas/Ada/Glra1/Cd74/Cd163/Osmr/H2-Q1/Il7r/Gp1ba/Slamf9/Slc2a4/Fcer2a/Cd14/Il4ra/Il12rb1/Asgr1/Cd34/Itgal/Il6ra/Fcgr2b/H2-Eb1/Tfrc/Pecam1/Robo4/Tnfrsf18/Tnfrsf14/Lepr/Clec14a/H2-T23/Ly75/Cubn/Ace/Abcb1a/Tlr4/Adam21/Tfr2/Abcc4/St14/Ermap/Il1r1/Thbs1/H2-D1/Tgfbr2/F3/Itga2b/Rtbdn/Abca1/Gfra2/Efna5/Tgfbr3/Itga1/Epor/Itgav/Icosl/Ctsk/Itgb3
GOMF_NEUROPEPTIDE_RECEPTOR_ACTIVITY	GOMF_NEUROPEPTIDE_RECEPTOR_ACTIVITY	GOMF_NEUROPEPTIDE_RECEPTOR_ACTIVITY	33	-0.719717	-2.21957	6.2216e-06	0.00124492	0.00116695	1071	tags=39%, list=7%, signal=37%	Gpr83/Grpr/Npffr1/Sstr4/Gpr37/Npy2r/Tacr3/Hcrtr2/Galr1/Npbwr1/Prokr2/Prlhr/Gal
GOBP_REPRODUCTIVE_BEHAVIOR	GOBP_REPRODUCTIVE_BEHAVIOR	GOBP_REPRODUCTIVE_BEHAVIOR	38	-0.69043	-2.20545	6.22812e-06	0.00124492	0.00116695	984	tags=29%, list=6%, signal=27%	Th/Oprk1/Nhlh2/Tac1/Ddo/Ednrb/Drd5/Avpr1a/Avp/Gal/Oxt
HP_ABNORMAL_SPERM_TAIL_MORPHOLOGY	HP_ABNORMAL_SPERM_TAIL_MORPHOLOGY	HP_ABNORMAL_SPERM_TAIL_MORPHOLOGY	37	-0.690765	-2.20147	6.60012e-06	0.00129485	0.00121375	929	tags=46%, list=6%, signal=43%	Cfap65/Kcnu1/Dnah7b/Dnah2/Cfap61/Cfap91/Dnah1/Cfap47/Cfap43/Spef2/Stk33/Ttc21a/Lrrc23/Strc/Ccdc146/Dnali1/Ak7
GOBP_RHYTHMIC_PROCESS	GOBP_RHYTHMIC_PROCESS	GOBP_RHYTHMIC_PROCESS	258	-0.404315	-1.7317	7.28302e-06	0.00140284	0.00131499	2295	tags=21%, list=14%, signal=19%	Enox1/Adnp/Mybbp1a/Top1/Mdk/Kdm5c/Crh/Atf4/Npy5r/Phlpp1/Adamts1/Car12/Adora2a/Prkcg/Parp1/Sik1/Ngf/Oprk1/Nr1h3/Mmp2/Spsb4/Serpinf1/Esr1/Slit3/Atf5/Dbp/Enox2/Gabrb1/Gdf10/Nhlh2/Slit2/Tgfb2/Hebp1/Prox1/Nfya/Mettl3/Inhba/Gnrh1/Hes7/Magel2/Lhcgr/Npy2r/Hcrtr2/Gdf9/Prokr2/Rpe65/Top2a/Cartpt/Gpr149/Mc3r/Prok2/Ntrk1/Nkx2-1/Ngfr/Drd3
GOBP_SYNAPSE_ORGANIZATION	GOBP_SYNAPSE_ORGANIZATION	GOBP_SYNAPSE_ORGANIZATION	544	-0.331723	-1.52981	8.50675e-06	0.00160929	0.00150851	4244	tags=34%, list=26%, signal=26%	Sptb/Cdh10/Plxnc1/Zdhhc2/Cbln1/Sptbn2/Reln/Pdlim5/Ptprs/Plxna1/Sybu/Nedd8/Lhfpl4/Cttn/Ppfia4/Pls3/Slc7a11/Cntnap1/Tln2/Large1/Drd1/Dag1/Dixdc1/Clstn3/Vldlr/Tnr/Amot/Col4a5/Amigo1/Prmt8/Il1rap/Insyn1/Plxnb1/Rhog/Pdzd11/Ctnnb1/Nrcam/Camk2b/Abhd17c/Shank1/Lrrc4b/Eif4g1/Clasp2/Hdac6/F2r/Trim47/Lrrn3/Camkv/Syndig1/Crmp1/Carmil3/Fgf13/Csmd2/Nefh/Itsn1/Dbn1/Map1b/Ntn1/Cyfip1/Grm5/Ago2/Actn2/Anapc2/Slitr…
GOBP_CENTRAL_NERVOUS_SYSTEM_NEURON_DEVELOPMENT	GOBP_CENTRAL_NERVOUS_SYSTEM_NEURON_DEVELOPMENT	GOBP_CENTRAL_NERVOUS_SYSTEM_NEURON_DEVELOPMENT	92	-0.530973	-1.98064	9.26761e-06	0.00172247	0.0016146	1918	tags=30%, list=12%, signal=27%	Epha4/Ephb1/Cntn2/Slit1/Cdh11/Fgfr2/Zeb2/Plxna4/Slit3/Atf5/Ascl1/Ephb2/Gabrb1/Robo1/Dcc/Prdm8/Nhlh2/Slit2/Sox1/Btg2/Nr4a2/Rac3/Sema3e/Draxin/Plxna3/Nrp2/Nrp1/Lhx8
GOBP_REGULATION_OF_GLIAL_CELL_DIFFERENTIATION	GOBP_REGULATION_OF_GLIAL_CELL_DIFFERENTIATION	GOBP_REGULATION_OF_GLIAL_CELL_DIFFERENTIATION	66	-0.594025	-2.10826	9.85052e-06	0.00179925	0.00168657	4181	tags=55%, list=25%, signal=41%	Daam2/Wdr1/Bin1/Myrf/Dag1/Hdac1/Rnf112/Ptn/Ctnnb1/Nr2e1/Ptprz1/Il6st/Dlx2/Dlx1/Hes5/Ldlr/Olig2/Mdk/Tnfrsf21/Epha4/Cntn2/Trem2/Gpr37l1/Shh/Egr2/Nkx6-2/Trp73/Sox1/Slc45a3/Tmem98/Mycn/Nkx2-2/Cxcr4/Opalin/Mag/Drd3
GOBP_LOCOMOTORY_BEHAVIOR	GOBP_LOCOMOTORY_BEHAVIOR	GOBP_LOCOMOTORY_BEHAVIOR	188	-0.435313	-1.78556	1.0153e-05	0.00182307	0.00170889	2574	tags=26%, list=16%, signal=22%	Cdh23/Gigyf2/Chl1/Chd7/Cln8/Gng7/Gaa/Gmfb/Lgi4/Crh/Als2/Lrrtm1/Adcy8/Epha4/Cntn2/Adcy5/Penk/Tuba1a/Adora2a/Alk/Grin2d/Sez6/Th/Oprk1/Snca/Ccnd2/Fxn/Gria1/Kcnj10/Grm1/Trh/Nr4a2/Cnp/Efnb3/Hexa/Sncg/Slc18a2/Gprin3/C1ql1/Slitrk6/Gpr37/Npy2r/Zic1/Mc3r/Avp/Nkx2-1/Gbx1/Drd3
HP_MICROCYTIC_ANEMIA	HP_MICROCYTIC_ANEMIA	HP_MICROCYTIC_ANEMIA	41	0.674386	2.04086	1.17796e-05	0.00207988	0.00194963	163	tags=15%, list=1%, signal=15%	Alas2/Hba-a1/Hbb-bt/Hba-a2/Cp/Tmprss6
GOBP_REGULATION_OF_NERVOUS_SYSTEM_DEVELOPMENT	GOBP_REGULATION_OF_NERVOUS_SYSTEM_DEVELOPMENT	GOBP_REGULATION_OF_NERVOUS_SYSTEM_DEVELOPMENT	411	-0.356854	-1.59531	1.28444e-05	0.00223072	0.00209102	3851	tags=34%, list=23%, signal=26%	Dag1/D130043K22Rik/Clstn3/Chodl/Tnr/Hdac1/Sema6c/Amigo1/Rnf112/Fbxw8/Ptn/Trp53/Il1rap/Smo/Dll1/Sox8/Plxnb1/Dll3/Ctnnb1/Mt3/Nr2e1/Camk2b/Lig4/Lrrc4b/Hey1/Hdac6/Lrrn3/Syndig1/Dll4/Rgma/Fgf13/Ptprz1/Tppp/Srf/Il6st/Dbn1/Map1b/Ntn1/Grm5/Megf8/Anapc2/Slitrk3/Oprm1/Thy1/Arhgap4/Pard3/Dlx2/Gorasp1/Shank3/Kit/Nefl/Vegfc/Rara/Prkca/Dlx1/Hes5/Jam2/Cx3cl1/Hltf/Ldlr/Chd7/Hap1/Adnp/Olig2/Mdk/Obsl1/Tnfrsf21/Lgi…
GOBP_CELL_PROJECTION_ASSEMBLY	GOBP_CELL_PROJECTION_ASSEMBLY	GOBP_CELL_PROJECTION_ASSEMBLY	582	-0.323066	-1.48634	1.37297e-05	0.002346	0.00219908	1967	tags=18%, list=12%, signal=16%	Cfap65/Fgfr1/Ttc12/Ift172/Dpysl3/S1pr1/Crocc/Tbc1d19/Rpgrip1l/Mtss1/Rabep2/Eps8l2/Hyls1/Ccdc65/Ccdc66/Onecut2/S1pr2/Gap43/Pfn1/Spef1/Dnah7b/Rfx3/Arhgef26/Ttc8/Hspb11/P2ry12/Ehd1/Dnai2/Cfap100/Ndufaf2/Tekt1/Dynll1/Rsph4a/Gbf1/Micall1/Fuz/Cspg4/Cfap206/Mtss2/Odad4/Tmem231/Ephb2/Kcnj10/Aif1/Slc9a3r1/Cep41/Slit2/Dnah2/Cfap61/Rfx2/Dock11/Rac3/Mkks/Mns1/Plxnb3/Efcab1/Alpk1/Dnai4/Cdc42ep2/Clrn1/Odad3/Cf…
GOCC_SOMATODENDRITIC_COMPARTMENT	GOCC_SOMATODENDRITIC_COMPARTMENT	GOCC_SOMATODENDRITIC_COMPARTMENT	781	-0.302743	-1.43367	1.58387e-05	0.00266341	0.00249661	4499	tags=33%, list=27%, signal=25%	Mink1/Agfg1/Septin4/Srr/Gabbr1/Wfs1/Mapk8ip1/Sgce/Kcnk1/Tacr1/Prex1/Psen1/Syt11/Sez6l/Casr/Map2k1/Sst/Tenm2/Inpp5f/Rap1gap/Slc22a3/Ddn/Casc3/Ptchd1/Sptbn2/Nrsn2/Rtn4rl2/Napepld/Adcy4/Reln/Chrm4/Luzp1/Homer2/Ptprs/Bin1/Slc38a7/Cacna1c/Chrm1/Lhfpl4/Cttn/Glrx3/Grm7/Clu/Prr7/Lgi1/Rogdi/Kcnc1/Trpm2/Drd1/Clstn3/Hdac1/Amigo1/Rnf112/Smo/Uchl1/Stmn2/P2rx7/Slc8a1/Elk1/Mt3/Tmem185a/Grip1/Samd4/Abhd17c/Scgn/…
GOBP_CELL_MORPHOGENESIS_INVOLVED_IN_NEURON_DIFFERENTIATION	GOBP_CELL_MORPHOGENESIS_INVOLVED_IN_NEURON_DIFFERENTIATION	GOBP_CELL_MORPHOGENESIS_INVOLVED_IN_NEURON_DIFFERENTIATION	548	-0.328159	-1.51135	2.20297e-05	0.0036466	0.00341822	3122	tags=24%, list=19%, signal=20%	Srf/Dbn1/Map1b/Ntn1/Cyfip1/Llgl1/Npr2/Nova2/Megf8/Anapc2/Slitrk3/Efnb2/Lhfpl5/Thy1/Arhgap4/Pard3/Dscaml1/Sema5b/Gorasp1/Shank3/Ntng2/Erbb2/Nfib/Nefl/Arhgef40/Cdh23/Prkca/Sema4g/Plppr4/Col25a1/Chl1/Ednra/Abi3/Adnp/Arhgef25/Obsl1/Ndn/Edn3/Palld/Etv1/Nfasc/Metrn/Epha4/Ephb1/Cntn2/Otx2/Chrna7/Tubb3/Btbd3/Sema4d/Dpysl5/Epha5/Caprin1/Ngf/Gap43/Ttc8/Shh/Ncam1/L1cam/Ppfia2/Bcl11b/Kif13b/Slit1/Arhgap33/Cd…
GOBP_DETECTION_OF_TEMPERATURE_STIMULUS	GOBP_DETECTION_OF_TEMPERATURE_STIMULUS	GOBP_DETECTION_OF_TEMPERATURE_STIMULUS	20	-0.767373	-2.07713	2.43155e-05	0.00391331	0.00366823	900	tags=25%, list=5%, signal=24%	Ano1/Tac1/Ntrk1/Ngfr/Prdm12
GOBP_CELL_PROJECTION_MORPHOGENESIS	GOBP_CELL_PROJECTION_MORPHOGENESIS	GOBP_CELL_PROJECTION_MORPHOGENESIS	625	-0.316887	-1.46961	2.43797e-05	0.00391331	0.00366823	3122	tags=24%, list=19%, signal=20%	Srf/Spag6l/Enpp2/Dbn1/Map1b/Ntn1/Cyfip1/Llgl1/Npr2/Nova2/Megf8/Anapc2/Dvl2/Slitrk3/Efnb2/Map4k4/Thy1/Arhgap4/Pard3/Dscaml1/Sema5b/Cspg5/Gorasp1/Shank3/Ntng2/Erbb2/Nfib/Nefl/Arpin/Arhgef40/Pdpn/Dbnl/Prkca/Sema4g/Tmem108/Plppr4/Col25a1/Chl1/Ednra/Abi3/Adnp/Wasf1/Arhgef25/Mdk/Syt17/Obsl1/Ndn/Als2/Edn3/Palld/Etv1/Nfasc/Metrn/Epha4/Ephb1/Cntn2/Otx2/Chrna7/Tubb3/Btbd3/Tuba1a/Adora2a/Sema4d/Dpysl5/Epha5…
GOBP_LIMBIC_SYSTEM_DEVELOPMENT	GOBP_LIMBIC_SYSTEM_DEVELOPMENT	GOBP_LIMBIC_SYSTEM_DEVELOPMENT	112	-0.497294	-1.87643	2.48898e-05	0.00393556	0.00368909	4145	tags=45%, list=25%, signal=34%	Reln/Ptprs/Plxna1/Dclk2/Large1/Drd1/Bbs1/Hdac1/Smo/Ctnnb1/Nr2e1/Bax/Fgf13/Srf/Ndnf/Dlx2/Atat1/Nefl/Rara/Dlx1/Zic3/Tmem108/Ogdh/Hap1/Mdk/Crh/Fgfr1/Tuba1a/Alk/Epha5/Kdm6b/Fgfr2/Zeb2/Neurod1/Slc32a1/Otp/Trp73/Nhlh2/Btg2/Mkks/Prox1/Sox3/Sema3e/Neurod6/Plxna3/Nrp2/Nr4a3/Nrp1/Zic1/Nkx2-1
GOCC_DENDRITIC_TREE	GOCC_DENDRITIC_TREE	GOCC_DENDRITIC_TREE	592	-0.316113	-1.45289	2.56233e-05	0.00399196	0.00374196	3604	tags=26%, list=22%, signal=21%	Slc8a1/Elk1/Mt3/Tmem185a/Grip1/Samd4/Abhd17c/Scgn/Hnrnpab/Gnao1/Snx14/Shank1/Nsmf/Rangap1/Hdac6/Sorcs2/Htr1a/Kcnd2/Syndig1/Slc4a8/Cpt1c/Crmp1/Fgf13/Rit2/Prkar2b/Htr2c/Apba3/Itsn1/Hcn2/Il6st/Dbn1/Map1b/Palmd/Kcnip2/Grm5/Ago2/Actn2/Grin2b/Efnb2/Uhmk1/Oprm1/Thy1/Hcn4/Rgs12/Slc8a2/Htr1b/Shank3/Pdyn/Hpca/Pdlim4/Stx4a/Pnoc/Chrm5/Gigyf2/Dbnl/Rara/Stat1/Tmem108/Htr7/Chl1/Hap1/Dner/Abi3/Adnp/Wasf1/Acad9/A…
HP_ABSENT_SPERM_FLAGELLA	HP_ABSENT_SPERM_FLAGELLA	HP_ABSENT_SPERM_FLAGELLA	25	-0.749711	-2.1319	3.03644e-05	0.00466203	0.00437006	929	tags=48%, list=6%, signal=45%	Dnah2/Cfap61/Cfap91/Dnah1/Cfap47/Cfap43/Spef2/Stk33/Ttc21a/Lrrc23/Ccdc146/Ak7
GOBP_INFLAMMATORY_RESPONSE	GOBP_INFLAMMATORY_RESPONSE	GOBP_INFLAMMATORY_RESPONSE	604	0.344372	1.48825	3.29184e-05	0.00498196	0.00466995	2124	tags=19%, list=13%, signal=18%	Lcn2/Bst1/Hba-a1/Ccl17/Hbb-bt/Ackr2/Alox5/Hba-a2/Pla2g3/Ier3/Apod/Ighg2c/Cd6/Socs3/Nlrp6/Ada/Adm/Cd163/Osmr/Tlr7/Birc3/Tlr2/Cd14/Txnip/Il4ra/Cybb/Siglec1/Casp12/Ptgis/C5ar1/Elf4/Cysltr1/Itgal/Timp1/Lyz2/Foxf1/Il6ra/Pparg/C5ar2/Camk2n1/Pglyrp1/Fcgr2b/H2-Eb1/Tfrc/Naip2/Havcr2/Anxa1/Fam76b/Ido1/Col6a1/Map3k8/Ccn4/Tlr9/Hgf/Mapk13/Ace2/Rhbdf2/Agt/H2-T23/Ly75/Ptafr/Sphk1/Slc11a1/Ackr1/Ccl25/Cyp26b1/Tlr…
GOBP_GROOMING_BEHAVIOR	GOBP_GROOMING_BEHAVIOR	GOBP_GROOMING_BEHAVIOR	14	-0.831496	-2.08517	3.69251e-05	0.00550964	0.00516458	807	tags=29%, list=5%, signal=27%	Ddo/Avpr1a/Avp/Oxt
GOBP_SYNAPSE_ASSEMBLY	GOBP_SYNAPSE_ASSEMBLY	GOBP_SYNAPSE_ASSEMBLY	257	-0.385081	-1.64521	3.99436e-05	0.00587725	0.00550918	4216	tags=37%, list=26%, signal=28%	Plxnc1/Zdhhc2/Cbln1/Sptbn2/Reln/Pdlim5/Ptprs/Plxna1/Nedd8/Lhfpl4/Large1/Drd1/Clstn3/Vldlr/Amigo1/Il1rap/Plxnb1/Rhog/Pdzd11/Ctnnb1/Nrcam/Lrrc4b/Eif4g1/Trim47/Lrrn3/Syndig1/Crmp1/Carmil3/Fgf13/Csmd2/Map1b/Ntn1/Slitrk3/Efnb2/Igsf11/Dock4/Icam5/Shank3/Ntng2/Musk/Dbnl/Prkca/Dner/Abi3/Adnp/Dock1/Pcdhb4/Rab29/Crtac1/Lin7b/Fgfr1/Lrrtm1/Ephb1/Clstn2/Gabra5/Lrrn1/Ptpn13/Sema4d/Nectin3/Caprin1/S1pr2/Gap43/A…
HP_ABNORMAL_BREATH_SOUND	HP_ABNORMAL_BREATH_SOUND	HP_ABNORMAL_BREATH_SOUND	108	-0.489133	-1.84185	4.38408e-05	0.00636232	0.00596387	1923	tags=32%, list=12%, signal=29%	Nfasc/Ttc12/D2hgdh/Dpp9/Csf2ra/Slc25a1/Dnai2/Rsph4a/Kif22/Odad4/Tert/Nos1/Ryr1/Odad3/Dnah9/Odad1/Dnah1/Plp1/Slc18a2/Ccdc40/Dnah5/Spef2/Rsph1/Dsp/Crlf1/Dnaaf3/Zmynd10/Foxj1/Mid1/Dnah11/Hydin/Chat/Slc5a7/Slc18a3/Nkx2-1
HP_INCREASED_CIRCULATING_HEMOGLOBIN_CONCENTRATION	HP_INCREASED_CIRCULATING_HEMOGLOBIN_CONCENTRATION	HP_INCREASED_CIRCULATING_HEMOGLOBIN_CONCENTRATION	12	0.857265	2.01181	4.69341e-05	0.00671919	0.00629838	57	tags=33%, list=0%, signal=33%	Slc4a1/Hba-a1/Hbb-bt/Hba-a2
HP_ABNORMAL_PERICARDIUM_MORPHOLOGY	HP_ABNORMAL_PERICARDIUM_MORPHOLOGY	HP_ABNORMAL_PERICARDIUM_MORPHOLOGY	61	0.581979	1.93106	4.76045e-05	0.00672429	0.00630317	2197	tags=36%, list=13%, signal=31%	Hba-a1/Hba-a2/Fas/Prg4/Spp1/Slc12a3/Itk/Fcgr2b/H2-Eb1/Abcc9/Plvap/Tlr4/H2-D1/Sat1/Nod2/C4b/Tnfrsf1a/Maf/Lacc1/Lmna/Lyst/Ephb4
HP_POLYSPLENIA	HP_POLYSPLENIA	HP_POLYSPLENIA	54	-0.588183	-2.02749	5.21659e-05	0.00727165	0.00681625	1500	tags=37%, list=9%, signal=34%	Dnai2/Rsph4a/Odad4/Gpc4/Cfap45/Efcab1/Odad3/Dnah9/Odad1/Dnah1/Mycn/Ccdc40/Dnah5/Spef2/Rsph1/Dnaaf3/Zmynd10/Foxj1/Dnah11/Hydin
HP_COILED_SPERM_FLAGELLA	HP_COILED_SPERM_FLAGELLA	HP_COILED_SPERM_FLAGELLA	28	-0.71054	-2.11084	6.2494e-05	0.00838052	0.00785568	1967	tags=54%, list=12%, signal=47%	Cfap65/Kcnu1/Dnah7b/Dnah2/Cfap61/Cfap91/Dnah1/Cfap47/Cfap43/Spef2/Stk33/Ttc21a/Lrrc23/Ccdc146/Ak7
GOMF_HORMONE_BINDING	GOMF_HORMONE_BINDING	GOMF_HORMONE_BINDING	78	-0.541282	-1.98245	6.22287e-05	0.00838052	0.00785568	1085	tags=22%, list=7%, signal=20%	Pde3a/Crhr2/Ednrb/Inhba/Lhcgr/Vipr2/Hcrtr2/Galr1/Hcrtr1/Prlr/Lrp2/Avpr1a/Mc3r/Adra2b/Glp1r/Calcr/Cckar
GOMF_MHC_PROTEIN_COMPLEX_BINDING	GOMF_MHC_PROTEIN_COMPLEX_BINDING	GOMF_MHC_PROTEIN_COMPLEX_BINDING	20	0.751732	1.97549	6.14654e-05	0.00838052	0.00785568	752	tags=30%, list=5%, signal=29%	Cd4/H2-Aa/Cd74/H2-Ab1/H2-Eb1/Cd160
GOBP_MICROTUBULE_CYTOSKELETON_ORGANIZATION	GOBP_MICROTUBULE_CYTOSKELETON_ORGANIZATION	GOBP_MICROTUBULE_CYTOSKELETON_ORGANIZATION	595	-0.311465	-1.43685	6.41077e-05	0.00848946	0.00795778	2365	tags=18%, list=14%, signal=16%	Tuba4a/Ccdc78/Tubb4a/Tpx2/Fign/Syne2/Haus8/Cfap46/Cdk5rap2/Tubb5/Fkbp4/Map10/Obsl1/Cgn/Kif19a/Togaram2/Cfap65/Tubb4b/Ttc12/Cntn2/Ift172/Spice1/Nubp1/Crocc/Tubb3/Tuba1a/Cetn2/Tuba1c/Ccdc65/Rgs14/Ccdc66/Inpp5j/Mid1ip1/Spef1/Fignl1/Dnah7b/Dnai2/Cep72/Katna1/Snca/Cfap100/D7Ertd443e/Rsph4a/Cfap206/Slain1/Odad4/Atf5/Tubb6/Map6d1/Nckap5/Tubb2a/Chordc1/Ubxn2b/Dnah2/Rbm14/Mns1/Efcab1/Cryab/Dnai4/Odad3/Cfa…
GOBP_REGULATION_OF_GLIOGENESIS	GOBP_REGULATION_OF_GLIOGENESIS	GOBP_REGULATION_OF_GLIOGENESIS	89	-0.497828	-1.85	7.05919e-05	0.00903083	0.00846526	3903	tags=39%, list=24%, signal=30%	Myrf/Dag1/Hdac1/Rnf112/Ptn/Trp53/Sox8/Ctnnb1/Nr2e1/Ptprz1/Il6st/Ntn1/Dlx2/Vegfc/Dlx1/Hes5/Ldlr/Olig2/Mdk/Trem2/Gpr37l1/Shh/Egr2/Nkx6-2/Trp73/Sox10/Tmem98/Mycn/Nkx2-2/Cxcr4/Gfap/Mag/Lrp2/Myb/Drd3
HP_INTESTINAL_MALROTATION	HP_INTESTINAL_MALROTATION	HP_INTESTINAL_MALROTATION	135	-0.46508	-1.82822	7.14269e-05	0.00903083	0.00846526	2030	tags=23%, list=12%, signal=20%	Nek1/Fbn2/Ttc12/Zfpm2/Dpysl5/Dnai2/Fgfr2/Rsph4a/Odad4/Robo1/Gpc4/Cfap45/Erbb3/Odad3/Dnah9/Odad1/Fgfrl1/Dnah1/Dhcr7/Ccdc40/Dnah5/Spef2/Rsph1/Dnaaf3/Lrp2/Zmynd10/Foxj1/Dnah11/Hydin/Cenpf/Isl1
GOBP_REGULATION_OF_BLOOD_PRESSURE	GOBP_REGULATION_OF_BLOOD_PRESSURE	GOBP_REGULATION_OF_BLOOD_PRESSURE	145	-0.444326	-1.76256	7.16056e-05	0.00903083	0.00846526	996	tags=17%, list=6%, signal=16%	Kl/Nos1/Gch1/Mkks/Tac1/Apln/Ednrb/Npff/Gna12/Mas1/Ptpro/Rarres2/Emp2/Drd5/Tacr3/Slc2a5/Cartpt/Avpr1a/Mc3r/Adra2b/Glp1r/Avp/Oxt/Drd3
GOBP_CELL_MORPHOGENESIS	GOBP_CELL_MORPHOGENESIS	GOBP_CELL_MORPHOGENESIS	904	-0.284595	-1.35422	7.0896e-05	0.00903083	0.00846526	3122	tags=23%, list=19%, signal=20%	Srf/Spag6l/Med1/Enpp2/Cdh20/Dbn1/Map1b/Eps8/Ntn1/Cyfip1/Llgl1/Palmd/Arap1/Ss18/Npr2/Nova2/Megf8/Anapc2/Dvl2/Slitrk3/Efnb2/Map4k4/Lhfpl5/Thy1/Sart3/Arhgap4/Pard3/Cdh8/Dscaml1/Sema5b/Cspg5/Gorasp1/Shank3/Ntng2/Erbb2/Bcl6/Kit/Nfib/Fat1/Nefl/Arpin/Arhgef40/Pdpn/Cdh23/Nfia/Fblim1/Dbnl/Prkca/Cfap44/Sema4g/Tmem108/Plppr4/Col25a1/Chl1/Ednra/Cdc42se1/Abi3/Cdh15/Adnp/Wasf1/Arhgef25/Mdk/Syt17/Obsl1/Ndn/Ptpn…
HP_ERYTHROCYTE_INCLUSION_BODIES	HP_ERYTHROCYTE_INCLUSION_BODIES	HP_ERYTHROCYTE_INCLUSION_BODIES	11	0.850237	1.97811	7.45378e-05	0.00925276	0.00867329	57	tags=27%, list=0%, signal=27%	Hba-a1/Hbb-bt/Hba-a2
HP_ARTHRALGIA	HP_ARTHRALGIA	HP_ARTHRALGIA	154	0.448104	1.70616	7.51121e-05	0.00925276	0.00867329	2088	tags=27%, list=13%, signal=23%	Hbb-bt/Fas/H2-Aa/Ighg2c/C1s1/Spp1/H2-Ab1/Myh3/Col5a1/Tnfrsf11b/Tlr7/Slc12a3/H2-Eb1/Mafb/Col6a1/Slc26a2/Ccn2/Tet2/Tlr4/Nfkb2/Bmp4/Irf5/H2-D1/Sat1/Nod2/C4b/Eln/Tnfrsf1a/Ap1s3/Epor/Stx1a/Xpa/Lacc1/Ercc5/Sfrp4/Ddb2/Bmp6/Lmna/Otulin/Runx1/Xpc
GOBP_MONOAMINE_TRANSPORT	GOBP_MONOAMINE_TRANSPORT	GOBP_MONOAMINE_TRANSPORT	60	-0.568837	-1.97927	7.66126e-05	0.00932912	0.00874487	566	tags=17%, list=3%, signal=16%	Sncg/Slc18a2/Mapk15/Npy2r/Slc29a4/Cartpt/Adra2b/Slc18a3/Oxt/Drd3
GOBP_REPRODUCTIVE_PROCESS	GOBP_REPRODUCTIVE_PROCESS	GOBP_REPRODUCTIVE_PROCESS	1111	-0.273559	-1.32055	8.19859e-05	0.00986999	0.00925186	1849	tags=15%, list=11%, signal=14%	Car12/Sbf1/Plcd4/Tuba1a/Zfpm2/Uprt/Cetn2/Cacna1h/1110017D15Rik/Sebox/Gal3st1/Nectin3/Kcnu1/Th/Parp1/Tmem119/Galnt3/Oprk1/Ccnd1/Fignl1/Smc2/Hspb11/Sulf1/C3/Kif9/Chn2/Shh/Mmp2/Wnt2b/Dusp1/Tekt1/Fgfr2/Dynll1/Morn2/Adcy3/Cd9/Msx1/Lamb1/Gpr3/Cfap206/Serpinf1/Cd38/Acrbp/Esr1/Sphk2/Tbata/Pacrg/Slit3/Pld6/Gfra1/Gabrb1/Gdf10/Pde3a/Paqr7/Tdrd1/Ddr1/Trpc6/Unc5c/Nhlh2/Slit2/Tgfb2/Wnt7a/Spag4/Cfap61/Lhfpl2/Rf…
GOBP_POSITIVE_REGULATION_OF_AMINE_TRANSPORT	GOBP_POSITIVE_REGULATION_OF_AMINE_TRANSPORT	GOBP_POSITIVE_REGULATION_OF_AMINE_TRANSPORT	34	-0.673219	-2.08041	8.58879e-05	0.00989018	0.00927079	464	tags=24%, list=3%, signal=23%	Trh/Slc17a8/Npy2r/Cartpt/Avpr1a/Slc18a3/Avp/Oxt
GOBP_REGULATION_OF_CILIUM_MOVEMENT	GOBP_REGULATION_OF_CILIUM_MOVEMENT	GOBP_REGULATION_OF_CILIUM_MOVEMENT	26	-0.710846	-2.07095	8.33474e-05	0.00989018	0.00927079	1745	tags=50%, list=11%, signal=45%	Ccdc65/Kif9/Rsph4a/Cfap206/Cfap45/Mkks/Tac1/Efcab1/Ccdc40/Cfap43/Tacr3/Dnah11/Ttll6
GOCC_NEURON_PROJECTION_TERMINUS	GOCC_NEURON_PROJECTION_TERMINUS	GOCC_NEURON_PROJECTION_TERMINUS	120	-0.461472	-1.76147	8.52911e-05	0.00989018	0.00927079	1918	tags=19%, list=12%, signal=17%	Epha4/Penk/Prkcg/Oprk1/Unc13a/Snca/Slc32a1/Crhr2/Nos1/Gch1/Npff/Tanc1/Kcna6/Gnrh1/Sncg/Slc18a2/Calb2/Slc17a8/Elfn1/Nts/Cngb1/Slc18a3/Oxt
GOBP_REGULATION_OF_SYNAPSE_STRUCTURE_OR_ACTIVITY	GOBP_REGULATION_OF_SYNAPSE_STRUCTURE_OR_ACTIVITY	GOBP_REGULATION_OF_SYNAPSE_STRUCTURE_OR_ACTIVITY	301	-0.363067	-1.58095	8.54587e-05	0.00989018	0.00927079	4169	tags=35%, list=25%, signal=27%	Cbln1/Reln/Pdlim5/Ptprs/Sybu/Nedd8/Lhfpl4/Slc7a11/Cntnap1/Dag1/Clstn3/Vldlr/Amot/Amigo1/Prmt8/Il1rap/Rhog/Pdzd11/Ctnnb1/Nrcam/Camk2b/Abhd17c/Lrrc4b/Eif4g1/Trim47/Lrrn3/Camkv/Syndig1/Crmp1/Carmil3/Itsn1/Dbn1/Map1b/Ntn1/Cyfip1/Ago2/Anapc2/Slitrk3/Grin2b/Igsf11/Dock4/Cdh8/Icam5/Shank3/Ntng2/Musk/Nefl/Prkca/Plppr4/Abi3/Adnp/Dock1/Tubb5/Crtac1/Lin7b/Fgfr1/Lrrtm1/Epha4/Ephb1/Clstn2/Tuba1a/Lrrn1/Ptpn13/…
GOMF_MHC_CLASS_II_PROTEIN_COMPLEX_BINDING	GOMF_MHC_CLASS_II_PROTEIN_COMPLEX_BINDING	GOMF_MHC_CLASS_II_PROTEIN_COMPLEX_BINDING	16	0.802322	1.99563	9.00354e-05	0.0102563	0.00961397	637	tags=31%, list=4%, signal=30%	Cd4/H2-Aa/Cd74/H2-Ab1/H2-Eb1
GOBP_PHOSPHOLIPASE_C_ACTIVATING_G_PROTEIN_COUPLED_RECEPTOR_SIGNALING_PATHWAY	GOBP_PHOSPHOLIPASE_C_ACTIVATING_G_PROTEIN_COUPLED_RECEPTOR_SIGNALING_PATHWAY	GOBP_PHOSPHOLIPASE_C_ACTIVATING_G_PROTEIN_COUPLED_RECEPTOR_SIGNALING_PATHWAY	116	-0.472628	-1.79211	9.46635e-05	0.0106688	0.0100006	3027	tags=41%, list=18%, signal=34%	Gpr139/F2r/Dgkg/Htr2c/Grm5/Actn2/Ptger3/Oprm1/Gpr27/Pard3/Pth1r/Calca/Htr1b/Dgkq/Chga/Gna15/Ednra/Dgkb/P2ry2/S1pr1/Adora2a/Prkcg/Plch2/Gap43/Oprk1/Orai1/Cx3cr1/P2ry12/Esr1/Gpr83/Adra1d/Slc9a3r1/Grm1/Ano1/Grpr/Ednrb/Trhr/Grp/Mas1/Lpar1/Lhcgr/Drd5/Hcrtr2/Rasgrp4/Dgkk/Mc3r/Cckar/Drd3
GOBP_MATING_BEHAVIOR	GOBP_MATING_BEHAVIOR	GOBP_MATING_BEHAVIOR	27	-0.69876	-2.03958	0.000101752	0.011347	0.0106363	984	tags=30%, list=6%, signal=28%	Nhlh2/Tac1/Ddo/Ednrb/Drd5/Avpr1a/Avp/Oxt
HP_REDUCED_SPERM_MOTILITY	HP_REDUCED_SPERM_MOTILITY	HP_REDUCED_SPERM_MOTILITY	60	-0.559212	-1.94578	0.000109742	0.0120477	0.0112932	929	tags=33%, list=6%, signal=32%	Kcnu1/Dnah7b/Rsph4a/Dnah2/Cfap61/Cfap91/Dnah1/Ccdc40/Cfap47/Cfap43/Spef2/Stk33/Ttc21a/Zmynd10/Lrrc23/Strc/Ccdc146/Hydin/Dnali1/Ak7
HP_TREMOR	HP_TREMOR	HP_TREMOR	594	-0.310417	-1.43131	0.00011031	0.0120477	0.0112932	4224	tags=27%, list=26%, signal=21%	Tctn1/Tmem70/Trim8/Lrpprc/Ddost/Sptbn2/Opa3/Uba5/Kcnj12/Abcb7/Pitrm1/Cacna1c/Mrpl12/Grm7/Fzr1/Aptx/Dlst/Cyp7b1/Lemd2/Kcnc1/Aifm1/Knstrn/Pik3r5/Bscl2/Polg/Vldlr/Gtf2e2/Cars/Clip2/Pla2g6/Pde6d/Sdhaf2/Tcirg1/Uchl1/Sfxn4/Baz1b/Htra2/Tmco1/Atp2b3/Aars2/Slc39a14/Reep2/Gnao1/Tpp1/Pnpla6/Lmnb1/Crat/Eif4g1/Mrps34/Dusp6/Fgf13/Ndrg1/Rnaseh2c/Timm8a1/Jag1/Hspd1/Prkra/Ndnf/Mars1/Ntng2/Pdyn/Coq4/Slc30a10/Atp1a…
HP_SHORT_SPERM_FLAGELLA	HP_SHORT_SPERM_FLAGELLA	HP_SHORT_SPERM_FLAGELLA	30	-0.66786	-2.01333	0.000126147	0.0136368	0.0127828	929	tags=43%, list=6%, signal=41%	Cfap65/Dnah7b/Dnah2/Cfap61/Cfap91/Dnah1/Cfap47/Cfap43/Stk33/Ttc21a/Lrrc23/Ccdc146/Ak7
GOBP_FOREBRAIN_NEURON_DEVELOPMENT	GOBP_FOREBRAIN_NEURON_DEVELOPMENT	GOBP_FOREBRAIN_NEURON_DEVELOPMENT	37	-0.640377	-2.04088	0.000127858	0.0136821	0.0128252	1447	tags=38%, list=9%, signal=35%	Slit1/Fgfr2/Slit3/Atf5/Robo1/Nhlh2/Slit2/Sox1/Rac3/Sema3e/Plxna3/Nrp2/Nrp1/Lhx8
GOBP_CATECHOLAMINE_TRANSPORT	GOBP_CATECHOLAMINE_TRANSPORT	GOBP_CATECHOLAMINE_TRANSPORT	50	-0.586025	-1.97741	0.000135773	0.0143838	0.013483	566	tags=18%, list=3%, signal=17%	Sncg/Slc18a2/Mapk15/Npy2r/Slc29a4/Cartpt/Adra2b/Oxt/Drd3
HP_ALOPECIA	HP_ALOPECIA	HP_ALOPECIA	204	0.419399	1.64135	0.00014201	0.0145571	0.0136454	2173	tags=25%, list=13%, signal=22%	Fas/H2-Aa/Ighg2c/Tgm3/Wnt10a/Ada/Tmprss6/Spp1/Alox12b/H2-Ab1/Mgp/Il7r/Tlr7/Aire/Cdsn/Perp/Gjb6/Fcgr2b/Alx4/H2-Eb1/Lamc2/Blm/Atr/Cwc27/Sox18/Nfkb2/Cldn1/Irf5/H2-D1/Ecm1/Sat1/Wnt5a/Fli1/C4b/Pik3r1/Kctd1/Hr/Trpv3/Plec/Fzd2/Tinf2/Xpa/Eogt/Col18a1/Ercc5/Ddb2/Lmna/Htra1/Srebf1/Xpc/Aloxe3/Nectin4
GOBP_TELENCEPHALON_DEVELOPMENT	GOBP_TELENCEPHALON_DEVELOPMENT	GOBP_TELENCEPHALON_DEVELOPMENT	258	-0.373795	-1.60098	0.000142118	0.0145571	0.0136454	3966	tags=33%, list=24%, signal=25%	Dclk2/Slc7a11/Lhx6/Kcnc1/Large1/Drd1/Dixdc1/Pex5/Tnr/Bbs1/Hdac1/Smo/Aqp1/Ctnnb1/Nr2e1/Fat4/Ccdc85c/Bax/Fgf13/Srf/Fut10/Akirin2/Kdm2b/Dlx2/Shank3/Nfib/Atat1/Nefl/Rara/Dlx1/Hes5/Zic3/Tmem108/Ogdh/Chd7/Syne2/Mdk/Crtac1/Atic/Cntn2/Btbd3/Rpgrip1l/Tuba1a/Alk/Epha5/Kdm6b/Ttc8/P2ry12/Shh/Bcl11b/Slit1/Zeb2/Neurod1/Plxna4/Lamb1/Slc32a1/Trp73/Slit3/Atf5/Ascl1/Filip1/Ephb2/Gria1/Tubb2a/Robo1/Prdm8/Slit2/Btg2…
GOBP_ADAPTIVE_IMMUNE_RESPONSE	GOBP_ADAPTIVE_IMMUNE_RESPONSE	GOBP_ADAPTIVE_IMMUNE_RESPONSE	289	0.393035	1.59795	0.000142201	0.0145571	0.0136454	1791	tags=20%, list=11%, signal=18%	Trbc2/Cd7/Icam1/Cd4/H2-Aa/Ighg2c/Trat1/Cd6/Socs3/Ada/C1s1/Prdm1/Cd74/H2-Ab1/H2-Q1/Il7r/Fcer2a/C7/Il4ra/Bmx/Il12rb1/Aire/Itk/Il6ra/C2/Myo1g/Fcgr2b/H2-Eb1/Tfrc/Havcr2/Anxa1/Cd160/Tnfrsf14/Mef2c/H2-T23/Jak3/Was/Slc11a1/Serping1/Lair1/Rorc/Tlr4/Nfkb2/Il1r1/Kcnj8/H2-D1/Nod2/Atad5/C4b/Shld3/Tap1/Il17ra/Tnfsf13b/Stat5a/Rora/Nbn/Cd46
HP_DECREASED_FERTILITY	HP_DECREASED_FERTILITY	HP_DECREASED_FERTILITY	253	-0.370694	-1.58557	0.000142905	0.0145571	0.0136454	2419	tags=27%, list=15%, signal=23%	Ednra/Chd7/Men1/Gnas/Psmc3ip/Cep112/Obsl1/Ndn/Spry4/Cfap65/Fgfr1/Ttc12/Ift172/Atp7b/Otx2/Zfpm2/Pde11a/Kcnu1/Bbs12/Dnah7b/Ttc8/Dnai2/Cyp11a1/Rsph4a/Odad4/Sox10/Dcc/Dnah2/Cfap61/Mkks/Mns1/Odad3/Dnah9/Cldn2/Odad1/Gpr101/Dnah1/Gnrh1/Ccdc40/Sox3/Sema3e/Cfap47/Cfap43/Rec114/Cfap52/Magel2/Dnah5/Lhcgr/Plcz1/Tacr3/Spef2/Rsph1/Stk33/Ttc21a/Prlr/Tsga10/Dnaaf3/Zmynd10/Foxj1/Lrrc23/Strc/Ccdc146/Dnah11/Prokr2/…
HP_ABNORMALITY_OF_THE_SENSE_OF_SMELL	HP_ABNORMALITY_OF_THE_SENSE_OF_SMELL	HP_ABNORMALITY_OF_THE_SENSE_OF_SMELL	116	-0.466558	-1.76909	0.000146997	0.0148313	0.0139024	1951	tags=22%, list=12%, signal=20%	Fgfr1/Ift172/Atp7b/Otx2/Vps13c/Hyls1/Bbs12/Ttc8/Shh/Snca/Fgfr2/Adcy3/Tert/Sox10/Dcc/Nhlh2/Mkks/Gnrh1/Sox3/Fgf10/Sema3e/Ptch2/Tacr3/Prokr2/Prok2/Prdm12
GOBP_REGULATION_OF_CATECHOLAMINE_SECRETION	GOBP_REGULATION_OF_CATECHOLAMINE_SECRETION	GOBP_REGULATION_OF_CATECHOLAMINE_SECRETION	33	-0.655888	-2.02273	0.000151478	0.0151392	0.0141911	566	tags=18%, list=3%, signal=18%	Sncg/Npy2r/Cartpt/Adra2b/Oxt/Drd3
GOCC_MHC_PROTEIN_COMPLEX	GOCC_MHC_PROTEIN_COMPLEX	GOCC_MHC_PROTEIN_COMPLEX	14	0.803854	1.93397	0.000162944	0.0161202	0.0151106	1324	tags=50%, list=8%, signal=46%	H2-Aa/Cd74/H2-Ab1/H2-Q1/H2-Eb1/H2-T23/H2-D1
HP_FUNCTIONAL_ABNORMALITY_OF_MALE_INTERNAL_GENITALIA	HP_FUNCTIONAL_ABNORMALITY_OF_MALE_INTERNAL_GENITALIA	HP_FUNCTIONAL_ABNORMALITY_OF_MALE_INTERNAL_GENITALIA	212	-0.386614	-1.61359	0.000164337	0.0161202	0.0151106	1967	tags=22%, list=12%, signal=20%	Cfap65/Fgfr1/Ttc12/Ift172/Zfpm2/Pde11a/Kcnu1/Dnah7b/Dnai2/Rsph4a/Odad4/Pola1/Nhlh2/Dnah2/Cfap61/Cfap45/Odad3/Dnah9/Cfap91/Cldn2/Odad1/Dnah1/Gnrh1/Ccdc40/Sox3/Steap3/Cfap47/Cfap43/Dnah5/Lhcgr/Tacr3/Spef2/Rsph1/Stk33/Ttc21a/Dnaaf3/Zmynd10/Foxj1/Lrrc23/Strc/Ccdc146/Dnah11/Prokr2/Hydin/Dnali1/Ak7/Prok2
GOCC_MICROTUBULE	GOCC_MICROTUBULE	GOCC_MICROTUBULE	418	-0.327523	-1.46787	0.000171773	0.0166951	0.0156495	3623	tags=28%, list=22%, signal=23%	Dnal1/Kif3a/Gas2l1/Hid1/Mt3/Reep2/Fsd1/Chmp5/Ttll5/Dnai1/Map1lc3a/Clasp2/Hdac6/Gas2l2/Calm3/Reep3/Rmdn3/Clmp/Fgf13/Tppp/Ndrg1/Spag6l/Map1b/Eml1/Tpgs2/Bex4/Arhgap4/Rusc1/Fam161b/Cct5/Atat1/Kifc3/Tuba1b/Pde4dip/Enkd1/Tuba4a/Tubb4a/Dpysl2/Tpx2/Fign/Haus8/Cdk5rap2/Rcc2/Tubb5/Fkbp4/Map10/Pbxip1/Klhl21/Kif19a/Togaram2/Iqgap2/Tubb4b/Dpp9/Tubb3/Tuba1a/Klc4/Tuba1c/Rgs14/1110017D15Rik/Ccdc66/Mid1ip1/Spef1/…
GOBP_REGULATION_OF_SYSTEM_PROCESS	GOBP_REGULATION_OF_SYSTEM_PROCESS	GOBP_REGULATION_OF_SYSTEM_PROCESS	456	-0.322112	-1.45899	0.000175693	0.0167684	0.0157182	2944	tags=25%, list=18%, signal=21%	Tmem100/Grin2b/Ptger3/Pkp2/Ecrg4/Hcn4/Dock4/Pard3/Cav1/Npr1/Slc8a2/Calca/Shank3/Atpsckmt/Atp1a3/Prkaca/Kit/Prkca/Chga/Jam2/Tmem108/Ednra/Chrna2/Myh6/Scn3b/Hbegf/Gaa/Cnn1/Fxyd1/Tnfrsf21/Crh/Jph2/Zfhx2/Edn3/Gjc3/Jph4/Smad7/Fgfr1/Scn2b/Zc3h12a/Chrna7/Foxo1/Cacna1h/Grin2d/Th/Parp1/S1pr2/Kcne1l/Oprk1/Nr1h3/Mmp2/Dock5/Neurod1/Egr2/Gstm7/Tbxas1/Cd38/Mtg2/Sox10/Gria1/Adra1d/Slc9a3r1/Anxa6/Grm1/Myh7/Nos1/…
GOCC_SYNAPSE	GOCC_SYNAPSE	GOCC_SYNAPSE	1557	-0.254939	-1.25184	0.00017516	0.0167684	0.0157182	4311	tags=28%, list=26%, signal=23%	Dars/Map2k1/Slc29a1/Ranbp6/Sst/Ap1g1/Eif5a/Ly6h/Tenm2/Crhr1/Eps15/Sptb/Cdh10/Slc22a3/Ddn/Plxnc1/Zdhhc2/Ptchd1/Cbln1/Prkce/Sptbn2/Prr12/Wdr1/Napepld/Spg20/Chrm4/Pdlim5/Homer2/Ptprs/Gnb4/Bin1/Ywhah/Plxna1/Canx/Cacna1c/Chrm1/Nedd8/Lhfpl4/Usp46/Myh9/Cttn/Praf2/Grm7/Ppfia4/Rps10/Pls3/Clu/Hnrnpa1/Kcnq2/Vps18/Prr7/Sync/Lgi1/Cntn1/Igsf8/Eif3a/Add1/Cntnap1/Rogdi/Kcnc1/Tln2/Psen2/Large1/Drd1/Dag1/Dixdc1/Ly…
GOBP_NEGATIVE_REGULATION_OF_BLOOD_PRESSURE	GOBP_NEGATIVE_REGULATION_OF_BLOOD_PRESSURE	GOBP_NEGATIVE_REGULATION_OF_BLOOD_PRESSURE	36	-0.63684	-2.00515	0.000178094	0.0168458	0.0157908	996	tags=28%, list=6%, signal=26%	Kl/Nos1/Mkks/Tac1/Apln/Mas1/Drd5/Glp1r/Oxt/Drd3
HP_PERICARDITIS	HP_PERICARDITIS	HP_PERICARDITIS	24	0.715888	1.9716	0.00018513	0.0173563	0.0162694	1845	tags=54%, list=11%, signal=48%	Hba-a1/Hba-a2/Fas/Prg4/Fcgr2b/H2-Eb1/Tlr4/H2-D1/Nod2/C4b/Tnfrsf1a/Maf/Lacc1
HP_ANEMIA_DUE_TO_REDUCED_LIFE_SPAN_OF_RED_CELLS	HP_ANEMIA_DUE_TO_REDUCED_LIFE_SPAN_OF_RED_CELLS	HP_ANEMIA_DUE_TO_REDUCED_LIFE_SPAN_OF_RED_CELLS	116	0.469432	1.72379	0.00019774	0.0183759	0.0172251	1791	tags=22%, list=11%, signal=19%	Slc4a1/Hba-a1/Hbb-bt/Hba-a2/Fas/Ighg2c/Ada/Spp1/Cfh/Gp1ba/Tlr7/Aldoa/Itk/Fcgr2b/H2-Eb1/Epb41/Slc2a1/Was/Nfkb2/Irf5/Sat1/C4b/Ank1/Nbn/Cd46
HP_ABNORMAL_HEMOGLOBIN_CONCENTRATION	HP_ABNORMAL_HEMOGLOBIN_CONCENTRATION	HP_ABNORMAL_HEMOGLOBIN_CONCENTRATION	16	0.788371	1.96093	0.000199573	0.018385	0.0172336	1087	tags=38%, list=7%, signal=35%	Slc4a1/Hba-a1/Hbb-bt/Hba-a2/Cubn/Amn
GOCC_AXONEMAL_MICROTUBULE	GOCC_AXONEMAL_MICROTUBULE	GOCC_AXONEMAL_MICROTUBULE	32	-0.654076	-2.00087	0.000202262	0.0184721	0.0173152	1920	tags=47%, list=12%, signal=41%	Tubb4b/Tuba1a/1110017D15Rik/Tekt1/Cfap206/Pacrg/Cfap45/Mns1/Fam183b/Spag8/Ttc30a1/Cfap52/Cfap161/Tekt2/Ppp1r32
GOBP_HEMATOPOIETIC_STEM_CELL_PROLIFERATION	GOBP_HEMATOPOIETIC_STEM_CELL_PROLIFERATION	GOBP_HEMATOPOIETIC_STEM_CELL_PROLIFERATION	32	0.667061	1.92459	0.000207465	0.0187854	0.0176089	2463	tags=44%, list=15%, signal=37%	Wnt10b/Wnt1/Cd34/Ace/Brca2/Wnt5a/Ang/Pim1/Mecom/Etv6/Runx1/Eif2ak2/Arih2/Atxn1l
GOBP_ANTIGEN_PROCESSING_AND_PRESENTATION_OF_EXOGENOUS_PEPTIDE_ANTIGEN_VIA_MHC_CLASS_II	GOBP_ANTIGEN_PROCESSING_AND_PRESENTATION_OF_EXOGENOUS_PEPTIDE_ANTIGEN_VIA_MHC_CLASS_II	GOBP_ANTIGEN_PROCESSING_AND_PRESENTATION_OF_EXOGENOUS_PEPTIDE_ANTIGEN_VIA_MHC_CLASS_II	19	0.750573	1.94662	0.000210979	0.0189416	0.0177553	1410	tags=32%, list=9%, signal=29%	H2-Aa/Cd74/H2-Ab1/Fcgr2b/H2-Eb1/Ifi30
GOMF_NEUROPEPTIDE_BINDING	GOMF_NEUROPEPTIDE_BINDING	GOMF_NEUROPEPTIDE_BINDING	23	-0.71859	-2.01058	0.00022359	0.0199051	0.0186585	2035	tags=61%, list=12%, signal=53%	Sstr2/Oprm1/Sstr1/Npy5r/Sorl1/Oprk1/Grpr/Sstr4/Gpr37/Galr1/Npbwr1/Prlhr/Gpr149/Mc3r
GOMF_NEUROPEPTIDE_ACTIVITY	GOMF_NEUROPEPTIDE_ACTIVITY	GOMF_NEUROPEPTIDE_ACTIVITY	19	-0.744632	-1.99639	0.000228107	0.020138	0.0188768	1104	tags=58%, list=7%, signal=54%	Crh/Vgf/Penk/Cort/Npff/Grp/Nts/Cartpt/Avp/Gal/Oxt
GOBP_ANTIGEN_PROCESSING_AND_PRESENTATION_OF_EXOGENOUS_PEPTIDE_ANTIGEN	GOBP_ANTIGEN_PROCESSING_AND_PRESENTATION_OF_EXOGENOUS_PEPTIDE_ANTIGEN	GOBP_ANTIGEN_PROCESSING_AND_PRESENTATION_OF_EXOGENOUS_PEPTIDE_ANTIGEN	29	0.679077	1.92671	0.00023357	0.0204499	0.0191692	1410	tags=28%, list=9%, signal=25%	H2-Aa/Cd74/H2-Ab1/H2-Q1/Fcgr2b/H2-Eb1/H2-T23/Ifi30
GOBP_POSITIVE_REGULATION_OF_IMMUNE_SYSTEM_PROCESS	GOBP_POSITIVE_REGULATION_OF_IMMUNE_SYSTEM_PROCESS	GOBP_POSITIVE_REGULATION_OF_IMMUNE_SYSTEM_PROCESS	794	0.31601	1.39465	0.000241409	0.020963	0.0196502	2533	tags=18%, list=15%, signal=16%	Wnt10b/Bst1/Trbc2/Cd7/Ifi204/Cdkn1a/Icam1/Pla2g3/Cd4/Lyve1/H2-Aa/Ighg2c/Trat1/Cd6/Edn1/Nlrp6/Ada/C1s1/Cd74/H2-Ab1/Cfh/H2-Q1/Il7r/Tlr7/Fcer2a/Birc3/Tlr2/C7/Cd14/Il4ra/Bmx/Il12rb1/Dapk2/C5ar1/Rnf39/Itk/Il6ra/Perp/A2m/C2/Myo1g/C5ar2/Cgas/Fcgr2b/H2-Eb1/Tfrc/Naip2/Havcr2/Dpp4/Gata2/Anxa1/Ido1/Colec12/Irak3/Cd160/Map3k8/Vegfd/Tlr9/Tnfrsf18/Tnfrsf14/Id2/Tifa/Mef2c/H2-T23/Slc11a1/Serping1/Trim5/Tox/Plvap…
GOBP_AXONEMAL_DYNEIN_COMPLEX_ASSEMBLY	GOBP_AXONEMAL_DYNEIN_COMPLEX_ASSEMBLY	GOBP_AXONEMAL_DYNEIN_COMPLEX_ASSEMBLY	30	-0.652759	-1.9678	0.000263387	0.0220933	0.0207096	1914	tags=60%, list=12%, signal=53%	Ttc12/Ccdc65/Dnah7b/Dnai2/Cfap100/Odad4/Dnah2/Efcab1/Dnai4/Odad3/Odad1/Dnah1/Ccdc40/Dnah5/Dnaaf3/Zmynd10/Cfap57/Tekt2
GOMF_PEPTIDE_HORMONE_BINDING	GOMF_PEPTIDE_HORMONE_BINDING	GOMF_PEPTIDE_HORMONE_BINDING	44	-0.590779	-1.93197	0.000260064	0.0220933	0.0207096	1065	tags=30%, list=6%, signal=28%	Crhr2/Ednrb/Inhba/Vipr2/Hcrtr2/Galr1/Hcrtr1/Prlr/Avpr1a/Mc3r/Glp1r/Calcr/Cckar
GOBP_ADENYLATE_CYCLASE_ACTIVATING_G_PROTEIN_COUPLED_RECEPTOR_SIGNALING_PATHWAY	GOBP_ADENYLATE_CYCLASE_ACTIVATING_G_PROTEIN_COUPLED_RECEPTOR_SIGNALING_PATHWAY	GOBP_ADENYLATE_CYCLASE_ACTIVATING_G_PROTEIN_COUPLED_RECEPTOR_SIGNALING_PATHWAY	134	-0.433966	-1.70391	0.000256634	0.0220933	0.0207096	1919	tags=31%, list=12%, signal=27%	Pth1r/Calca/Dgkq/Prkaca/Prkca/Chga/Htr7/Gnas/Gnal/Adcy8/S1pr1/Adcy5/Ramp3/Adora2a/Mrap2/Pde2a/S1pr2/Adcy3/Gpr3/Gpr12/Gpr161/Pde3a/Adra1d/Mapk7/Slc9a3r1/Nos1/S1pr5/Adora2b/Adgrf2/Mas1/Lpar1/Gpr101/Lhcgr/Vipr2/Drd5/Galr1/Htr4/Mc3r/Glp1r/Calcr/Drd3
GOBP_REACTIVE_OXYGEN_SPECIES_METABOLIC_PROCESS	GOBP_REACTIVE_OXYGEN_SPECIES_METABOLIC_PROCESS	GOBP_REACTIVE_OXYGEN_SPECIES_METABOLIC_PROCESS	178	0.428508	1.65167	0.000260927	0.0220933	0.0207096	1346	tags=17%, list=8%, signal=16%	Lcn2/Bst1/Hba-a1/Hbb-bt/Cdkn1a/Alox5/Hba-a2/Ier3/Fas/Edn1/Pmaip1/Noxo1/Cyp1b1/Cybb/Akr1c18/Adcy10/Fbln5/Col6a1/Ace2/Abcc9/Agt/Prkn/Ccn2/Tlr4/Sesn1/Pdk4/Thbs1/Pink1/Rac2/Tgfbr2
GOBP_CIRCADIAN_RHYTHM	GOBP_CIRCADIAN_RHYTHM	GOBP_CIRCADIAN_RHYTHM	181	-0.388564	-1.5957	0.000264853	0.0220933	0.0207096	719	tags=16%, list=4%, signal=15%	Mybbp1a/Top1/Crh/Atf4/Phlpp1/Adora2a/Prkcg/Parp1/Sik1/Ngf/Nr1h3/Spsb4/Atf5/Hebp1/Prox1/Mettl3/Magel2/Npy2r/Hcrtr2/Prokr2/Rpe65/Top2a/Cartpt/Mc3r/Prok2/Ntrk1/Nkx2-1/Ngfr/Drd3
GOBP_MUSCLE_CELL_DEVELOPMENT	GOBP_MUSCLE_CELL_DEVELOPMENT	GOBP_MUSCLE_CELL_DEVELOPMENT	156	0.429549	1.63568	0.000272696	0.0225699	0.0211564	1798	tags=21%, list=11%, signal=18%	Wnt10b/Synpo2l/Mybpc1/Shox2/Lox/Tnnt2/Edn1/Adm/Myh3/Klhl40/Wfikkn2/Chrnb1/Mypn/Fhod3/Mylk3/Nrap/Casq1/Col6a1/Fhl2/Six4/Igf1/Bmp4/Asb2/Cacnb4/Nfatc4/Hey2/Smyd3/Sgcz/Tcap/Hes1/Plec/Obscn
HP_DECREASED_NASAL_NITRIC_OXIDE	HP_DECREASED_NASAL_NITRIC_OXIDE	HP_DECREASED_NASAL_NITRIC_OXIDE	28	-0.678759	-2.01642	0.000277445	0.0226097	0.0211937	1745	tags=43%, list=11%, signal=38%	Ccdc65/Dnai2/Rsph4a/Odad4/Cfap45/Odad3/Dnah9/Cfap52/Dnah5/Rsph1/Zmynd10/Dnah11
HP_ABNORMAL_INFERIOR_VENA_CAVA_MORPHOLOGY	HP_ABNORMAL_INFERIOR_VENA_CAVA_MORPHOLOGY	HP_ABNORMAL_INFERIOR_VENA_CAVA_MORPHOLOGY	43	-0.608244	-1.97952	0.000275666	0.0226097	0.0211937	1500	tags=37%, list=9%, signal=34%	Dnai2/Rsph4a/Odad4/Odad3/Dnah9/Odad1/Dnah1/Ccdc40/Dnah5/Spef2/Rsph1/Dnaaf3/Zmynd10/Foxj1/Dnah11/Hydin
HP_ABNORMAL_VENA_CAVA_MORPHOLOGY	HP_ABNORMAL_VENA_CAVA_MORPHOLOGY	HP_ABNORMAL_VENA_CAVA_MORPHOLOGY	73	-0.516443	-1.86575	0.000289203	0.0233879	0.0219232	1590	tags=27%, list=10%, signal=25%	Rbm10/Dnai2/Rsph4a/Odad4/Efcab1/Odad3/Dnah9/Odad1/Dnah1/Ccdc40/Dnah5/Spef2/Rsph1/Dnaaf3/Zmynd10/Foxj1/Mid1/Dnah11/Hydin/Prkcd
HP_PRURITUS	HP_PRURITUS	HP_PRURITUS	104	0.48751	1.75931	0.000293255	0.0235359	0.0220619	2510	tags=32%, list=15%, signal=27%	Scn10a/Slc17a9/Ada/Alox12b/H2-Ab1/Osmr/Il7r/Card14/Il12rb1/Cdsn/Cst6/Perp/H2-Eb1/Asprv1/Atp8b1/Tet2/Brca2/St14/Cldn1/Irf5/Cast/Fli1/Il17ra/Trpv3/Usp53/Plec/Epor/Runx1/Aloxe3/Epas1/Trpm4/Cftr/Stx3
GOBP_ADENYLATE_CYCLASE_MODULATING_G_PROTEIN_COUPLED_RECEPTOR_SIGNALING_PATHWAY	GOBP_ADENYLATE_CYCLASE_MODULATING_G_PROTEIN_COUPLED_RECEPTOR_SIGNALING_PATHWAY	GOBP_ADENYLATE_CYCLASE_MODULATING_G_PROTEIN_COUPLED_RECEPTOR_SIGNALING_PATHWAY	198	-0.388961	-1.61136	0.000298903	0.0236955	0.0222116	2779	tags=33%, list=17%, signal=28%	Gpr176/Gpr61/Rit2/Prkar2b/Sstr2/Grm5/Ptger3/Oprm1/Pth1r/Calca/Htr1b/Dgkq/Prkaca/Chrm5/Prkca/Chga/Htr7/Ednra/Gnas/Gnal/Pth2r/Adcy8/S1pr1/Adcy5/Ramp3/Adora2a/Mrap2/Grm4/Pde2a/S1pr2/Oprk1/P2ry12/Gpr37l1/Grk5/Adcy3/Htr1d/Gpr3/Gpr12/Grm3/Gpr161/Cort/Pde3a/Adra1d/Crhr2/Mapk7/Slc9a3r1/Grm1/Nos1/S1pr5/Adora2b/Gna12/Adgrf2/Mas1/Lpar1/Gpr101/Gpr37/Lhcgr/Npy2r/Vipr2/Drd5/Galr1/Htr4/Mc3r/Glp1r/Calcr/Drd3
GOBP_ADAPTIVE_IMMUNE_RESPONSE_BASED_ON_SOMATIC_RECOMBINATION_OF_IMMUNE_RECEPTORS_BUILT_FROM_IMMUNOGLOBULIN_SUPERFAMILY_DOMAINS	GOBP_ADAPTIVE_IMMUNE_RESPONSE_BASED_ON_SOMATIC_RECOMBINATION_OF_IMMUNE_RECEPTORS_BUILT_FROM_IMMUNOGLOBULIN_SUPERFAMILY_DOMAINS	GOBP_ADAPTIVE_IMMUNE_RESPONSE_BASED_ON_SOMATIC_RECOMBINATION_OF_IMMUNE_RECEPTORS_BUILT_FROM_IMMUNOGLOBULIN_SUPERFAMILY_DOMAINS	208	0.403852	1.58731	0.000299717	0.0236955	0.0222116	3037	tags=30%, list=19%, signal=25%	Cd7/Icam1/Cd4/Ighg2c/Socs3/Ada/C1s1/Cd74/H2-Q1/Il7r/Fcer2a/C7/Il4ra/Il12rb1/Aire/Il6ra/C2/Myo1g/Fcgr2b/H2-Eb1/Tfrc/Havcr2/Anxa1/Mef2c/H2-T23/Jak3/Was/Slc11a1/Serping1/Rorc/Tlr4/Nfkb2/Il1r1/H2-D1/Atad5/C4b/Shld3/Il17ra/Tnfsf13b/Stat5a/Rora/Nbn/Cd46/Ptprc/Mlh1/Trpm4/Mill2/Cyrib/Inpp5d/Shld2/Rnf8/Stat6/Dennd1b/Cracr2a/Pms2/Il18bp/Map3k7/Ripk2/Fbxo38/H2-M3/Hfe/Csf2rb2/Aplf
HP_RETINAL_DYSTROPHY	HP_RETINAL_DYSTROPHY	HP_RETINAL_DYSTROPHY	307	-0.346814	-1.51111	0.000308118	0.0241792	0.022665	3869	tags=30%, list=24%, signal=23%	Cnnm4/Large1/Dnaaf5/Dag1/Atp5d/Pex5/Bbs1/Ift122/Arl2bp/Ctsd/Dnajb13/Dnal1/Hid1/Nyx/Ttll5/Pnpla6/Slc35a2/Dnai1/Ccnq/Gas2l2/Mak/Alms1/Spag1/Ahr/Sh2b1/Ddr2/Atp5e/Hspd1/Efemp1/Myo6/Zfp513/Ints11/Cdh23/Ndufa1/Ap3b2/Ggcx/Pex16/Zfp423/Mvk/Nek1/Piga/Ttc12/Pex10/Ift172/Otx2/Rpgrip1l/Bbs12/Fdxr/Ttc8/Rdh5/Pex12/Ush1g/Dnai2/Fgfr2/Reep6/Rsph4a/Agbl5/Odad4/Tmem231/Chst5/Cep41/Crppa/Adgrv1/Rdh12/Mkks/Pomt1/Crya…
HP_CHRONIC_RHINITIS	HP_CHRONIC_RHINITIS	HP_CHRONIC_RHINITIS	50	-0.571561	-1.9286	0.000310712	0.0242036	0.0226878	1500	tags=32%, list=9%, signal=29%	Dnai2/Rsph4a/Odad4/Odad3/Dnah9/Odad1/Dnah1/Ccdc40/Dnah5/Spef2/Rsph1/Dnaaf3/Zmynd10/Foxj1/Dnah11/Hydin
GOCC_SIDE_OF_MEMBRANE	GOCC_SIDE_OF_MEMBRANE	GOCC_SIDE_OF_MEMBRANE	467	0.33915	1.43831	0.000329863	0.0255078	0.0239103	1993	tags=18%, list=12%, signal=16%	Slc4a1/Bst1/Itgad/Ackr2/Msln/Icam1/Cd4/Fas/H2-Aa/Tgm3/Socs3/Ada/Glra1/Cd74/H2-Ab1/Cd163/Osmr/H2-Q1/Il7r/Gp1ba/Slamf9/Slc2a4/Fcer2a/Cd52/Cd14/Il4ra/Il12rb1/Asgr1/Cd34/Atp2c2/Itgal/Il6ra/Cdh1/Fcgr2b/H2-Eb1/Plekha4/Tfrc/Pecam1/Cd160/Robo4/Myzap/Tnfrsf18/Tnfrsf14/Tnfrsf10b/Lepr/Frmd6/Clec14a/H2-T23/Ly75/Cubn/Jak3/Ace/Abcb1a/Tlr4/Tfpi/Adam21/Tfr2/Abcc4/St14/Ermap/Il1r1/Thbs1/Stac2/H2-D1/Tgfbr2/Reck/Cn…
GOBP_ANTIGEN_PROCESSING_AND_PRESENTATION	GOBP_ANTIGEN_PROCESSING_AND_PRESENTATION	GOBP_ANTIGEN_PROCESSING_AND_PRESENTATION	82	0.524414	1.81918	0.000336297	0.0258169	0.0242	1500	tags=23%, list=9%, signal=21%	Icam1/H2-Aa/Cd74/H2-Ab1/H2-Q1/Fcer2a/Fcgr2b/H2-Eb1/H2-T23/Was/Rab33a/Slc11a1/Ace/Thbs1/H2-D1/Nod2/Ifi30/Wdfy4/Tap1
GOCC_TERMINAL_BOUTON	GOCC_TERMINAL_BOUTON	GOCC_TERMINAL_BOUTON	39	-0.609735	-1.9544	0.000343011	0.0261428	0.0245056	560	tags=18%, list=3%, signal=17%	Unc13a/Snca/Slc18a2/Calb2/Cngb1/Slc18a3/Oxt
GOBP_ADENYLATE_CYCLASE_ACTIVATING_DOPAMINE_RECEPTOR_SIGNALING_PATHWAY	GOBP_ADENYLATE_CYCLASE_ACTIVATING_DOPAMINE_RECEPTOR_SIGNALING_PATHWAY	GOBP_ADENYLATE_CYCLASE_ACTIVATING_DOPAMINE_RECEPTOR_SIGNALING_PATHWAY	11	-0.823603	-1.91512	0.000347017	0.0262593	0.0246147	2291	tags=55%, list=14%, signal=47%	Gnas/Gnal/Adcy5/Slc9a3r1/Drd5/Drd3
GOBP_REGULATION_OF_NEUROGENESIS	GOBP_REGULATION_OF_NEUROGENESIS	GOBP_REGULATION_OF_NEUROGENESIS	334	-0.337046	-1.48232	0.000352208	0.0264631	0.0248058	3851	tags=33%, list=23%, signal=26%	Dag1/D130043K22Rik/Chodl/Tnr/Hdac1/Sema6c/Amigo1/Rnf112/Fbxw8/Ptn/Trp53/Smo/Dll1/Sox8/Plxnb1/Dll3/Ctnnb1/Mt3/Nr2e1/Camk2b/Lig4/Hey1/Hdac6/Dll4/Rgma/Fgf13/Ptprz1/Srf/Il6st/Dbn1/Map1b/Ntn1/Grm5/Megf8/Anapc2/Oprm1/Thy1/Arhgap4/Dlx2/Gorasp1/Shank3/Kit/Nefl/Vegfc/Dlx1/Hes5/Cx3cl1/Hltf/Ldlr/Chd7/Hap1/Adnp/Olig2/Mdk/Obsl1/Metrn/Epha4/Rassf10/Sorl1/Trem2/Rgs14/Sema4d/Dpysl5/Caprin1/Ngf/Cx3cr1/Gpr37l1/Shh…
GOBP_ENSHEATHMENT_OF_NEURONS	GOBP_ENSHEATHMENT_OF_NEURONS	GOBP_ENSHEATHMENT_OF_NEURONS	147	-0.417591	-1.6626	0.000379303	0.0282981	0.0265259	4137	tags=39%, list=25%, signal=30%	Nab1/Map2k2/Clu/Cntn1/Cntnap1/Serinc5/Myrf/Large1/Dag1/Amigo1/Ptn/Ctnnb1/Hras/B4galt5/Abcd1/Ptprz1/Tppp/Ndrg1/Mbp/Acsbg1/Pard3/Erbb2/Cldn11/Rara/Hes5/Jam2/Olig2/Tnfrsf21/Prx/Lgi4/Gjc3/Nfasc/Cntn2/Gal3st1/Gpc1/Cmtm8/Pllp/Egr2/Akt2/Cd9/Nkx6-2/Sox10/Kcnj10/Hexa/Erbb3/Tmem98/Sh3tc2/Myoc/Lpar1/Plp1/Cdk18/Bcas1/Cxcr4/Fa2h/Itgb4/Mag/Ugt8a/Klk6
GOMF_STRUCTURAL_CONSTITUENT_OF_CHROMATIN	GOMF_STRUCTURAL_CONSTITUENT_OF_CHROMATIN	GOMF_STRUCTURAL_CONSTITUENT_OF_CHROMATIN	18	-0.732535	-1.94913	0.000393488	0.0290838	0.0272624	718	tags=28%, list=4%, signal=27%	H4c14/H1f2/H2bc4/H2bc6/H3c15
GOCC_T_CELL_RECEPTOR_COMPLEX	GOCC_T_CELL_RECEPTOR_COMPLEX	GOCC_T_CELL_RECEPTOR_COMPLEX	11	0.821846	1.91206	0.000395325	0.0290838	0.0272624	115	tags=36%, list=1%, signal=36%	Trbc2/Cd4/Trat1/Cd6
HP_PRODUCTIVE_COUGH	HP_PRODUCTIVE_COUGH	HP_PRODUCTIVE_COUGH	57	-0.557275	-1.92293	0.000405867	0.0296534	0.0277963	1500	tags=30%, list=9%, signal=27%	Dnai2/Rsph4a/Odad4/Nabp1/Odad3/Dnah9/Odad1/Dnah1/Ccdc40/Dnah5/Spef2/Rsph1/Dnaaf3/Zmynd10/Foxj1/Dnah11/Hydin
HP_ABSENCE_OF_PUBERTAL_DEVELOPMENT	HP_ABSENCE_OF_PUBERTAL_DEVELOPMENT	HP_ABSENCE_OF_PUBERTAL_DEVELOPMENT	24	-0.688636	-1.94356	0.000416082	0.0301916	0.0283007	3429	tags=67%, list=21%, signal=53%	Nsmf/Fat4/Dusp6/Dhx37/Dchs1/Il17rd/Chd7/Spry4/Fgfr1/Esr1/Nhlh2/Gnrh1/Magel2/Tacr3/Prokr2/Prok2
GOBP_ADULT_BEHAVIOR	GOBP_ADULT_BEHAVIOR	GOBP_ADULT_BEHAVIOR	129	-0.441569	-1.713	0.000426725	0.0307532	0.0288272	2558	tags=25%, list=16%, signal=21%	Gigyf2/Chl1/Chd7/Cln8/Fosb/Lgi4/Chrna5/Zfhx2/Epha4/Cntn2/Tuba1a/Alk/Grin2d/Sez6/Oprk1/Snca/Ccnd2/Fxn/Kcnj10/Trh/Nr4a2/Cnp/Efnb3/Hexa/Pcdh17/Sncg/Slitrk6/Nr4a3/Zic1/Cartpt/Gbx1/Drd3
GOBP_REGULATION_OF_OLIGODENDROCYTE_DIFFERENTIATION	GOBP_REGULATION_OF_OLIGODENDROCYTE_DIFFERENTIATION	GOBP_REGULATION_OF_OLIGODENDROCYTE_DIFFERENTIATION	41	-0.609227	-1.97654	0.000440012	0.0312851	0.0293258	4181	tags=59%, list=25%, signal=44%	Daam2/Wdr1/Myrf/Dag1/Hdac1/Ptn/Ctnnb1/Ptprz1/Dlx2/Dlx1/Hes5/Olig2/Mdk/Tnfrsf21/Shh/Nkx6-2/Trp73/Sox1/Slc45a3/Tmem98/Nkx2-2/Cxcr4/Opalin/Drd3
GOBP_RESPONSE_TO_ALKALOID	GOBP_RESPONSE_TO_ALKALOID	GOBP_RESPONSE_TO_ALKALOID	83	-0.492246	-1.81347	0.000438626	0.0312851	0.0293258	2755	tags=30%, list=17%, signal=25%	Htr1b/Cad/Bche/Hdac5/Cacng4/Gnal/Fosb/Crh/Adcy8/Adora2a/Prkcg/Oprk1/Recql5/Snca/St8sia2/Gstm7/Gria1/Ryr1/Ryr3/Gprin3/Drd5/Tacr3/Cartpt/Oxt/Drd3
GOBP_HIPPOCAMPUS_DEVELOPMENT	GOBP_HIPPOCAMPUS_DEVELOPMENT	GOBP_HIPPOCAMPUS_DEVELOPMENT	89	-0.466349	-1.73302	0.000492501	0.0347765	0.0325985	4145	tags=40%, list=25%, signal=30%	Reln/Ptprs/Dclk2/Large1/Drd1/Bbs1/Hdac1/Smo/Nr2e1/Fgf13/Srf/Dlx2/Atat1/Nefl/Rara/Dlx1/Zic3/Tmem108/Ogdh/Mdk/Tuba1a/Alk/Epha5/Kdm6b/Zeb2/Neurod1/Slc32a1/Trp73/Btg2/Mkks/Prox1/Neurod6/Plxna3/Nr4a3/Zic1/Nkx2-1
GOBP_POSITIVE_REGULATION_OF_IMMUNE_RESPONSE	GOBP_POSITIVE_REGULATION_OF_IMMUNE_RESPONSE	GOBP_POSITIVE_REGULATION_OF_IMMUNE_RESPONSE	553	0.323639	1.3897	0.000495682	0.0347765	0.0325985	2940	tags=23%, list=18%, signal=19%	Trbc2/Cd7/Ifi204/Cd4/H2-Aa/Ighg2c/Trat1/Nlrp6/Ada/C1s1/Cd74/H2-Ab1/Cfh/H2-Q1/Tlr7/Fcer2a/Birc3/Tlr2/C7/Cd14/Il4ra/Bmx/Il12rb1/C5ar1/Rnf39/Itk/A2m/C2/Myo1g/C5ar2/Cgas/Fcgr2b/H2-Eb1/Tfrc/Naip2/Havcr2/Anxa1/Ido1/Colec12/Irak3/Cd160/Tlr9/Tifa/Mef2c/H2-T23/Slc11a1/Serping1/Trim5/Tlr4/Ermap/Il1r1/Lpxn/Cmtm3/Irf5/Aim2/Kcnj8/H2-D1/Wdfy1/Cd2ap/Nod2/Blnk/Atad5/Wnt5a/Cacnb4/Casp1/C4b/Shld3/Spsb3/Ezr/Nfkbia/…
GOMF_AMIDE_BINDING	GOMF_AMIDE_BINDING	GOMF_AMIDE_BINDING	200	-0.38438	-1.59596	0.000499044	0.034782	0.0326037	2971	tags=27%, list=18%, signal=22%	Npr2/Grin2b/Soat1/Scarb1/Itm2a/Ldlrad3/Npr1/Pth1r/Atp1a3/Gss/Bche/Fasn/Col25a1/Ldlr/Cln8/Fkbp4/Pth2r/Acvr1/Epha4/Chrna7/Ramp3/Gltp/Sorl1/Csf2ra/Trem2/Hmgcr/Itgam/Acot7/Gstm7/Ache/Ephb2/Gria1/Crhr2/Tgfb2/Cryab/Ednrb/Inhba/Gsap/Mthfs/Slc46a1/Pltp/Vipr2/Hcrtr2/Galr1/Mag/Hcrtr1/Prlr/Cd36/Avpr1a/Mc3r/Glp1r/Ngfr/Calcr/Cckar
HP_ABNORMALITY_OF_THE_PULMONARY_VEINS	HP_ABNORMALITY_OF_THE_PULMONARY_VEINS	HP_ABNORMALITY_OF_THE_PULMONARY_VEINS	70	-0.507405	-1.82004	0.000502847	0.034818	0.0326375	1565	tags=27%, list=10%, signal=25%	Rspo2/Dnai2/Rsph4a/Odad4/Gpc4/Odad3/Dnah9/Odad1/Dnah1/Ccdc40/Hes7/Dnah5/Spef2/Rsph1/Dnaaf3/Zmynd10/Foxj1/Dnah11/Hydin
HP_ABNORMAL_ATRIAL_ARRANGEMENT	HP_ABNORMAL_ATRIAL_ARRANGEMENT	HP_ABNORMAL_ATRIAL_ARRANGEMENT	41	-0.60593	-1.96585	0.000506914	0.0348717	0.0326878	1500	tags=39%, list=9%, signal=36%	Dnai2/Rsph4a/Odad4/Odad3/Dnah9/Odad1/Dnah1/Ccdc40/Dnah5/Spef2/Rsph1/Dnaaf3/Zmynd10/Foxj1/Dnah11/Hydin
HP_APLASIA_HYPOPLASIA_OF_THE_SPLEEN	HP_APLASIA_HYPOPLASIA_OF_THE_SPLEEN	HP_APLASIA_HYPOPLASIA_OF_THE_SPLEEN	81	-0.485917	-1.77524	0.000520457	0.0355724	0.0333446	1914	tags=32%, list=12%, signal=28%	Ttc12/Rpgrip1l/Fam111a/Orai1/Dnai2/Zeb2/Rsph4a/Odad4/Tmem231/Mns1/Efcab1/Odad3/Dnah9/Odad1/Dnah1/Mycn/Ccdc40/Dnah5/Spef2/Rsph1/Dnaaf3/Zmynd10/Tmem107/Foxj1/Dnah11/Hydin
GOCC_AXONEMAL_DOUBLET_MICROTUBULE	GOCC_AXONEMAL_DOUBLET_MICROTUBULE	GOCC_AXONEMAL_DOUBLET_MICROTUBULE	26	-0.670116	-1.95229	0.000536355	0.0363625	0.0340852	1727	tags=50%, list=11%, signal=45%	1110017D15Rik/Cfap100/Tekt1/Cfap206/Pacrg/Cfap45/Mns1/Fam183b/Spag8/Cfap52/Cfap161/Tekt2/Ppp1r32
HP_ABSENCE_OF_SECONDARY_SEX_CHARACTERISTICS	HP_ABSENCE_OF_SECONDARY_SEX_CHARACTERISTICS	HP_ABSENCE_OF_SECONDARY_SEX_CHARACTERISTICS	27	-0.651626	-1.902	0.000542315	0.0363625	0.0340852	2392	tags=63%, list=15%, signal=54%	Nsmf/Dusp6/Dhx37/Chd7/Spry4/Fgfr1/Otx2/Zfpm2/Cyp11a1/Esr1/Pola1/Nhlh2/Gnrh1/Sox3/Tacr3/Prokr2/Prok2
GOBP_REGULATION_OF_MICROTUBULE_BASED_MOVEMENT	GOBP_REGULATION_OF_MICROTUBULE_BASED_MOVEMENT	GOBP_REGULATION_OF_MICROTUBULE_BASED_MOVEMENT	42	-0.567865	-1.84225	0.000540043	0.0363625	0.0340852	1745	tags=31%, list=11%, signal=28%	Ccdc65/Kif9/Rsph4a/Cfap206/Cfap45/Mkks/Tac1/Efcab1/Ccdc40/Cfap43/Tacr3/Dnah11/Ttll6
GOMF_PATTERN_RECOGNITION_RECEPTOR_ACTIVITY	GOMF_PATTERN_RECOGNITION_RECEPTOR_ACTIVITY	GOMF_PATTERN_RECOGNITION_RECEPTOR_ACTIVITY	23	0.694688	1.8928	0.000551527	0.0367477	0.0344462	1369	tags=61%, list=8%, signal=56%	Nlrp6/Tlr7/Fcer2a/Tlr2/Cd14/Asgr1/Pglyrp1/Colec12/Tlr9/Ptafr/Trim5/Tlr4/Aim2/Nod2
HP_ABNORMAL_GERM_CELL_MORPHOLOGY	HP_ABNORMAL_GERM_CELL_MORPHOLOGY	HP_ABNORMAL_GERM_CELL_MORPHOLOGY	49	-0.565347	-1.90033	0.00055933	0.0370347	0.0347153	929	tags=31%, list=6%, signal=29%	Dnah2/Cfap61/Cfap91/Dnah1/Cfap47/Cfap43/Spef2/Stk33/Ttc21a/Tsga10/Lrrc23/Strc/Ccdc146/Dnali1/Ak7
GOBP_REGULATION_OF_VIRAL_ENTRY_INTO_HOST_CELL	GOBP_REGULATION_OF_VIRAL_ENTRY_INTO_HOST_CELL	GOBP_REGULATION_OF_VIRAL_ENTRY_INTO_HOST_CELL	19	0.732075	1.89865	0.000564012	0.0370844	0.0347619	1785	tags=32%, list=11%, signal=28%	Ch25h/Cd4/Cd74/H2-Eb1/Trim5/Hs3st5
HP_THYROIDITIS	HP_THYROIDITIS	HP_THYROIDITIS	33	0.642852	1.86836	0.000567083	0.0370844	0.0347619	283	tags=21%, list=2%, signal=21%	Fas/H2-Aa/Ada/C1s1/H2-Ab1/Il7r/Slc12a3
HP_INFERTILITY	HP_INFERTILITY	HP_INFERTILITY	197	-0.381099	-1.57582	0.000591357	0.0382002	0.0358079	2214	tags=28%, list=13%, signal=24%	Psmc3ip/Cep112/Ndn/Spry4/Cfap65/Ttc12/Ift172/Atp7b/Otx2/Zfpm2/Kcnu1/Bbs12/Dnah7b/Ttc8/Dnai2/Rsph4a/Odad4/Dnah2/Cfap61/Mkks/Mns1/Odad3/Dnah9/Cldn2/Odad1/Gpr101/Dnah1/Gnrh1/Ccdc40/Sox3/Sema3e/Cfap47/Cfap43/Rec114/Cfap52/Magel2/Dnah5/Lhcgr/Plcz1/Spef2/Rsph1/Stk33/Ttc21a/Prlr/Tsga10/Dnaaf3/Zmynd10/Foxj1/Lrrc23/Strc/Ccdc146/Dnah11/Hydin/Dnali1/Ak7
GOBP_REGULATION_OF_TRANS_SYNAPTIC_SIGNALING	GOBP_REGULATION_OF_TRANS_SYNAPTIC_SIGNALING	GOBP_REGULATION_OF_TRANS_SYNAPTIC_SIGNALING	465	-0.312908	-1.41654	0.000589755	0.0382002	0.0358079	3563	tags=27%, list=22%, signal=21%	Hras/Nr2e1/Arrb2/Camk2b/Gnao1/Snx14/Shank1/Nsmf/Grin3a/Hdac6/F2r/Sorcs2/Camkv/Calm3/Slc4a8/Clmp/Prkar2b/Nefh/Grin2c/Srf/Dbn1/Map1b/Cyfip1/Cacng5/Grm5/Nalcn/Tyrobp/Anapc2/Grin2b/Igsf11/Slc8a2/Cspg5/Shank3/Ntng2/Prkaca/Kit/Nefl/Stx4a/Ywhag/Rara/Bche/Cx3cl1/Tmem108/Plppr4/Cacng4/Hap1/Ggcx/Adnp/Ina/Mctp2/Crh/Chrna5/Atf4/Npy5r/Vgf/Jph4/Lrrtm1/Adcy8/Epha4/Ephb1/Cntn2/Sncaip/Clstn2/Chrna7/Shisa9/Penk/Ad…
GOBP_INTERSTRAND_CROSS_LINK_REPAIR	GOBP_INTERSTRAND_CROSS_LINK_REPAIR	GOBP_INTERSTRAND_CROSS_LINK_REPAIR	39	0.609967	1.83073	0.000604682	0.0388242	0.0363928	2551	tags=38%, list=16%, signal=33%	Poln/Rad51ap1/Fancm/Atr/Dclre1b/Mcm8/Fanca/BC055324/Dclre1a/Cenps/Xpa/Fancb/Fan1/Rnf8/Fancd2
GOBP_G_PROTEIN_COUPLED_DOPAMINE_RECEPTOR_SIGNALING_PATHWAY	GOBP_G_PROTEIN_COUPLED_DOPAMINE_RECEPTOR_SIGNALING_PATHWAY	GOBP_G_PROTEIN_COUPLED_DOPAMINE_RECEPTOR_SIGNALING_PATHWAY	33	-0.624604	-1.92625	0.000632138	0.039755	0.0372653	2291	tags=27%, list=14%, signal=24%	Gnas/Gnal/Rgs9/Rgs8/Adcy5/Alk/Slc9a3r1/Drd5/Drd3
GOCC_DYNEIN_COMPLEX	GOCC_DYNEIN_COMPLEX	GOCC_DYNEIN_COMPLEX	49	-0.56073	-1.88481	0.000635354	0.039755	0.0372653	1745	tags=33%, list=11%, signal=29%	Ccdc65/Dnah7b/Dnai2/Dynll1/Dnah2/Dnai4/Dnah9/Odad1/Dnah1/Dnah3/Dnah12/Dnah5/Dnah11/Dnah6/Dynlrb2/Dnali1
HP_RETICULOCYTOSIS	HP_RETICULOCYTOSIS	HP_RETICULOCYTOSIS	32	0.643248	1.85589	0.000637942	0.039755	0.0372653	2160	tags=38%, list=13%, signal=33%	Slc4a1/Hbb-bt/Fas/Cfh/Epb41/Slc2a1/Cubn/Amn/Ank1/Mttp/Gypc/Nt5c3
HP_ATELECTASIS	HP_ATELECTASIS	HP_ATELECTASIS	66	-0.522596	-1.85476	0.000627879	0.039755	0.0372653	1500	tags=30%, list=9%, signal=28%	Dnai2/Rsph4a/Ltbp4/Trp73/Odad4/Odad3/Dnah9/Odad1/Dnah1/Ccdc40/Cxcr4/Dnah5/Spef2/Rsph1/Dnaaf3/Zmynd10/Foxj1/Dnah11/Hydin/Nkx2-1
HP_AGENESIS_OF_CORPUS_CALLOSUM	HP_AGENESIS_OF_CORPUS_CALLOSUM	HP_AGENESIS_OF_CORPUS_CALLOSUM	335	-0.334292	-1.47013	0.000624479	0.039755	0.0372653	4723	tags=32%, list=29%, signal=23%	B4gat1/Dnal4/Fktn/Dhx16/Cilk1/Arid1b/Puf60/Polr3a/Fra10ac1/Abat/Spen/Hccs/Porcn/Dync2i1/Dph2/Yars/Pycr2/Ap1g1/Tbck/Lrpprc/Reln/Luzp1/Sox2/Plxna1/Taf13/Nup37/Lmnb2/Zbtb18/Cpt2/Large1/Dag1/Tnr/Gtf2e2/Cars/Smo/Dll1/mt-Co2/Ttc5/Disp1/Ptdss1/Ift80/Prrx1/Fat4/Ears2/Slc25a19/Pdhb/Flvcr2/Ntn1/C2cd3/Eml1/Dhcr24/Dpf2/Dchs1/Pdyn/Frmd4a/Nfib/Ints11/Pdpn/Nfia/Gpc3/Cdk5rap2/Piezo2/Tubb5/Dpyd/Fgfr1/Otx2/Tubb3/M…
HP_SKIN_RASH	HP_SKIN_RASH	HP_SKIN_RASH	126	0.45536	1.69169	0.000650134	0.0402779	0.0377554	2383	tags=29%, list=15%, signal=25%	Slc4a1/Ighg2c/Ada/Spp1/Tlr7/Cybb/Elf4/Fcgr2b/H2-Eb1/Col6a1/Atp8b1/Blm/Jak3/Tet2/Lrrc8a/Irf5/H2-D1/Sat1/Nod2/Blnk/C4b/Il17ra/Pik3r1/Ank1/Tnfrsf1a/Lacc1/Ercc5/Dnajc21/Otulin/Runx1/Lyst/Ptprc/Cbs/Kdsr/Stxbp2/Irf1
GOBP_ORGANIC_HYDROXY_COMPOUND_TRANSPORT	GOBP_ORGANIC_HYDROXY_COMPOUND_TRANSPORT	GOBP_ORGANIC_HYDROXY_COMPOUND_TRANSPORT	203	-0.38391	-1.59086	0.000656449	0.0404327	0.0379005	566	tags=9%, list=3%, signal=9%	Sncg/Slc18a2/Mapk15/Lcat/Pltp/Npy2r/Slc5a3/Galr1/Myb/Slc29a4/Cd36/Cartpt/Adra2b/Slc10a4/Slc18a3/Gal/Oxt/Drd3
GOBP_REGULATION_OF_INFLAMMATORY_RESPONSE	GOBP_REGULATION_OF_INFLAMMATORY_RESPONSE	GOBP_REGULATION_OF_INFLAMMATORY_RESPONSE	282	0.369336	1.50084	0.000663671	0.0406412	0.038096	2551	tags=25%, list=16%, signal=21%	Bst1/Alox5/Pla2g3/Ier3/Socs3/Nlrp6/Ada/Osmr/Tlr7/Birc3/Tlr2/Casp12/Ptgis/Elf4/Foxf1/Pparg/Camk2n1/Pglyrp1/Fcgr2b/H2-Eb1/Naip2/Anxa1/Fam76b/Ido1/Map3k8/Ccn4/Tlr9/Hgf/Mapk13/Ace2/Rhbdf2/Agt/H2-T23/Sphk1/Tlr4/Igf1/Il1r1/Aim2/Nod2/Wnt5a/Casp1/Htr2a/Macir/Sbno2/Nfkbia/Il17ra/Fanca/Stap1/Creb3l3/Stat5a/Rora/Tnfrsf1a/Lbp/Lacc1/Il1rl2/Wfdc1/Ptger4/Nlrc3/Otulin/Klf4/Ptprc/Nt5e/Gpx1/Mmp9/Foxp1/Ptges/Smpdl3…
GOBP_BINDING_OF_SPERM_TO_ZONA_PELLUCIDA	GOBP_BINDING_OF_SPERM_TO_ZONA_PELLUCIDA	GOBP_BINDING_OF_SPERM_TO_ZONA_PELLUCIDA	20	0.695405	1.82747	0.000672263	0.0409307	0.0383674	1580	tags=30%, list=10%, signal=27%	Acr/Ovgp1/Aldoa/Zan/Zpbp/Pcsk4
GOCC_DENSE_CORE_GRANULE	GOCC_DENSE_CORE_GRANULE	GOCC_DENSE_CORE_GRANULE	44	-0.569326	-1.86181	0.000680416	0.0411904	0.0386108	2907	tags=34%, list=18%, signal=28%	Ecrg4/Calca/Pdyn/Chga/Syt9/Crh/Penk/Vps13c/Adam8/Tac1/Slc6a9/Npff/Baiap3/Avp/Oxt
GOBP_CATECHOLAMINE_SECRETION	GOBP_CATECHOLAMINE_SECRETION	GOBP_CATECHOLAMINE_SECRETION	39	-0.59339	-1.90201	0.000689409	0.0414977	0.0388988	566	tags=18%, list=3%, signal=17%	Sncg/Slc18a2/Npy2r/Cartpt/Adra2b/Oxt/Drd3
GOCC_AXON	GOCC_AXON	GOCC_AXON	614	-0.291701	-1.35344	0.000695805	0.0416461	0.0390379	3694	tags=25%, list=23%, signal=20%	Arpc3/Exoc3/Map3k12/Uchl1/Stmn2/Kif3a/Stmn3/Slc8a1/Aqp1/Elk1/Mt3/Nrcam/Atp2b3/Scgn/Gldn/Lrrc4b/Rangap1/Clasp2/Hdac6/Calm3/Slc4a8/Cpt1c/Crmp1/Kcna3/Bcar1/Fgf13/Cbarp/Nefh/Hcn2/Dbn1/Map1b/Eps8/Llgl1/Mbp/Adam11/Uhmk1/Oprm1/Thy1/Hcn4/Arhgap4/Pard3/Cdh8/Dscaml1/Slc8a2/Calca/Ntng2/Pdyn/Nefm/Cad/Atp1a3/Hpca/Nfib/Atat1/Nefl/Pnoc/Cldn11/Ap3b2/Stat1/Tmem108/Lrrc7/Hap1/Tubb4a/Gad2/Tpx2/Adnp/Bloc1s5/Fkbp4/Cr…
GOBP_RESPONSE_TO_COCAINE	GOBP_RESPONSE_TO_COCAINE	GOBP_RESPONSE_TO_COCAINE	43	-0.581093	-1.89116	0.000747698	0.044252	0.0414807	2458	tags=30%, list=15%, signal=26%	Hdac5/Cacng4/Fosb/Crh/Oprk1/Snca/St8sia2/Gria1/Gprin3/Drd5/Tacr3/Oxt/Drd3
GOMF_IMMUNE_RECEPTOR_ACTIVITY	GOMF_IMMUNE_RECEPTOR_ACTIVITY	GOMF_IMMUNE_RECEPTOR_ACTIVITY	72	0.517113	1.74767	0.000744652	0.044252	0.0414807	1893	tags=35%, list=12%, signal=31%	Ackr2/Cd4/H2-Aa/Cd74/H2-Ab1/Osmr/Il7r/Fcer2a/Il4ra/Il12rb1/C5ar1/Il6ra/C5ar2/Fcgr2b/H2-Eb1/Cd160/Lepr/Il1rapl2/Il1r1/F3/Gfra2/Il17ra/C3ar1/Epor/Il1rl2
GOCC_NEURONAL_DENSE_CORE_VESICLE	GOCC_NEURONAL_DENSE_CORE_VESICLE	GOCC_NEURONAL_DENSE_CORE_VESICLE	30	-0.620246	-1.86979	0.00075695	0.0444166	0.0416349	2772	tags=30%, list=17%, signal=25%	Calca/Pdyn/Chga/Crh/Penk/Tac1/Npff/Avp/Oxt
HP_NEUROINFLAMMATION	HP_NEUROINFLAMMATION	HP_NEUROINFLAMMATION	17	0.732541	1.85259	0.000758865	0.0444166	0.0416349	2384	tags=59%, list=15%, signal=50%	Fas/Tlr7/H2-Eb1/Tlr4/H2-D1/Nod2/C4b/Prorp/Lacc1/Tk2
GOBP_POSITIVE_REGULATION_OF_CYTOSOLIC_CALCIUM_ION_CONCENTRATION	GOBP_POSITIVE_REGULATION_OF_CYTOSOLIC_CALCIUM_ION_CONCENTRATION	GOBP_POSITIVE_REGULATION_OF_CYTOSOLIC_CALCIUM_ION_CONCENTRATION	115	-0.432617	-1.63812	0.000768583	0.0447383	0.0419364	1566	tags=23%, list=10%, signal=21%	Cx3cr1/Ackr3/Gpr35/Cd55/Cd38/Esr1/Adra1d/Trpc6/Cd24a/Nos1/Tac1/Ednrb/Npff/Trpc5/Lpar1/Cxcr4/Npy2r/Plcz1/Galr1/Cd36/Avpr1a/Prok2/Glp1r/Avp/Calcr/Oxt
GOBP_REGULATION_OF_REACTIVE_OXYGEN_SPECIES_METABOLIC_PROCESS	GOBP_REGULATION_OF_REACTIVE_OXYGEN_SPECIES_METABOLIC_PROCESS	GOBP_REGULATION_OF_REACTIVE_OXYGEN_SPECIES_METABOLIC_PROCESS	113	0.452781	1.6559	0.000797538	0.04617	0.0432785	1346	tags=17%, list=8%, signal=16%	Lcn2/Bst1/Cdkn1a/Alox5/Ier3/Fas/Noxo1/Cyp1b1/Akr1c18/Adcy10/Fbln5/Ace2/Agt/Prkn/Tlr4/Thbs1/Pink1/Rac2/Tgfbr2
HP_DECREASED_FERTILITY_IN_MALES	HP_DECREASED_FERTILITY_IN_MALES	HP_DECREASED_FERTILITY_IN_MALES	155	-0.397908	-1.58389	0.000824137	0.0474506	0.0444789	929	tags=19%, list=6%, signal=18%	Dnah2/Cfap61/Mns1/Odad3/Dnah9/Cldn2/Odad1/Dnah1/Ccdc40/Cfap47/Cfap43/Cfap52/Dnah5/Lhcgr/Plcz1/Spef2/Rsph1/Stk33/Ttc21a/Tsga10/Dnaaf3/Zmynd10/Foxj1/Lrrc23/Strc/Ccdc146/Dnah11/Hydin/Dnali1/Ak7
HP_ANOSMIA	HP_ANOSMIA	HP_ANOSMIA	42	-0.553982	-1.79722	0.000833651	0.0474823	0.0445086	3518	tags=55%, list=21%, signal=43%	Slc39a14/Nsmf/Dnai1/Dusp6/Ndnf/Il17rd/Chd7/Spry4/Fgfr1/Otx2/Shh/Fgfr2/Adcy3/Sox10/Dcc/Nhlh2/Gnrh1/Sox3/Fgf10/Sema3e/Tacr3/Prokr2/Prok2
GOBP_SIGNAL_RELEASE	GOBP_SIGNAL_RELEASE	GOBP_SIGNAL_RELEASE	417	-0.311684	-1.39499	0.000832906	0.0474823	0.0445086	2024	tags=16%, list=12%, signal=14%	Edn3/Vgf/Lin7b/Oxct1/Fgfr1/Slc25a22/Syngr3/Adcy8/Mafa/Sncaip/Adcy5/Adora2a/Foxo1/Grm4/Rph3al/Prkcg/Syk/Epha5/Ngf/Oprk1/Unc13a/Orai1/Rfx3/Ppfia2/Snca/Mcu/Ndufaf2/Neurod1/Dynll1/Adam8/Ltbp4/Slc32a1/Cd38/Pfkl/Trh/Pck2/Wnt7a/Ano1/Tac1/Apln/Ednrb/Slc6a9/Npff/Grp/Inhba/Sv2c/Sncg/Slc18a2/Fer1l5/Nnat/Npy2r/Doc2b/Galr1/Baiap3/Gdf9/Myb/Sytl4/Cartpt/Adra2b/Slc18a3/Glp1r/Isl1/Cckar/Gal/Oxt/Drd3
HP_WHEEZING	HP_WHEEZING	HP_WHEEZING	50	-0.546621	-1.84445	0.000841703	0.0476845	0.0446982	1500	tags=38%, list=9%, signal=35%	Dnai2/Rsph4a/Odad4/Nos1/Odad3/Dnah9/Odad1/Dnah1/Ccdc40/Dnah5/Spef2/Rsph1/Crlf1/Dnaaf3/Zmynd10/Foxj1/Dnah11/Hydin/Nkx2-1
GOBP_MODULATION_BY_SYMBIONT_OF_ENTRY_INTO_HOST	GOBP_MODULATION_BY_SYMBIONT_OF_ENTRY_INTO_HOST	GOBP_MODULATION_BY_SYMBIONT_OF_ENTRY_INTO_HOST	24	0.679556	1.87154	0.000871967	0.0491362	0.046059	1831	tags=29%, list=11%, signal=26%	Ch25h/Cd4/Cd74/H2-Eb1/Trim5/Hs3st5/Itgav
GOBP_REGULATION_OF_NEUTROPHIL_CHEMOTAXIS	GOBP_REGULATION_OF_NEUTROPHIL_CHEMOTAXIS	GOBP_REGULATION_OF_NEUTROPHIL_CHEMOTAXIS	26	0.663833	1.83253	0.000879937	0.049323	0.0462341	1756	tags=42%, list=11%, signal=38%	Bst1/Edn1/Cd74/Dapk2/C5ar1/Perp/C5ar2/Dpp4/Rac2/C3ar1/Lbp
HP_APLASIA_HYPOPLASIA_OF_THE_THYROID_GLAND	HP_APLASIA_HYPOPLASIA_OF_THE_THYROID_GLAND	HP_APLASIA_HYPOPLASIA_OF_THE_THYROID_GLAND	15	-0.754132	-1.91713	0.000889439	0.0493336	0.046244	2352	tags=47%, list=14%, signal=40%	Tshb/Nsdhl/Slc26a4/Adamtsl1/Trhr/Irs4/Nkx2-1
HP_ABNORMAL_HYPOTHALAMUS_PHYSIOLOGY	HP_ABNORMAL_HYPOTHALAMUS_PHYSIOLOGY	HP_ABNORMAL_HYPOTHALAMUS_PHYSIOLOGY	42	-0.552579	-1.79266	0.000886082	0.0493336	0.046244	3649	tags=43%, list=22%, signal=33%	Smo/Dll1/Disp1/Dusp6/Ndnf/Il17rd/Chd7/Spry4/Fgfr1/Shh/Tert/Sox10/Dcc/Trh/Magel2/Tacr3/Prokr2/Prok2
