# Supplementary material
Source: Research Square preprint supplement (doi:10.21203/rs.3.rs-9288348/v1)
Supplement: Supplementary file 6 [file e10b90f1805f203ad8633228.xlsx]

## Sheet: Table S1
Table S1. Enriched pathways of differentially expressed genes (DEGs) in the hippocampus of BDL mice (n = 5) versus sham mice (n = 5) via Metascape
Category	CategoryID	GO	Description	PARENT_GO	LogP	Enrichment	Z-score	#TotalGeneInLibrary	#GeneInGO	#GeneInHitList	#GeneInGOAndHitList	%InGO	STDV %InGO	GeneID	Hits	Log(q-value)	GeneList
Reactome Gene Sets	6	R-MMU-382551	Transport of small molecules		-5.1	2.8	5.3	21222	641	270	23	8.5	1.7	11815|11829|12870|14412|16816|16819|18830|20393|20533|22042|27411|52466|53881|57875|76295|102680|108115|170755|225997|231287|243328|100503605|101488143	Apod|Aqp4|Cp|Slc6a13|Lcat|Lcn2|Pltp|Sgk1|Slc4a1|Tfrc|Slc14a2|Slc46a1|Slc5a3|Angptl4|Atp11b|Slc6a20a|Slco4a1|Sgk3|Trpm6|Atp10d|Slc29a4|Hbb-bs|Hbb-bt	-1.5	MyList
GO Biological Processes	19	GO:0008285	negative regulation of cell population proliferation	19_GO:0048519 negative regulation of biological process	-3.2	2.2	3.8	21222	750	270	21	7.8	1.6	11689|11815|12575|13078|14102|14419|14561|14623|14960|15223|16476|18053|18095|19215|22353|22410|58801|60599|68888|68949|107586	Alox5|Apod|Cdkn1a|Cyp1b1|Fas|Gal|Gdf11|Gjb6|H2-Aa|Foxj1|Jun|Ngfr|Nkx3-1|Ptgds|Vip|Wnt10b|Pmaip1|Trp53inp1|Gkn3|Zfas1|Ovol2	-0.51	MyList
GO Cellular Components	20	GO:0031012	extracellular matrix		-5.5	3.3	5.8	21222	474	270	20	7.4	1.6	11492|11745|12406|12815|12831|12834|14264|16425|16855|17313|17388|21817|21826|22371|29817|57875|75426|96875|107250|116847	Adam19|Anxa3|Serpinh1|Col11a2|Col5a1|Col6a2|Fmod|Itih2|Lgals4|Mgp|Mmp15|Tgm2|Thbs2|Vwf|Igfbp7|Angptl4|Igfbpl1|Prg4|Kazald1|Prelp	-1.7	MyList
GO Cellular Components	20	GO:0030312	external encapsulating structure		-5.5	3.3	5.8	21222	476	270	20	7.4	1.6	11492|11745|12406|12815|12831|12834|14264|16425|16855|17313|17388|21817|21826|22371|29817|57875|75426|96875|107250|116847	Adam19|Anxa3|Serpinh1|Col11a2|Col5a1|Col6a2|Fmod|Itih2|Lgals4|Mgp|Mmp15|Tgm2|Thbs2|Vwf|Igfbp7|Angptl4|Igfbpl1|Prg4|Kazald1|Prelp	-1.7	MyList
GO Biological Processes	19	GO:0007267	cell-cell signaling	19_GO:0050789 regulation of biological process	-2.9	2.1	3.6	21222	734	270	20	7.4	1.6	11443|12490|13447|13490|13614|14131|14181|14395|14409|14623|14652|15562|17067|20264|21817|22353|22409|22410|118454|243312	Chrnb1|Cd34|Doc2b|Drd3|Edn1|Fcgr3|Fgfbp1|Gabra2|Gabrr2|Gjb6|Glp1r|Htr4|Ly6c1|Scn10a|Tgm2|Vip|Wnt10a|Wnt10b|Gjc2|Elfn1	-0.38	MyList
GO Biological Processes	19	GO:0043068	positive regulation of programmed cell death	19_GO:0048518 positive regulation of biological process	-3	2.2	3.6	21222	676	270	19	7	1.6	11684|12575|13078|14102|14419|16476|16819|18053|18095|18124|21817|21973|22410|56338|58801|60599|64058|68949|107449	Alox12|Cdkn1a|Cyp1b1|Fas|Gal|Jun|Lcn2|Ngfr|Nkx3-1|Nr4a3|Tgm2|Top2a|Wnt10b|Txnip|Pmaip1|Trp53inp1|Perp|Zfas1|Unc5b	-0.39	MyList
GO Molecular Functions	21	GO:0140678	molecular function inhibitor activity		-2.9	2.2	3.6	21222	633	270	18	6.7	1.5	11745|12406|12575|12702|14433|16425|17067|18095|20725|56338|57875|66259|68082|68949|71101|209268|243312|328971	Anxa3|Serpinh1|Cdkn1a|Socs3|Gapdh|Itih2|Ly6c1|Nkx3-1|Serpinb8|Txnip|Angptl4|Camk2n1|Dusp19|Zfas1|Uvssa|Igsf1|Elfn1|Spink10	-0.36	MyList
GO Molecular Functions	21	GO:0015075	monoatomic ion transmembrane transporter activity		-2.2	1.9	2.9	21222	735	270	18	6.7	1.5	11443|12789|14395|14409|14411|14412|15168|20264|20533|22042|52466|53881|76905|102680|224661|225997|227632|243328	Chrnb1|Cnga2|Gabra2|Gabrr2|Slc6a12|Slc6a13|Hcn3|Scn10a|Slc4a1|Tfrc|Slc46a1|Slc5a3|Lrg1|Slc6a20a|Slc26a8|Trpm6|Kcnt1|Slc29a4	-0.079	MyList
GO Biological Processes	19	GO:0043065	positive regulation of apoptotic process	19_GO:0048518 positive regulation of biological process	-2.7	2.1	3.4	21222	659	270	18	6.7	1.5	11684|13078|14102|14419|16476|16819|18053|18095|18124|21817|21973|22410|56338|58801|60599|64058|68949|107449	Alox12|Cyp1b1|Fas|Gal|Jun|Lcn2|Ngfr|Nkx3-1|Nr4a3|Tgm2|Top2a|Wnt10b|Txnip|Pmaip1|Trp53inp1|Perp|Zfas1|Unc5b	-0.28	MyList
GO Biological Processes	19	GO:0044057	regulation of system process	19_GO:0032501 multicellular organismal process	-2.6	2.1	3.3	21222	676	270	18	6.7	1.5	11486|11689|12952|13614|13731|14419|14652|15894|18053|18095|18124|18429|20264|20750|21956|50501|74318|433809	Ada|Alox5|Cry1|Edn1|Emp2|Gal|Glp1r|Icam1|Ngfr|Nkx3-1|Nr4a3|Oxt|Scn10a|Spp1|Tnnt2|Prok2|Hopx|Rnf207	-0.22	MyList
GO Cellular Components	20	GO:0009897	external side of plasma membrane		-3.7	2.6	4.3	21222	541	270	18	6.7	1.5	11486|11829|12475|12490|12628|14102|14131|14960|15894|16190|16194|17067|18053|18414|22042|22371|59289|80891	Ada|Aqp4|Cd14|Cd34|Cfh|Fas|Fcgr3|H2-Aa|Icam1|Il4ra|Il6ra|Ly6c1|Ngfr|Osmr|Tfrc|Vwf|Ackr2|Fcrl2	-0.71	MyList
GO Cellular Components	20	GO:0045177	apical part of cell		-2.7	2.1	3.4	21222	659	270	18	6.7	1.5	12490|13490|13731|14102|14623|16194|18414|20750|27411|52466|53881|54562|56485|102680|225997|237636|243328|545902	Cd34|Drd3|Emp2|Fas|Gjb6|Il6ra|Osmr|Spp1|Slc14a2|Slc46a1|Slc5a3|Dnaaf11|Slc2a5|Slc6a20a|Trpm6|Npc1l1|Slc29a4|Ptprh	-0.28	MyList
GO Biological Processes	19	GO:0046903	secretion	19_GO:0051179 localization	-2.7	2.2	3.4	21222	610	270	17	6.3	1.5	11486|11745|11829|13447|13490|13614|14131|14652|15562|18124|19215|21817|22353|22436|83671|101613|237625	Ada|Anxa3|Aqp4|Doc2b|Drd3|Edn1|Fcgr3|Glp1r|Htr4|Nr4a3|Ptgds|Tgm2|Vip|Xdh|Sytl2|Nlrp6|Pla2g3	-0.26	MyList
GO Biological Processes	19	GO:0055082	intracellular chemical homeostasis	19_GO:0042592 homeostatic process	-2.5	2.1	3.3	21222	628	270	17	6.3	1.5	11656|11829|12870|13490|13614|14411|14623|15894|18053|20393|20533|20750|21817|22042|53417|66853|212032	Alas2|Aqp4|Cp|Drd3|Edn1|Slc6a12|Gjb6|Icam1|Ngfr|Sgk1|Slc4a1|Spp1|Tgm2|Tfrc|Hif3a|Pnpla2|Hk3	-0.2	MyList
GO Molecular Functions	21	GO:0015318	inorganic molecular entity transmembrane transporter activity		-2.1	1.9	2.8	21222	696	270	17	6.3	1.5	11829|12789|14395|14409|14411|14412|15168|20264|20533|22042|52466|53881|76905|102680|224661|225997|227632	Aqp4|Cnga2|Gabra2|Gabrr2|Slc6a12|Slc6a13|Hcn3|Scn10a|Slc4a1|Tfrc|Slc46a1|Slc5a3|Lrg1|Slc6a20a|Slc26a8|Trpm6|Kcnt1	-0.032	MyList
GO Biological Processes	19	GO:0007507	heart development	19_GO:0032502 developmental process	-2.3	2	3	21222	667	270	17	6.3	1.5	11492|12575|12831|13614|13731|13813|15223|16476|18095|18186|18429|21956|50501|68760|74318|107586|225288	Adam19|Cdkn1a|Col5a1|Edn1|Emp2|Eomes|Foxj1|Jun|Nkx3-1|Nrp1|Oxt|Tnnt2|Prok2|Synpo2l|Hopx|Ovol2|Fhod3	-0.11	MyList
GO Biological Processes	19	GO:1901699	cellular response to nitrogen compound	19_GO:0050896 response to stimulus	-2.1	1.9	2.8	21222	697	270	17	6.3	1.5	11443|13490|13614|14652|15168|15360|15562|15894|16476|16819|17067|18053|18124|20393|21817|22410|93896	Chrnb1|Drd3|Edn1|Glp1r|Hcn3|Hmgcs2|Htr4|Icam1|Jun|Lcn2|Ly6c1|Ngfr|Nr4a3|Sgk1|Tgm2|Wnt10b|Glp2r	-0.028	MyList
GO Biological Processes	19	GO:0048545	response to steroid hormone	19_GO:0050896 response to stimulus	-5.9	4.3	6.5	21222	292	270	16	5.9	1.4	11434|13614|14102|15360|16476|16816|18095|18429|18600|19215|20393|20750|20887|56338|71760|268709	Acr|Edn1|Fas|Hmgcs2|Jun|Lcat|Nkx3-1|Oxt|Padi2|Ptgds|Sgk1|Spp1|Sult1a1|Txnip|Etnppl|Fam107a	-1.9	MyList
GO Biological Processes	19	GO:0045785	positive regulation of cell adhesion	19_GO:0048518 positive regulation of biological process	-2.8	2.4	3.6	21222	535	270	16	5.9	1.4	11486|11492|11689|13731|14960|15505|15894|16190|16194|18124|18186|20533|20750|21817|22042|22410	Ada|Adam19|Alox5|Emp2|H2-Aa|Hsph1|Icam1|Il4ra|Il6ra|Nr4a3|Nrp1|Slc4a1|Spp1|Tgm2|Tfrc|Wnt10b	-0.36	MyList
GO Biological Processes	19	GO:0002252	immune effector process	19_GO:0002376 immune system process	-2.6	2.2	3.4	21222	562	270	16	5.9	1.4	11486|11745|12628|13731|13813|14102|14131|15894|16190|16194|18124|19215|50908|50909|101613|237625	Ada|Anxa3|Cfh|Emp2|Eomes|Fas|Fcgr3|Icam1|Il4ra|Il6ra|Nr4a3|Ptgds|C1s1|C1ra|Nlrp6|Pla2g3	-0.24	MyList
GO Biological Processes	19	GO:0001568	blood vessel development	19_GO:0032502 developmental process	-2.3	2.1	3.1	21222	604	270	16	5.9	1.4	12490|12628|12702|12831|13078|13614|16476|18053|18095|18186|29817|50501|53417|57875|107449|107586	Cd34|Cfh|Socs3|Col5a1|Cyp1b1|Edn1|Jun|Ngfr|Nkx3-1|Nrp1|Igfbp7|Prok2|Hif3a|Angptl4|Unc5b|Ovol2	-0.13	MyList
GO Biological Processes	19	GO:0001944	vasculature development	19_GO:0032502 developmental process	-2.1	1.9	2.8	21222	646	270	16	5.9	1.4	12490|12628|12702|12831|13078|13614|16476|18053|18095|18186|29817|50501|53417|57875|107449|107586	Cd34|Cfh|Socs3|Col5a1|Cyp1b1|Edn1|Jun|Ngfr|Nkx3-1|Nrp1|Igfbp7|Prok2|Hif3a|Angptl4|Unc5b|Ovol2	-0.023	MyList
GO Cellular Components	20	GO:0016324	apical plasma membrane		-2.7	2.3	3.5	21222	502	270	15	5.6	1.4	12490|13731|14102|14623|16194|18414|27411|52466|53881|56485|102680|225997|237636|243328|545902	Cd34|Emp2|Fas|Gjb6|Il6ra|Osmr|Slc14a2|Slc46a1|Slc5a3|Slc2a5|Slc6a20a|Trpm6|Npc1l1|Slc29a4|Ptprh	-0.28	MyList
Reactome Gene Sets	6	R-MMU-372790	Signaling by GPCR		-2	2	2.7	21222	596	270	15	5.6	1.4	13490|13614|14419|14652|15562|18429|20295|22353|50501|59289|93896|246313|328967|381112|574402	Drd3|Edn1|Gal|Glp1r|Htr4|Oxt|Ccl17|Vip|Prok2|Ackr2|Glp2r|Prokr2|Arhgef37|Arhgef33|Gpr17	-0.016	MyList
GO Biological Processes	19	GO:0050878	regulation of body fluid levels	19_GO:0065007 biological regulation	-4.2	3.3	4.9	21222	361	270	15	5.6	1.4	11486|11684|11686|11829|12628|13614|13731|15562|18429|20533|22371|22436|57875|83671|101613	Ada|Alox12|Alox12b|Aqp4|Cfh|Edn1|Emp2|Htr4|Oxt|Slc4a1|Vwf|Xdh|Angptl4|Sytl2|Nlrp6	-0.92	MyList
GO Cellular Components	20	GO:0045178	basal part of cell		-3.6	3	4.4	21222	365	270	14	5.2	1.3	11829|12490|13614|14411|14412|18301|20533|22042|27411|52466|53881|108115|217258|243328	Aqp4|Cd34|Edn1|Slc6a12|Slc6a13|Fxyd5|Slc4a1|Tfrc|Slc14a2|Slc46a1|Slc5a3|Slco4a1|Abca8a|Slc29a4	-0.66	MyList
GO Biological Processes	19	GO:0008015	blood circulation	19_GO:0032501 multicellular organismal process	-2.4	2.3	3.2	21222	485	270	14	5.2	1.3	11689|12628|12741|13490|13614|13731|14652|15894|15937|18429|21956|56485|66259|68949	Alox5|Cfh|Cldn5|Drd3|Edn1|Emp2|Glp1r|Icam1|Ier3|Oxt|Tnnt2|Slc2a5|Camk2n1|Zfas1	-0.16	MyList
GO Biological Processes	19	GO:0003013	circulatory system process	19_GO:0032501 multicellular organismal process	-2.2	2.1	3	21222	516	270	14	5.2	1.3	11689|12628|12741|13490|13614|13731|14652|15894|15937|18429|21956|56485|66259|68949	Alox5|Cfh|Cldn5|Drd3|Edn1|Emp2|Glp1r|Icam1|Ier3|Oxt|Tnnt2|Slc2a5|Camk2n1|Zfas1	-0.069	MyList
GO Biological Processes	19	GO:0022407	regulation of cell-cell adhesion	19_GO:0050789 regulation of biological process	-2.1	2.1	2.8	21222	530	270	14	5.2	1.3	11486|11492|11684|11689|14960|15223|15505|15894|16190|16194|18124|20533|22042|22410	Ada|Adam19|Alox12|Alox5|H2-Aa|Foxj1|Hsph1|Icam1|Il4ra|Il6ra|Nr4a3|Slc4a1|Tfrc|Wnt10b	-0.027	MyList
GO Biological Processes	19	GO:0043269	regulation of monoatomic ion transport	19_GO:0051179 localization	-2	2	2.8	21222	541	270	14	5.2	1.3	11689|13490|13614|14419|14652|15894|16819|18301|20264|20393|20840|22353|68949|118454	Alox5|Drd3|Edn1|Gal|Glp1r|Icam1|Lcn2|Fxyd5|Scn10a|Sgk1|Stac|Vip|Zfas1|Gjc2	-0.016	MyList
GO Molecular Functions	21	GO:0004857	enzyme inhibitor activity		-2.5	2.3	3.3	21222	471	270	14	5.2	1.3	11745|12406|12575|12702|14433|16425|20725|56338|57875|66259|68082|71101|243312|328971	Anxa3|Serpinh1|Cdkn1a|Socs3|Gapdh|Itih2|Serpinb8|Txnip|Angptl4|Camk2n1|Dusp19|Uvssa|Elfn1|Spink10	-0.2	MyList
Reactome Gene Sets	6	R-MMU-500792	GPCR ligand binding		-2.8	2.6	3.7	21222	391	270	13	4.8	1.3	13490|13614|14419|14652|15562|18429|20295|22353|50501|59289|93896|246313|574402	Drd3|Edn1|Gal|Glp1r|Htr4|Oxt|Ccl17|Vip|Prok2|Ackr2|Glp2r|Prokr2|Gpr17	-0.34	MyList
GO Biological Processes	19	GO:0006869	lipid transport	19_GO:0051179 localization	-3.2	2.9	4.1	21222	355	270	13	4.8	1.3	11815|12140|13490|16816|18830|20533|71760|76295|108115|217258|231287|237625|237636	Apod|Fabp7|Drd3|Lcat|Pltp|Slc4a1|Etnppl|Atp11b|Slco4a1|Abca8a|Atp10d|Pla2g3|Npc1l1	-0.51	MyList
GO Biological Processes	19	GO:0010876	lipid localization	19_GO:0051179 localization	-3.2	2.9	4	21222	356	270	13	4.8	1.3	11815|12140|13490|16816|18830|20533|71760|76295|108115|217258|231287|237625|237636	Apod|Fabp7|Drd3|Lcat|Pltp|Slc4a1|Etnppl|Atp11b|Slco4a1|Abca8a|Atp10d|Pla2g3|Npc1l1	-0.51	MyList
GO Cellular Components	20	GO:0009925	basal plasma membrane		-3.3	3	4.2	21222	343	270	13	4.8	1.3	11829|12490|14411|14412|18301|20533|22042|27411|52466|53881|108115|217258|243328	Aqp4|Cd34|Slc6a12|Slc6a13|Fxyd5|Slc4a1|Tfrc|Slc14a2|Slc46a1|Slc5a3|Slco4a1|Abca8a|Slc29a4	-0.56	MyList
GO Biological Processes	19	GO:0002443	leukocyte mediated immunity	19_GO:0002376 immune system process	-2.8	2.6	3.7	21222	386	270	13	4.8	1.3	11745|12628|13731|14102|14131|15894|16190|18124|19215|50908|50909|101613|237625	Anxa3|Cfh|Emp2|Fas|Fcgr3|Icam1|Il4ra|Nr4a3|Ptgds|C1s1|C1ra|Nlrp6|Pla2g3	-0.36	MyList
GO Biological Processes	19	GO:0015711	organic anion transport	19_GO:0051179 localization	-2.5	2.4	3.4	21222	419	270	13	4.8	1.3	12140|13490|14411|14412|14580|20533|52466|56485|102680|108115|224661|228993|237625	Fabp7|Drd3|Slc6a12|Slc6a13|Gfap|Slc4a1|Slc46a1|Slc2a5|Slc6a20a|Slco4a1|Slc26a8|Slc17a9|Pla2g3	-0.21	MyList
GO Biological Processes	19	GO:0032102	negative regulation of response to external stimulus	19_GO:0048519 negative regulation of biological process	-2.4	2.3	3.2	21222	435	270	13	4.8	1.3	11486|11684|11689|12140|12702|13024|13490|15937|18186|18600|18846|101613|574402	Ada|Alox12|Alox5|Fabp7|Socs3|Ctla2a|Drd3|Ier3|Nrp1|Padi2|Plxna3|Nlrp6|Gpr17	-0.16	MyList
GO Biological Processes	19	GO:2001233	regulation of apoptotic signaling pathway	19_GO:0050896 response to stimulus	-2.3	2.3	3.2	21222	443	270	13	4.8	1.3	11684|14049|14102|15894|15937|16476|18053|18095|18186|58801|68949|107449|170755	Alox12|Eya2|Fas|Icam1|Ier3|Jun|Ngfr|Nkx3-1|Nrp1|Pmaip1|Zfas1|Unc5b|Sgk3	-0.13	MyList
GO Biological Processes	19	GO:0009611	response to wounding	19_GO:0050896 response to stimulus	-2.1	2.2	2.9	21222	472	270	13	4.8	1.3	11815|12490|12575|12628|12831|16476|18186|20533|22371|57875|76905|101613|100534273	Apod|Cd34|Cdkn1a|Cfh|Col5a1|Jun|Nrp1|Slc4a1|Vwf|Angptl4|Lrg1|Nlrp6|Fer1l5	-0.043	MyList
GO Cellular Components	20	GO:0016323	basolateral plasma membrane		-3.2	3.1	4.1	21222	309	270	12	4.4	1.3	11829|14411|14412|18301|20533|22042|27411|52466|53881|108115|217258|243328	Aqp4|Slc6a12|Slc6a13|Fxyd5|Slc4a1|Tfrc|Slc14a2|Slc46a1|Slc5a3|Slco4a1|Abca8a|Slc29a4	-0.51	MyList
KEGG Pathway	24	mmu04080	Neuroactive ligand-receptor interaction - Mus musculus (house mouse)		-2.3	2.4	3.2	21222	392	270	12	4.4	1.3	11443|13490|13614|14395|14409|14419|14652|14765|15562|18429|22353|93896	Chrnb1|Drd3|Edn1|Gabra2|Gabrr2|Gal|Glp1r|Gpr50|Htr4|Oxt|Vip|Glp2r	-0.13	MyList
GO Biological Processes	19	GO:0022409	positive regulation of cell-cell adhesion	19_GO:0048518 positive regulation of biological process	-2.9	2.8	3.8	21222	338	270	12	4.4	1.3	11486|11492|11689|14960|15505|15894|16190|16194|18124|20533|22042|22410	Ada|Adam19|Alox5|H2-Aa|Hsph1|Icam1|Il4ra|Il6ra|Nr4a3|Slc4a1|Tfrc|Wnt10b	-0.36	MyList
GO Biological Processes	19	GO:0001525	angiogenesis	19_GO:0032502 developmental process	-2.5	2.5	3.4	21222	371	270	12	4.4	1.3	12490|12628|13078|13614|16476|18186|29817|50501|53417|57875|107449|107586	Cd34|Cfh|Cyp1b1|Edn1|Jun|Nrp1|Igfbp7|Prok2|Hif3a|Angptl4|Unc5b|Ovol2	-0.2	MyList
GO Biological Processes	19	GO:0010038	response to metal ion	19_GO:0050896 response to stimulus	-2.5	2.5	3.3	21222	377	270	12	4.4	1.3	12475|12870|13614|14102|15360|16476|16816|16819|21956|22042|22436|56338	Cd14|Cp|Edn1|Fas|Hmgcs2|Jun|Lcat|Lcn2|Tnnt2|Tfrc|Xdh|Txnip	-0.19	MyList
GO Molecular Functions	21	GO:0001664	G protein-coupled receptor binding		-2.9	2.8	3.8	21222	337	270	12	4.4	1.3	13490|13614|14419|15122|18429|20295|22353|22409|22410|50501|110257|239766	Drd3|Edn1|Gal|Hba-a1|Oxt|Ccl17|Vip|Wnt10a|Wnt10b|Prok2|Hba-a2|Rtp1	-0.36	MyList
GO Biological Processes	19	GO:0070482	response to oxygen levels	19_GO:0050896 response to stimulus	-2.1	2.2	2.9	21222	424	270	12	4.4	1.3	11486|11656|12628|13614|14102|16476|16819|18095|20533|22042|53417|57875	Ada|Alas2|Cfh|Edn1|Fas|Jun|Lcn2|Nkx3-1|Slc4a1|Tfrc|Hif3a|Angptl4	-0.027	MyList
GO Biological Processes	19	GO:0043523	regulation of neuron apoptotic process	19_GO:0050789 regulation of biological process	-2.9	2.8	3.8	21222	336	270	12	4.4	1.3	14102|14652|15505|16476|16819|18053|18124|18186|58801|105827|107449|237625	Fas|Glp1r|Hsph1|Jun|Lcn2|Ngfr|Nr4a3|Nrp1|Pmaip1|Amigo2|Unc5b|Pla2g3	-0.36	MyList
KEGG Pathway	24	mmu04151	PI3K-Akt signaling pathway - Mus musculus (house mouse)		-2.1	2.3	3	21222	368	270	11	4.1	1.2	12575|12834|16190|16194|18053|18414|20393|20750|21826|22371|170755	Cdkn1a|Col6a2|Il4ra|Il6ra|Ngfr|Osmr|Sgk1|Spp1|Thbs2|Vwf|Sgk3	-0.042	MyList
GO Biological Processes	19	GO:0042060	wound healing	19_GO:0050896 response to stimulus	-2.8	2.9	3.8	21222	296	270	11	4.1	1.2	12490|12575|12628|12831|18186|20533|22371|57875|76905|101613|100534273	Cd34|Cdkn1a|Cfh|Col5a1|Nrp1|Slc4a1|Vwf|Angptl4|Lrg1|Nlrp6|Fer1l5	-0.35	MyList
GO Biological Processes	19	GO:0015849	organic acid transport	19_GO:0051179 localization	-2.6	2.7	3.5	21222	316	270	11	4.1	1.2	12140|13490|14411|14412|14580|52466|102680|108115|224661|237625|243328	Fabp7|Drd3|Slc6a12|Slc6a13|Gfap|Slc46a1|Slc6a20a|Slco4a1|Slc26a8|Pla2g3|Slc29a4	-0.23	MyList
GO Biological Processes	19	GO:0045765	regulation of angiogenesis	19_GO:0032502 developmental process	-2.6	2.7	3.5	21222	320	270	11	4.1	1.2	11689|11745|12490|12741|13078|13731|18053|18186|21817|21826|76905	Alox5|Anxa3|Cd34|Cldn5|Cyp1b1|Emp2|Ngfr|Nrp1|Tgm2|Thbs2|Lrg1	-0.22	MyList
GO Biological Processes	19	GO:1901342	regulation of vasculature development	19_GO:0032502 developmental process	-2.5	2.6	3.4	21222	327	270	11	4.1	1.2	11689|11745|12490|12741|13078|13731|18053|18186|21817|21826|76905	Alox5|Anxa3|Cd34|Cldn5|Cyp1b1|Emp2|Ngfr|Nrp1|Tgm2|Thbs2|Lrg1	-0.19	MyList
GO Biological Processes	19	GO:0006935	chemotaxis	19_GO:0040011 locomotion	-2.3	2.5	3.2	21222	346	270	11	4.1	1.2	11689|12642|14131|16985|18186|18846|20295|20750|50501|59289|67272	Alox5|Ch25h|Fcgr3|Lsp1|Nrp1|Plxna3|Ccl17|Spp1|Prok2|Ackr2|Cmtm5	-0.13	MyList
GO Biological Processes	19	GO:0042330	taxis	19_GO:0040011 locomotion	-2.3	2.5	3.2	21222	348	270	11	4.1	1.2	11689|12642|14131|16985|18186|18846|20295|20750|50501|59289|67272	Alox5|Ch25h|Fcgr3|Lsp1|Nrp1|Plxna3|Ccl17|Spp1|Prok2|Ackr2|Cmtm5	-0.12	MyList
GO Biological Processes	19	GO:0009416	response to light stimulus	19_GO:0050896 response to stimulus	-2.2	2.4	3.1	21222	355	270	11	4.1	1.2	12575|12696|12834|12952|13490|16819|20393|58801|60599|66853|71101	Cdkn1a|Cirbp|Col6a2|Cry1|Drd3|Lcn2|Sgk1|Pmaip1|Trp53inp1|Pnpla2|Uvssa	-0.098	MyList
Reactome Gene Sets	6	R-MMU-373076	Class A/1 (Rhodopsin-like receptors)		-2.2	2.6	3.2	21222	304	270	10	3.7	1.1	13490|13614|14419|15562|18429|20295|50501|59289|246313|574402	Drd3|Edn1|Gal|Htr4|Oxt|Ccl17|Prok2|Ackr2|Prokr2|Gpr17	-0.11	MyList
GO Biological Processes	19	GO:0031960	response to corticosteroid	19_GO:0050896 response to stimulus	-4	4.5	5.2	21222	176	270	10	3.7	1.1	13614|14102|15360|16816|18429|19215|20393|20887|71760|268709	Edn1|Fas|Hmgcs2|Lcat|Oxt|Ptgds|Sgk1|Sult1a1|Etnppl|Fam107a	-0.82	MyList
GO Biological Processes	19	GO:1905952	regulation of lipid localization	19_GO:0051179 localization	-3.8	4.2	5	21222	186	270	10	3.7	1.1	12952|13614|14419|18095|18429|18830|20750|66853|217258|237625	Cry1|Edn1|Gal|Nkx3-1|Oxt|Pltp|Spp1|Pnpla2|Abca8a|Pla2g3	-0.75	MyList
GO Biological Processes	19	GO:0009743	response to carbohydrate	19_GO:0050896 response to stimulus	-3.6	3.9	4.7	21222	202	270	10	3.7	1.1	11829|12834|14623|14652|15360|15894|16819|18429|56338|56485	Aqp4|Col6a2|Gjb6|Glp1r|Hmgcs2|Icam1|Lcn2|Oxt|Txnip|Slc2a5	-0.66	MyList
GO Biological Processes	19	GO:0006814	sodium ion transport	19_GO:0051179 localization	-3.3	3.7	4.4	21222	215	270	10	3.7	1.1	12789|13614|14411|14412|15168|18301|20264|20393|53881|102680	Cnga2|Edn1|Slc6a12|Slc6a13|Hcn3|Fxyd5|Scn10a|Sgk1|Slc5a3|Slc6a20a	-0.58	MyList
GO Biological Processes	19	GO:0043524	negative regulation of neuron apoptotic process	19_GO:0048519 negative regulation of biological process	-3.2	3.5	4.3	21222	224	270	10	3.7	1.1	14652|15505|16476|16819|18053|18124|18186|105827|107449|237625	Glp1r|Hsph1|Jun|Lcn2|Ngfr|Nr4a3|Nrp1|Amigo2|Unc5b|Pla2g3	-0.51	MyList
GO Biological Processes	19	GO:1903522	regulation of blood circulation	19_GO:0032501 multicellular organismal process	-2.5	2.8	3.4	21222	281	270	10	3.7	1.1	11486|11689|13614|14652|15894|18429|20264|21956|74318|433809	Ada|Alox5|Edn1|Glp1r|Icam1|Oxt|Scn10a|Tnnt2|Hopx|Rnf207	-0.19	MyList
GO Biological Processes	19	GO:1903039	positive regulation of leukocyte cell-cell adhesion	19_GO:0048518 positive regulation of biological process	-2.5	2.8	3.4	21222	282	270	10	3.7	1.1	11486|11689|14960|15505|15894|16190|18124|20533|22042|22410	Ada|Alox5|H2-Aa|Hsph1|Icam1|Il4ra|Nr4a3|Slc4a1|Tfrc|Wnt10b	-0.19	MyList
GO Biological Processes	19	GO:0046942	carboxylic acid transport	19_GO:0051179 localization	-2.1	2.5	3	21222	315	270	10	3.7	1.1	12140|13490|14411|14412|14580|52466|102680|108115|224661|237625	Fabp7|Drd3|Slc6a12|Slc6a13|Gfap|Slc46a1|Slc6a20a|Slco4a1|Slc26a8|Pla2g3	-0.044	MyList
GO Biological Processes	19	GO:0097305	response to alcohol	19_GO:0050896 response to stimulus	-2	2.4	2.9	21222	330	270	10	3.7	1.1	12475|12741|13490|14229|14419|15360|16476|18429|20393|60599	Cd14|Cldn5|Drd3|Fkbp5|Gal|Hmgcs2|Jun|Oxt|Sgk1|Trp53inp1	-0.016	MyList
Reactome Gene Sets	6	R-MMU-425407	SLC-mediated transmembrane transport		-2.6	3.2	3.7	21222	223	270	9	3.3	1.1	11815|12870|14412|20533|27411|53881|102680|108115|243328	Apod|Cp|Slc6a13|Slc4a1|Slc14a2|Slc5a3|Slc6a20a|Slco4a1|Slc29a4	-0.25	MyList
Reactome Gene Sets	6	R-MMU-1474244	Extracellular matrix organization		-2.2	2.7	3.1	21222	264	270	9	3.3	1.1	11492|12406|12815|12831|12834|15894|17388|20750|22371	Adam19|Serpinh1|Col11a2|Col5a1|Col6a2|Icam1|Mmp15|Spp1|Vwf	-0.059	MyList
GO Molecular Functions	21	GO:0019838	growth factor binding		-3.9	4.8	5.3	21222	147	270	9	3.3	1.1	12831|14181|16194|18053|18186|18414|29817|75426|107250	Col5a1|Fgfbp1|Il6ra|Ngfr|Nrp1|Osmr|Igfbp7|Igfbpl1|Kazald1	-0.82	MyList
GO Biological Processes	19	GO:0032368	regulation of lipid transport	19_GO:0051179 localization	-3.8	4.6	5.1	21222	154	270	9	3.3	1.1	12952|13614|14419|18095|18429|18830|20750|217258|237625	Cry1|Edn1|Gal|Nkx3-1|Oxt|Pltp|Spp1|Abca8a|Pla2g3	-0.75	MyList
GO Biological Processes	19	GO:0051384	response to glucocorticoid	19_GO:0050896 response to stimulus	-3.7	4.5	5	21222	158	270	9	3.3	1.1	13614|14102|15360|16816|18429|19215|20887|71760|268709	Edn1|Fas|Hmgcs2|Lcat|Oxt|Ptgds|Sult1a1|Etnppl|Fam107a	-0.72	MyList
GO Biological Processes	19	GO:2000377	regulation of reactive oxygen species metabolic process	19_GO:0050789 regulation of biological process	-3.6	4.3	4.9	21222	163	270	9	3.3	1.1	11684|11689|12575|13078|14102|15937|16819|18053|53881	Alox12|Alox5|Cdkn1a|Cyp1b1|Fas|Ier3|Lcn2|Ngfr|Slc5a3	-0.66	MyList
GO Biological Processes	19	GO:0034284	response to monosaccharide	19_GO:0050896 response to stimulus	-3.4	4	4.6	21222	176	270	9	3.3	1.1	11829|12834|14623|14652|15360|15894|16819|56338|56485	Aqp4|Col6a2|Gjb6|Glp1r|Hmgcs2|Icam1|Lcn2|Txnip|Slc2a5	-0.58	MyList
GO Biological Processes	19	GO:0015850	organic hydroxy compound transport	19_GO:0051179 localization	-3.2	3.8	4.3	21222	187	270	9	3.3	1.1	14131|16816|18830|21817|22353|53881|217258|237636|243328	Fcgr3|Lcat|Pltp|Tgm2|Vip|Slc5a3|Abca8a|Npc1l1|Slc29a4	-0.51	MyList
GO Biological Processes	19	GO:0048660	regulation of smooth muscle cell proliferation	19_GO:0050789 regulation of biological process	-2.9	3.5	4.1	21222	201	270	9	3.3	1.1	11684|11815|12575|13614|16194|16476|18124|21817|22353	Alox12|Apod|Cdkn1a|Edn1|Il6ra|Jun|Nr4a3|Tgm2|Vip	-0.39	MyList
GO Biological Processes	19	GO:0009636	response to toxic substance	19_GO:0050896 response to stimulus	-2.5	3	3.5	21222	235	270	9	3.3	1.1	12870|13078|13614|14102|16819|60599|118454|225997|243328	Cp|Cyp1b1|Edn1|Fas|Lcn2|Trp53inp1|Gjc2|Trpm6|Slc29a4	-0.19	MyList
GO Biological Processes	19	GO:0002366	leukocyte activation involved in immune response	19_GO:0002376 immune system process	-2.4	2.9	3.4	21222	240	270	9	3.3	1.1	11486|11745|13813|15894|16190|16194|18124|19215|237625	Ada|Anxa3|Eomes|Icam1|Il4ra|Il6ra|Nr4a3|Ptgds|Pla2g3	-0.17	MyList
GO Biological Processes	19	GO:0002263	cell activation involved in immune response	19_GO:0002376 immune system process	-2.4	2.9	3.4	21222	244	270	9	3.3	1.1	11486|11745|13813|15894|16190|16194|18124|19215|237625	Ada|Anxa3|Eomes|Icam1|Il4ra|Il6ra|Nr4a3|Ptgds|Pla2g3	-0.15	MyList
GO Biological Processes	19	GO:0050900	leukocyte migration	19_GO:0002376 immune system process	-2.2	2.8	3.2	21222	256	270	9	3.3	1.1	11486|11689|12490|12642|13731|14131|15223|15894|20750	Ada|Alox5|Cd34|Ch25h|Emp2|Fcgr3|Foxj1|Icam1|Spp1	-0.11	MyList
GO Biological Processes	19	GO:0034764	positive regulation of transmembrane transport	19_GO:0051179 localization	-2.1	2.7	3.1	21222	266	270	9	3.3	1.1	11689|13614|14419|16819|18124|18301|20840|118454|100503068	Alox5|Edn1|Gal|Lcn2|Nr4a3|Fxyd5|Stac|Gjc2|Smim43	-0.047	MyList
GO Biological Processes	19	GO:0006959	humoral immune response	19_GO:0002376 immune system process	-2	2.5	2.9	21222	280	270	9	3.3	1.1	11689|12628|14433|15223|16855|20295|22353|50908|50909	Alox5|Cfh|Gapdh|Foxj1|Lgals4|Ccl17|Vip|C1s1|C1ra	-0.016	MyList
GO Biological Processes	19	GO:0003341	cilium movement	19_GO:0009987 cellular process	-2	2.5	2.9	21222	280	270	9	3.3	1.1	11829|18830|54562|75563|78801|237625|240960|244653|381107	Aqp4|Pltp|Dnaaf11|Dnali1|Ak7|Pla2g3|Dnah14|Hydin|Tmem232	-0.016	MyList
KEGG Pathway	24	mmu05322	Systemic lupus erythematosus - Mus musculus (house mouse)		-3.2	4.2	4.5	21222	150	270	8	3	1	14131|14960|50908|50909|68024|97114|319158|319179	Fcgr3|H2-Aa|C1s1|C1ra|H2bc4|H3c15|H4c9|H2bc6	-0.51	MyList
GO Molecular Functions	21	GO:0005506	iron ion binding		-2.7	3.6	3.9	21222	174	270	8	3	1	11684|11686|11689|12642|13078|15122|16819|22436	Alox12|Alox12b|Alox5|Ch25h|Cyp1b1|Hba-a1|Lcn2|Xdh	-0.32	MyList
GO Biological Processes	19	GO:0032370	positive regulation of lipid transport	19_GO:0051179 localization	-4.5	6.5	6.1	21222	97	270	8	3	1	13614|14419|18095|18429|18830|20750|217258|237625	Edn1|Gal|Nkx3-1|Oxt|Pltp|Spp1|Abca8a|Pla2g3	-1.2	MyList
GO Biological Processes	19	GO:1905954	positive regulation of lipid localization	19_GO:0051179 localization	-3.9	5.5	5.5	21222	115	270	8	3	1	13614|14419|18095|18429|18830|20750|217258|237625	Edn1|Gal|Nkx3-1|Oxt|Pltp|Spp1|Abca8a|Pla2g3	-0.82	MyList
GO Biological Processes	19	GO:0009746	response to hexose	19_GO:0050896 response to stimulus	-2.8	3.7	4	21222	169	270	8	3	1	11829|12834|14623|14652|15894|16819|56338|56485	Aqp4|Col6a2|Gjb6|Glp1r|Icam1|Lcn2|Txnip|Slc2a5	-0.36	MyList
GO Biological Processes	19	GO:0007623	circadian rhythm	19_GO:0048511 rhythmic process	-2.8	3.7	4	21222	171	270	8	3	1	12952|13490|14102|16476|18053|20264|50501|246313	Cry1|Drd3|Fas|Jun|Ngfr|Scn10a|Prok2|Prokr2	-0.34	MyList
GO Biological Processes	19	GO:0009266	response to temperature stimulus	19_GO:0050896 response to stimulus	-2.6	3.5	3.8	21222	181	270	8	3	1	12696|15360|18053|19652|20264|20840|60599|381359	Cirbp|Hmgcs2|Ngfr|Rbm3|Scn10a|Stac|Trp53inp1|Prdm12	-0.25	MyList
GO Biological Processes	19	GO:0000302	response to reactive oxygen species	19_GO:0050896 response to stimulus	-2.4	3.2	3.5	21222	198	270	8	3	1	11815|13078|13614|16476|16819|18124|20533|56338	Apod|Cyp1b1|Edn1|Jun|Lcn2|Nr4a3|Slc4a1|Txnip	-0.16	MyList
GO Biological Processes	19	GO:0055001	muscle cell development	19_GO:0032502 developmental process	-2.3	3.1	3.4	21222	206	270	8	3	1	11443|21956|22410|68760|72330|109272|225288|100534273	Chrnb1|Tnnt2|Wnt10b|Synpo2l|Klhl40|Mybpc1|Fhod3|Fer1l5	-0.13	MyList
GO Biological Processes	19	GO:0008016	regulation of heart contraction	19_GO:0032501 multicellular organismal process	-2.3	3.1	3.4	21222	206	270	8	3	1	11486|13614|14652|18429|20264|21956|74318|433809	Ada|Edn1|Glp1r|Oxt|Scn10a|Tnnt2|Hopx|Rnf207	-0.13	MyList
GO Biological Processes	19	GO:0046887	positive regulation of hormone secretion	19_GO:0051179 localization	-2.3	3.1	3.4	21222	206	270	8	3	1	13447|13614|14419|14652|18095|20750|66259|237625	Doc2b|Edn1|Gal|Glp1r|Nkx3-1|Spp1|Camk2n1|Pla2g3	-0.13	MyList
GO Biological Processes	19	GO:0006936	muscle contraction	19_GO:0032501 multicellular organismal process	-2.2	3	3.3	21222	211	270	8	3	1	11443|11486|13614|17883|20840|21956|68949|109272	Chrnb1|Ada|Edn1|Myh3|Stac|Tnnt2|Zfas1|Mybpc1	-0.11	MyList
Reactome Gene Sets	6	R-MMU-9759476	Regulation of Homotypic Cell-Cell Adhesion		-2.2	3.2	3.3	21222	173	270	7	2.6	0.97	11492|57875|68024|97114|110751|319158|319179	Adam19|Angptl4|H2bc4|H3c15|Adam33|H4c9|H2bc6	-0.063	MyList
Reactome Gene Sets	6	R-MMU-375276	Peptide ligand-binding receptors		-2	3	3.1	21222	184	270	7	2.6	0.97	13614|14419|18429|20295|50501|59289|246313	Edn1|Gal|Oxt|Ccl17|Prok2|Ackr2|Prokr2	-0.018	MyList
KEGG Pathway	24	mmu04640	Hematopoietic cell lineage - Mus musculus (house mouse)		-3.7	5.9	5.4	21222	94	270	7	2.6	0.97	12475|12490|12516|14960|16190|16194|22042	Cd14|Cd34|Cd7|H2-Aa|Il4ra|Il6ra|Tfrc	-0.72	MyList
KEGG Pathway	24	mmu04145	Phagosome - Mus musculus (house mouse)		-2	3	3.1	21222	183	270	7	2.6	0.97	12475|14131|14960|21826|22042|50909|73710	Cd14|Fcgr3|H2-Aa|Thbs2|Tfrc|C1ra|Tubb2b	-0.023	MyList
GO Molecular Functions	21	GO:0044325	transmembrane transporter binding		-2	3	3.1	21222	184	270	7	2.6	0.97	20264|20840|53881|68949|76905|433809|100503068	Scn10a|Stac|Slc5a3|Zfas1|Lrg1|Rnf207|Smim43	-0.018	MyList
GO Biological Processes	19	GO:0042542	response to hydrogen peroxide	19_GO:0050896 response to stimulus	-3	4.5	4.4	21222	122	270	7	2.6	0.97	13078|13614|16476|16819|18124|20533|56338	Cyp1b1|Edn1|Jun|Lcn2|Nr4a3|Slc4a1|Txnip	-0.42	MyList
GO Biological Processes	19	GO:0071383	cellular response to steroid hormone stimulus	19_GO:0050896 response to stimulus	-2.5	3.6	3.7	21222	152	270	7	2.6	0.97	13614|15360|18095|18600|20393|71760|268709	Edn1|Hmgcs2|Nkx3-1|Padi2|Sgk1|Etnppl|Fam107a	-0.19	MyList
GO Biological Processes	19	GO:0045471	response to ethanol	19_GO:0050896 response to stimulus	-2.2	3.3	3.4	21222	168	270	7	2.6	0.97	12475|12741|13490|14419|15360|16476|60599	Cd14|Cldn5|Drd3|Gal|Hmgcs2|Jun|Trp53inp1	-0.11	MyList
GO Biological Processes	19	GO:0006937	regulation of muscle contraction	19_GO:0032501 multicellular organismal process	-2.1	3.1	3.2	21222	175	270	7	2.6	0.97	11486|13614|18429|20264|21956|50501|433809	Ada|Edn1|Oxt|Scn10a|Tnnt2|Prok2|Rnf207	-0.047	MyList
GO Biological Processes	19	GO:2001235	positive regulation of apoptotic signaling pathway	19_GO:0048518 positive regulation of biological process	-2.1	3.1	3.2	21222	178	270	7	2.6	0.97	11684|14102|16476|18053|18095|58801|107449	Alox12|Fas|Jun|Ngfr|Nkx3-1|Pmaip1|Unc5b	-0.038	MyList
GO Biological Processes	19	GO:0050728	negative regulation of inflammatory response	19_GO:0048519 negative regulation of biological process	-2	3	3.1	21222	184	270	7	2.6	0.97	11486|11689|12702|13024|15937|101613|574402	Ada|Alox5|Socs3|Ctla2a|Ier3|Nlrp6|Gpr17	-0.018	MyList
GO Biological Processes	19	GO:0045766	positive regulation of angiogenesis	19_GO:0032502 developmental process	-2	3	3	21222	186	270	7	2.6	0.97	11745|12490|13078|13731|18186|21817|76905	Anxa3|Cd34|Cyp1b1|Emp2|Nrp1|Tgm2|Lrg1	-0.016	MyList
GO Biological Processes	19	GO:0031099	regeneration	19_GO:0032502 developmental process	-2	3	3	21222	186	270	7	2.6	0.97	11815|12575|14102|14580|16476|22410|29862	Apod|Cdkn1a|Fas|Gfap|Jun|Wnt10b|Ninj2	-0.016	MyList
GO Cellular Components	20	GO:0042383	sarcolemma		-2	3	3.1	21222	184	270	7	2.6	0.97	11684|11689|11829|12834|14102|20840|56485	Alox12|Alox5|Aqp4|Col6a2|Fas|Stac|Slc2a5	-0.018	MyList
GO Molecular Functions	21	GO:0016209	antioxidant activity		-3.1	5.5	4.8	21222	85	270	6	2.2	0.9	12870|15122|60599|110257|100503605|101488143	Cp|Hba-a1|Trp53inp1|Hba-a2|Hbb-bs|Hbb-bt	-0.48	MyList
GO Molecular Functions	21	GO:0016810	hydrolase activity, acting on carbon-nitrogen (but not peptide) bonds		-2.3	3.9	3.6	21222	121	270	6	2.2	0.9	11434|11486|18600|21817|80287|230379	Acr|Ada|Padi2|Tgm2|Apobec3|Acer2	-0.13	MyList
GO Molecular Functions	21	GO:0015108	chloride transmembrane transporter activity		-2.1	3.5	3.3	21222	133	270	6	2.2	0.9	14395|14409|14411|14412|20533|224661	Gabra2|Gabrr2|Slc6a12|Slc6a13|Slc4a1|Slc26a8	-0.047	MyList
Reactome Gene Sets	6	R-MMU-381426	Regulation of Insulin-like Growth Factor (IGF) transport and uptake by Insulin-like Growth Factor Binding Proteins (IGFBPs)		-2.4	4	3.7	21222	119	270	6	2.2	0.9	12870|16425|20750|29817|56047|66853	Cp|Itih2|Spp1|Igfbp7|Msln|Pnpla2	-0.15	MyList
Reactome Gene Sets	6	R-MMU-8957275	Post-translational protein phosphorylation		-2.5	4.2	3.8	21222	113	270	6	2.2	0.9	12870|16425|20750|29817|56047|66853	Cp|Itih2|Spp1|Igfbp7|Msln|Pnpla2	-0.19	MyList
GO Biological Processes	19	GO:0002526	acute inflammatory response	19_GO:0050896 response to stimulus	-3.2	5.7	4.9	21222	83	270	6	2.2	0.9	14131|15894|16819|22042|22371|101613	Fcgr3|Icam1|Lcn2|Tfrc|Vwf|Nlrp6	-0.51	MyList
GO Biological Processes	19	GO:0002444	myeloid leukocyte mediated immunity	19_GO:0002376 immune system process	-3.4	6.4	5.3	21222	74	270	6	2.2	0.9	11745|14131|18124|19215|101613|237625	Anxa3|Fcgr3|Nr4a3|Ptgds|Nlrp6|Pla2g3	-0.58	MyList
KEGG Pathway	24	mmu00590	Arachidonic acid metabolism - Mus musculus (house mouse)		-3	5.3	4.6	21222	89	270	6	2.2	0.9	11684|11686|11689|19215|237625|329502	Alox12|Alox12b|Alox5|Ptgds|Pla2g3|Pla2g4e	-0.42	MyList
GO Biological Processes	19	GO:2000379	positive regulation of reactive oxygen species metabolic process	19_GO:0048518 positive regulation of biological process	-3.1	5.6	4.8	21222	84	270	6	2.2	0.9	11684|12575|13078|14102|16819|53881	Alox12|Cdkn1a|Cyp1b1|Fas|Lcn2|Slc5a3	-0.5	MyList
GO Biological Processes	19	GO:0048661	positive regulation of smooth muscle cell proliferation	19_GO:0048518 positive regulation of biological process	-2.3	3.9	3.6	21222	122	270	6	2.2	0.9	11684|13614|16194|16476|18124|21817	Alox12|Edn1|Il6ra|Jun|Nr4a3|Tgm2	-0.13	MyList
GO Biological Processes	19	GO:0062014	negative regulation of small molecule metabolic process	19_GO:0048519 negative regulation of biological process	-2.1	3.5	3.3	21222	135	270	6	2.2	0.9	12642|12952|15937|20533|55990|57875	Ch25h|Cry1|Ier3|Slc4a1|Fmo2|Angptl4	-0.043	MyList
GO Biological Processes	19	GO:0001952	regulation of cell-matrix adhesion	19_GO:0050789 regulation of biological process	-2.1	3.4	3.2	21222	138	270	6	2.2	0.9	11815|12182|13731|18186|230379|268709	Apod|Bst1|Emp2|Nrp1|Acer2|Fam107a	-0.023	MyList
GO Biological Processes	19	GO:1901890	positive regulation of cell junction assembly	19_GO:0048518 positive regulation of biological process	-2	3.4	3.2	21222	140	270	6	2.2	0.9	12741|18186|18429|21826|74318|105827	Cldn5|Nrp1|Oxt|Thbs2|Hopx|Amigo2	-0.023	MyList
GO Biological Processes	19	GO:0032989	cellular anatomical entity morphogenesis	19_GO:0009987 cellular process	-2	3.4	3.2	21222	140	270	6	2.2	0.9	21956|22239|68760|109272|225288|237625	Tnnt2|Ugt8a|Synpo2l|Mybpc1|Fhod3|Pla2g3	-0.023	MyList
KEGG Pathway	24	mmu05143	African trypanosomiasis - Mus musculus (house mouse)		-5	12	7.9	21222	39	270	6	2.2	0.9	14102|15122|15894|110257|100503605|101488143	Fas|Hba-a1|Icam1|Hba-a2|Hbb-bs|Hbb-bt	-1.5	MyList
GO Biological Processes	19	GO:0010927	cellular component assembly involved in morphogenesis	19_GO:0032502 developmental process	-2	3.4	3.2	21222	140	270	6	2.2	0.9	21956|22239|68760|109272|225288|237625	Tnnt2|Ugt8a|Synpo2l|Mybpc1|Fhod3|Pla2g3	-0.023	MyList
GO Biological Processes	19	GO:0003073	regulation of systemic arterial blood pressure	19_GO:0032501 multicellular organismal process	-2	3.3	3.2	21222	142	270	6	2.2	0.9	13490|13614|13731|15937|56485|66259	Drd3|Edn1|Emp2|Ier3|Slc2a5|Camk2n1	-0.016	MyList
KEGG Pathway	24	mmu05144	Malaria - Mus musculus (house mouse)		-3.3	6.1	5.1	21222	77	270	6	2.2	0.9	15122|15894|21826|110257|100503605|101488143	Hba-a1|Icam1|Thbs2|Hba-a2|Hbb-bs|Hbb-bt	-0.58	MyList
KEGG Pathway	24	mmu04066	HIF-1 signaling pathway - Mus musculus (house mouse)		-2.4	4	3.7	21222	117	270	6	2.2	0.9	12575|13614|14433|16194|22042|212032	Cdkn1a|Edn1|Gapdh|Il6ra|Tfrc|Hk3	-0.16	MyList
KEGG Pathway	24	mmu05150	Staphylococcus aureus infection - Mus musculus (house mouse)		-2.2	3.7	3.5	21222	128	270	6	2.2	0.9	12628|14131|14960|15894|50908|50909	Cfh|Fcgr3|H2-Aa|Icam1|C1s1|C1ra	-0.098	MyList
GO Molecular Functions	21	GO:0004601	peroxidase activity		-3.1	6.8	5	21222	58	270	5	1.9	0.82	12870|15122|110257|100503605|101488143	Cp|Hba-a1|Hba-a2|Hbb-bs|Hbb-bt	-0.45	MyList
Reactome Gene Sets	6	R-MMU-2142753	Arachidonate metabolism		-3	6.5	4.9	21222	60	270	5	1.9	0.82	11684|11686|11689|13078|19215	Alox12|Alox12b|Alox5|Cyp1b1|Ptgds	-0.42	MyList
GO Molecular Functions	21	GO:0016684	oxidoreductase activity, acting on peroxide as acceptor		-3	6.5	4.9	21222	60	270	5	1.9	0.82	12870|15122|110257|100503605|101488143	Cp|Hba-a1|Hba-a2|Hbb-bs|Hbb-bt	-0.42	MyList
Reactome Gene Sets	6	R-MMU-216083	Integrin cell surface interactions		-2.8	5.8	4.5	21222	68	270	5	1.9	0.82	12831|12834|15894|20750|22371	Col5a1|Col6a2|Icam1|Spp1|Vwf	-0.32	MyList
Reactome Gene Sets	6	R-MMU-425366	Transport of bile salts and organic acids, metal ions and amine compounds		-2.6	5.3	4.2	21222	74	270	5	1.9	0.82	12870|14412|27411|53881|102680	Cp|Slc6a13|Slc14a2|Slc5a3|Slc6a20a	-0.23	MyList
GO Molecular Functions	21	GO:0015459	potassium channel regulator activity		-2.8	5.9	4.5	21222	67	270	5	1.9	0.82	18301|20393|53881|76905|170755	Fxyd5|Sgk1|Slc5a3|Lrg1|Sgk3	-0.34	MyList
GO Molecular Functions	21	GO:0051213	dioxygenase activity		-2.2	4.2	3.5	21222	93	270	5	1.9	0.82	11684|11686|11689|67014|227696	Alox12|Alox12b|Alox5|Riox2|Phyhd1	-0.065	MyList
GO Biological Processes	19	GO:1903426	regulation of reactive oxygen species biosynthetic process	19_GO:0050789 regulation of biological process	-3.3	7.4	5.3	21222	53	270	5	1.9	0.82	11684|11689|14102|16819|53881	Alox12|Alox5|Fas|Lcn2|Slc5a3	-0.52	MyList
GO Biological Processes	19	GO:0048821	erythrocyte development	19_GO:0042592 homeostatic process	-2.9	6.2	4.7	21222	63	270	5	1.9	0.82	11656|15122|20533|110257|101488143	Alas2|Hba-a1|Slc4a1|Hba-a2|Hbb-bt	-0.38	MyList
GO Biological Processes	19	GO:0051899	membrane depolarization	19_GO:0065007 biological regulation	-2.8	5.8	4.5	21222	68	270	5	1.9	0.82	11443|12789|13614|16476|20264	Chrnb1|Cnga2|Edn1|Jun|Scn10a	-0.32	MyList
GO Biological Processes	19	GO:0071384	cellular response to corticosteroid stimulus	19_GO:0050896 response to stimulus	-2.4	4.9	4	21222	80	270	5	1.9	0.82	13614|15360|20393|71760|268709	Edn1|Hmgcs2|Sgk1|Etnppl|Fam107a	-0.18	MyList
GO Biological Processes	19	GO:0007589	body fluid secretion	19_GO:0051179 localization	-2.4	4.9	3.9	21222	81	270	5	1.9	0.82	11486|11829|13614|15562|22436	Ada|Aqp4|Edn1|Htr4|Xdh	-0.17	MyList
GO Molecular Functions	21	GO:0004620	phospholipase activity		-2.1	4	3.4	21222	99	270	5	1.9	0.82	16816|66853|85031|237625|329502	Lcat|Pnpla2|Pla1a|Pla2g3|Pla2g4e	-0.023	MyList
GO Biological Processes	19	GO:0019369	arachidonate metabolic process	19_GO:0009987 cellular process	-2.2	4.3	3.6	21222	92	270	5	1.9	0.82	11684|11686|11689|13078|19215	Alox12|Alox12b|Alox5|Cyp1b1|Ptgds	-0.079	MyList
GO Molecular Functions	21	GO:0030594	neurotransmitter receptor activity		-2.1	4.1	3.4	21222	96	270	5	1.9	0.82	11443|13490|14395|14409|15562	Chrnb1|Drd3|Gabra2|Gabrr2|Htr4	-0.043	MyList
KEGG Pathway	24	mmu00564	Glycerophospholipid metabolism - Mus musculus (house mouse)		-2	3.9	3.3	21222	101	270	5	1.9	0.82	16816|71760|85031|237625|329502	Lcat|Etnppl|Pla1a|Pla2g3|Pla2g4e	-0.017	MyList
KEGG Pathway	24	mmu03320	PPAR signaling pathway - Mus musculus (house mouse)		-2.3	4.4	3.7	21222	89	270	5	1.9	0.82	12140|15360|18830|57435|57875	Fabp7|Hmgcs2|Pltp|Plin4|Angptl4	-0.11	MyList
GO Cellular Components	20	GO:0005833	hemoglobin complex		-4.8	24	9.5	21222	13	270	4	1.5	0.74	15122|110257|100503605|101488143	Hba-a1|Hba-a2|Hbb-bs|Hbb-bt	-1.3	MyList
GO Cellular Components	20	GO:0031838	haptoglobin-hemoglobin complex		-4.6	22	9.1	21222	14	270	4	1.5	0.74	15122|110257|100503605|101488143	Hba-a1|Hba-a2|Hbb-bs|Hbb-bt	-1.3	MyList
Reactome Gene Sets	6	R-MMU-1442490	Collagen degradation		-2.4	6.2	4.2	21222	51	270	4	1.5	0.74	12815|12831|12834|17388	Col11a2|Col5a1|Col6a2|Mmp15	-0.16	MyList
Reactome Gene Sets	6	R-MMU-186797	Signaling by PDGF		-2.3	5.9	4.1	21222	53	270	4	1.5	0.74	12831|12834|20750|21826	Col5a1|Col6a2|Spp1|Thbs2	-0.13	MyList
Reactome Gene Sets	6	R-MMU-917937	Iron uptake and transport		-2.3	5.6	3.9	21222	56	270	4	1.5	0.74	12870|16819|22042|52466	Cp|Lcn2|Tfrc|Slc46a1	-0.11	MyList
Reactome Gene Sets	6	R-MMU-1650814	Collagen biosynthesis and modifying enzymes		-2.3	5.6	3.9	21222	56	270	4	1.5	0.74	12406|12815|12831|12834	Serpinh1|Col11a2|Col5a1|Col6a2	-0.11	MyList
GO Molecular Functions	21	GO:0031720	haptoglobin binding		-6.1	45	13	21222	7	270	4	1.5	0.74	15122|110257|100503605|101488143	Hba-a1|Hba-a2|Hbb-bs|Hbb-bt	-1.9	MyList
GO Biological Processes	19	GO:0019372	lipoxygenase pathway	19_GO:0009987 cellular process	-5.1	29	10	21222	11	270	4	1.5	0.74	11684|11686|11689|237625	Alox12|Alox12b|Alox5|Pla2g3	-1.5	MyList
GO Biological Processes	19	GO:0070255	regulation of mucus secretion	19_GO:0051179 localization	-4.5	21	8.8	21222	15	270	4	1.5	0.74	11486|11686|83671|101613	Ada|Alox12b|Sytl2|Nlrp6	-1.2	MyList
GO Biological Processes	19	GO:0033762	response to glucagon	19_GO:0050896 response to stimulus	-3.8	14	7.1	21222	22	270	4	1.5	0.74	12952|14652|15360|93896	Cry1|Glp1r|Hmgcs2|Glp2r	-0.75	MyList
GO Biological Processes	19	GO:0042481	regulation of odontogenesis	19_GO:0032502 developmental process	-3.7	14	6.9	21222	23	270	4	1.5	0.74	12490|13614|18053|22409	Cd34|Edn1|Ngfr|Wnt10a	-0.72	MyList
GO Biological Processes	19	GO:1903428	positive regulation of reactive oxygen species biosynthetic process	19_GO:0048518 positive regulation of biological process	-3.6	13	6.6	21222	25	270	4	1.5	0.74	11684|14102|16819|53881	Alox12|Fas|Lcn2|Slc5a3	-0.66	MyList
GO Biological Processes	19	GO:2000831	regulation of steroid hormone secretion	19_GO:0051179 localization	-3.3	10	5.9	21222	30	270	4	1.5	0.74	12952|14419|18095|20750	Cry1|Gal|Nkx3-1|Spp1	-0.53	MyList
GO Biological Processes	19	GO:0045987	positive regulation of smooth muscle contraction	19_GO:0048518 positive regulation of biological process	-3	8.7	5.3	21222	36	270	4	1.5	0.74	11486|13614|18429|50501	Ada|Edn1|Oxt|Prok2	-0.39	MyList
GO Biological Processes	19	GO:0031102	neuron projection regeneration	19_GO:0032502 developmental process	-2.8	8.1	5	21222	39	270	4	1.5	0.74	11815|14102|14580|16476	Apod|Fas|Gfap|Jun	-0.36	MyList
GO Biological Processes	19	GO:0015844	monoamine transport	19_GO:0051179 localization	-2.7	7.7	4.9	21222	41	270	4	1.5	0.74	14131|21817|22353|243328	Fcgr3|Tgm2|Vip|Slc29a4	-0.32	MyList
GO Biological Processes	19	GO:0045576	mast cell activation	19_GO:0002376 immune system process	-2.7	7.5	4.8	21222	42	270	4	1.5	0.74	14131|18124|19215|237625	Fcgr3|Nr4a3|Ptgds|Pla2g3	-0.28	MyList
GO Biological Processes	19	GO:0072337	modified amino acid transport	19_GO:0051179 localization	-2.7	7.3	4.7	21222	43	270	4	1.5	0.74	14411|14412|52466|102680	Slc6a12|Slc6a13|Slc46a1|Slc6a20a	-0.27	MyList
GO Biological Processes	19	GO:0071870	cellular response to catecholamine stimulus	19_GO:0050896 response to stimulus	-2.6	7.1	4.6	21222	44	270	4	1.5	0.74	13490|15562|18124|21817	Drd3|Htr4|Nr4a3|Tgm2	-0.25	MyList
GO Biological Processes	19	GO:0071868	cellular response to monoamine stimulus	19_GO:0050896 response to stimulus	-2.6	7	4.6	21222	45	270	4	1.5	0.74	13490|15562|18124|21817	Drd3|Htr4|Nr4a3|Tgm2	-0.23	MyList
GO Biological Processes	19	GO:0033574	response to testosterone	19_GO:0050896 response to stimulus	-2.6	6.8	4.5	21222	46	270	4	1.5	0.74	13614|15360|18095|20750	Edn1|Hmgcs2|Nkx3-1|Spp1	-0.22	MyList
GO Biological Processes	19	GO:0045214	sarcomere organization	19_GO:0032502 developmental process	-2.6	6.8	4.5	21222	46	270	4	1.5	0.74	21956|68760|109272|225288	Tnnt2|Synpo2l|Mybpc1|Fhod3	-0.22	MyList
GO Biological Processes	19	GO:0071869	response to catecholamine	19_GO:0050896 response to stimulus	-2.5	6.5	4.4	21222	48	270	4	1.5	0.74	13490|15562|18124|21817	Drd3|Htr4|Nr4a3|Tgm2	-0.19	MyList
GO Biological Processes	19	GO:0071867	response to monoamine	19_GO:0050896 response to stimulus	-2.4	6.3	4.2	21222	50	270	4	1.5	0.74	13490|15562|18124|21817	Drd3|Htr4|Nr4a3|Tgm2	-0.17	MyList
GO Biological Processes	19	GO:0050881	musculoskeletal movement	19_GO:0032501 multicellular organismal process	-2.4	6.3	4.2	21222	50	270	4	1.5	0.74	11443|13490|17883|20840	Chrnb1|Drd3|Myh3|Stac	-0.17	MyList
GO Biological Processes	19	GO:0002437	inflammatory response to antigenic stimulus	19_GO:0002376 immune system process	-2.4	6.3	4.2	21222	50	270	4	1.5	0.74	14131|15894|78801|101613	Fcgr3|Icam1|Ak7|Nlrp6	-0.17	MyList
GO Biological Processes	19	GO:0030890	positive regulation of B cell proliferation	19_GO:0002376 immune system process	-2.4	6.2	4.2	21222	51	270	4	1.5	0.74	11486|12182|12575|22042	Ada|Bst1|Cdkn1a|Tfrc	-0.16	MyList
GO Biological Processes	19	GO:0043299	leukocyte degranulation	19_GO:0002376 immune system process	-2.4	6.2	4.2	21222	51	270	4	1.5	0.74	11745|18124|19215|237625	Anxa3|Nr4a3|Ptgds|Pla2g3	-0.16	MyList
GO Biological Processes	19	GO:0050879	multicellular organismal movement	19_GO:0032501 multicellular organismal process	-2.3	5.8	4	21222	54	270	4	1.5	0.74	11443|13490|17883|20840	Chrnb1|Drd3|Myh3|Stac	-0.13	MyList
GO Biological Processes	19	GO:0003254	regulation of membrane depolarization	19_GO:0050789 regulation of biological process	-2.3	5.6	3.9	21222	56	270	4	1.5	0.74	11684|15168|18053|20264	Alox12|Hcn3|Ngfr|Scn10a	-0.11	MyList
GO Biological Processes	19	GO:0045933	positive regulation of muscle contraction	19_GO:0048518 positive regulation of biological process	-2.2	5.3	3.8	21222	59	270	4	1.5	0.74	11486|13614|18429|50501	Ada|Edn1|Oxt|Prok2	-0.065	MyList
GO Biological Processes	19	GO:0030199	collagen fibril organization	19_GO:0009987 cellular process	-2.1	5.2	3.7	21222	61	270	4	1.5	0.74	12406|12815|12831|13078	Serpinh1|Col11a2|Col5a1|Cyp1b1	-0.043	MyList
GO Biological Processes	19	GO:0044060	regulation of endocrine process	19_GO:0032501 multicellular organismal process	-2.1	5.1	3.6	21222	62	270	4	1.5	0.74	12952|14419|18095|20750	Cry1|Gal|Nkx3-1|Spp1	-0.033	MyList
GO Biological Processes	19	GO:0042220	response to cocaine	19_GO:0050896 response to stimulus	-2	4.8	3.5	21222	66	270	4	1.5	0.74	13490|14229|18429|21817	Drd3|Fkbp5|Oxt|Tgm2	-0.016	MyList
GO Molecular Functions	21	GO:0004623	phospholipase A2 activity		-3.1	9.2	5.5	21222	34	270	4	1.5	0.74	16816|66853|237625|329502	Lcat|Pnpla2|Pla2g3|Pla2g4e	-0.44	MyList
GO Biological Processes	19	GO:0032835	glomerulus development	19_GO:0032502 developmental process	-2	4.8	3.5	21222	66	270	4	1.5	0.74	12490|12628|13614|15223	Cd34|Cfh|Edn1|Foxj1	-0.016	MyList
GO Cellular Components	20	GO:0106139	symbiont cell surface		-2.5	9.8	4.9	21222	24	270	3	1.1	0.64	12628|50908|50909	Cfh|C1s1|C1ra	-0.19	MyList
Reactome Gene Sets	6	R-MMU-1247673	Erythrocytes take up oxygen and release carbon dioxide		-4	29	9.1	21222	8	270	3	1.1	0.64	20533|100503605|101488143	Slc4a1|Hbb-bs|Hbb-bt	-0.82	MyList
Reactome Gene Sets	6	R-MMU-9762292	Regulation of CDH11 function		-4	29	9.1	21222	8	270	3	1.1	0.64	11492|57875|110751	Adam19|Angptl4|Adam33	-0.82	MyList
Reactome Gene Sets	6	R-MMU-1480926	O2/CO2 exchange in erythrocytes		-3.4	20	7.3	21222	12	270	3	1.1	0.64	20533|100503605|101488143	Slc4a1|Hbb-bs|Hbb-bt	-0.58	MyList
GO Molecular Functions	21	GO:0004052	arachidonate 12(S)-lipoxygenase activity		-4.7	47	12	21222	5	270	3	1.1	0.64	11684|11686|11689	Alox12|Alox12b|Alox5	-1.3	MyList
Reactome Gene Sets	6	R-MMU-9764260	Regulation of Expression and Function of Type II Classical Cadherins		-3.4	20	7.3	21222	12	270	3	1.1	0.64	11492|57875|110751	Adam19|Angptl4|Adam33	-0.58	MyList
Reactome Gene Sets	6	R-MMU-9759475	Regulation of CDH11 Expression and Function		-3.4	20	7.3	21222	12	270	3	1.1	0.64	11492|57875|110751	Adam19|Angptl4|Adam33	-0.58	MyList
Reactome Gene Sets	6	R-MMU-1237044	Erythrocytes take up carbon dioxide and release oxygen		-3.4	20	7.3	21222	12	270	3	1.1	0.64	20533|100503605|101488143	Slc4a1|Hbb-bs|Hbb-bt	-0.58	MyList
GO Molecular Functions	21	GO:0030492	hemoglobin binding		-3.3	18	7	21222	13	270	3	1.1	0.64	20533|100503605|101488143	Slc4a1|Hbb-bs|Hbb-bt	-0.53	MyList
GO Molecular Functions	21	GO:0005520	insulin-like growth factor binding		-2.8	13	5.8	21222	18	270	3	1.1	0.64	29817|75426|107250	Igfbp7|Igfbpl1|Kazald1	-0.36	MyList
GO Molecular Functions	21	GO:0019825	oxygen binding		-2.6	11	5.2	21222	22	270	3	1.1	0.64	15122|100503605|101488143	Hba-a1|Hbb-bs|Hbb-bt	-0.23	MyList
GO Molecular Functions	21	GO:0005283	amino acid:sodium symporter activity		-2.5	9.8	4.9	21222	24	270	3	1.1	0.64	14411|14412|102680	Slc6a12|Slc6a13|Slc6a20a	-0.19	MyList
Reactome Gene Sets	6	R-MMU-9707616	Heme signaling		-3.4	20	7.3	21222	12	270	3	1.1	0.64	52466|100503605|101488143	Slc46a1|Hbb-bs|Hbb-bt	-0.58	MyList
Reactome Gene Sets	6	R-MMU-8963899	Plasma lipoprotein remodeling		-2.4	9.1	4.7	21222	26	270	3	1.1	0.64	16816|18830|57875	Lcat|Pltp|Angptl4	-0.15	MyList
GO Molecular Functions	21	GO:0016702	oxidoreductase activity, acting on single donors with incorporation of molecular oxygen, incorporation of two atoms of oxygen		-2.4	9.1	4.7	21222	26	270	3	1.1	0.64	11684|11686|11689	Alox12|Alox12b|Alox5	-0.15	MyList
GO Biological Processes	19	GO:0042482	positive regulation of odontogenesis	19_GO:0032502 developmental process	-3.8	26	8.6	21222	9	270	3	1.1	0.64	12490|13614|18053	Cd34|Edn1|Ngfr	-0.75	MyList
GO Biological Processes	19	GO:0060405	regulation of penile erection	19_GO:0022414 reproductive process	-3.5	21	7.7	21222	11	270	3	1.1	0.64	11486|18429|22353	Ada|Oxt|Vip	-0.62	MyList
GO Biological Processes	19	GO:0001905	activation of membrane attack complex	19_GO:0002376 immune system process	-3.4	20	7.3	21222	12	270	3	1.1	0.64	12628|50908|50909	Cfh|C1s1|C1ra	-0.58	MyList
GO Molecular Functions	21	GO:0016701	oxidoreductase activity, acting on single donors with incorporation of molecular oxygen		-2.3	8.7	4.6	21222	27	270	3	1.1	0.64	11684|11686|11689	Alox12|Alox12b|Alox5	-0.13	MyList
GO Molecular Functions	21	GO:0005184	neuropeptide hormone activity		-2.3	8.4	4.5	21222	28	270	3	1.1	0.64	14419|18429|22353	Gal|Oxt|Vip	-0.12	MyList
GO Cellular Components	20	GO:0044217	other organism part		-2.1	7.4	4.1	21222	32	270	3	1.1	0.64	12628|50908|50909	Cfh|C1s1|C1ra	-0.043	MyList
GO Biological Processes	19	GO:0032308	positive regulation of prostaglandin secretion	19_GO:0051179 localization	-3.1	16	6.5	21222	15	270	3	1.1	0.64	13614|18429|237625	Edn1|Oxt|Pla2g3	-0.45	MyList
GO Biological Processes	19	GO:2000833	positive regulation of steroid hormone secretion	19_GO:0051179 localization	-3	15	6.2	21222	16	270	3	1.1	0.64	14419|18095|20750	Gal|Nkx3-1|Spp1	-0.42	MyList
GO Biological Processes	19	GO:0009404	toxin metabolic process	19_GO:0009987 cellular process	-3	15	6.2	21222	16	270	3	1.1	0.64	13078|16816|55990	Cyp1b1|Lcat|Fmo2	-0.42	MyList
GO Biological Processes	19	GO:0051608	histamine transport	19_GO:0051179 localization	-2.9	14	6	21222	17	270	3	1.1	0.64	11486|13614|243328	Ada|Edn1|Slc29a4	-0.38	MyList
GO Biological Processes	19	GO:0032306	regulation of prostaglandin secretion	19_GO:0051179 localization	-2.9	14	6	21222	17	270	3	1.1	0.64	13614|18429|237625	Edn1|Oxt|Pla2g3	-0.38	MyList
GO Biological Processes	19	GO:0034375	high-density lipoprotein particle remodeling	19_GO:0032501 multicellular organismal process	-2.8	13	5.8	21222	18	270	3	1.1	0.64	16816|18830|237625	Lcat|Pltp|Pla2g3	-0.36	MyList
GO Biological Processes	19	GO:0002438	acute inflammatory response to antigenic stimulus	19_GO:0002376 immune system process	-2.7	12	5.5	21222	20	270	3	1.1	0.64	14131|15894|101613	Fcgr3|Icam1|Nlrp6	-0.28	MyList
GO Biological Processes	19	GO:0032305	positive regulation of icosanoid secretion	19_GO:0051179 localization	-2.6	11	5.2	21222	22	270	3	1.1	0.64	13614|18429|237625	Edn1|Oxt|Pla2g3	-0.23	MyList
GO Molecular Functions	21	GO:0160041	neuropeptide activity		-2.2	8.1	4.4	21222	29	270	3	1.1	0.64	14419|18429|22353	Gal|Oxt|Vip	-0.11	MyList
GO Biological Processes	19	GO:0051797	regulation of hair follicle development	19_GO:0032502 developmental process	-2.6	11	5.2	21222	22	270	3	1.1	0.64	14419|18053|22410	Gal|Ngfr|Wnt10b	-0.23	MyList
GO Biological Processes	19	GO:0061440	kidney vasculature development	19_GO:0032502 developmental process	-2.5	9.8	4.9	21222	24	270	3	1.1	0.64	12490|13614|18186	Cd34|Edn1|Nrp1	-0.19	MyList
GO Biological Processes	19	GO:0061437	renal system vasculature development	19_GO:0032502 developmental process	-2.5	9.8	4.9	21222	24	270	3	1.1	0.64	12490|13614|18186	Cd34|Edn1|Nrp1	-0.19	MyList
GO Molecular Functions	21	GO:0005416	amino acid:monoatomic cation symporter activity		-2.2	8.1	4.4	21222	29	270	3	1.1	0.64	14411|14412|102680	Slc6a12|Slc6a13|Slc6a20a	-0.11	MyList
Reactome Gene Sets	6	R-MMU-2022854	Keratan sulfate biosynthesis		-2.3	8.4	4.5	21222	28	270	3	1.1	0.64	14264|72297|116847	Fmod|B3gnt3|Prelp	-0.12	MyList
GO Biological Processes	19	GO:0001829	trophectodermal cell differentiation	19_GO:0032502 developmental process	-2.4	9.1	4.7	21222	26	270	3	1.1	0.64	11486|13813|74318	Ada|Eomes|Hopx	-0.15	MyList
GO Biological Processes	19	GO:0036296	response to increased oxygen levels	19_GO:0050896 response to stimulus	-2.4	9.1	4.7	21222	26	270	3	1.1	0.64	14102|16819|20533	Fas|Lcn2|Slc4a1	-0.15	MyList
GO Molecular Functions	21	GO:0072349	modified amino acid transmembrane transporter activity		-2.1	7.4	4.1	21222	32	270	3	1.1	0.64	14412|52466|102680	Slc6a13|Slc46a1|Slc6a20a	-0.043	MyList
GO Biological Processes	19	GO:0032303	regulation of icosanoid secretion	19_GO:0051179 localization	-2.3	8.7	4.6	21222	27	270	3	1.1	0.64	13614|18429|237625	Edn1|Oxt|Pla2g3	-0.13	MyList
GO Biological Processes	19	GO:0019755	one-carbon compound transport	19_GO:0051179 localization	-2.3	8.7	4.6	21222	27	270	3	1.1	0.64	11829|15122|27411	Aqp4|Hba-a1|Slc14a2	-0.13	MyList
GO Biological Processes	19	GO:2000193	positive regulation of fatty acid transport	19_GO:0051179 localization	-2.3	8.7	4.6	21222	27	270	3	1.1	0.64	13614|18429|237625	Edn1|Oxt|Pla2g3	-0.13	MyList
GO Biological Processes	19	GO:0015669	gas transport	19_GO:0051179 localization	-2.3	8.4	4.5	21222	28	270	3	1.1	0.64	11829|15122|101488143	Aqp4|Hba-a1|Hbb-bt	-0.12	MyList
GO Biological Processes	19	GO:0072010	glomerular epithelium development	19_GO:0032502 developmental process	-2.3	8.4	4.5	21222	28	270	3	1.1	0.64	12490|13614|15223	Cd34|Edn1|Foxj1	-0.12	MyList
GO Biological Processes	19	GO:0051937	catecholamine transport	19_GO:0051179 localization	-2.2	8.1	4.4	21222	29	270	3	1.1	0.64	21817|22353|243328	Tgm2|Vip|Slc29a4	-0.11	MyList
GO Biological Processes	19	GO:0035809	regulation of urine volume	19_GO:0032501 multicellular organismal process	-2.2	8.1	4.4	21222	29	270	3	1.1	0.64	13614|18429|20533	Edn1|Oxt|Slc4a1	-0.11	MyList
GO Biological Processes	19	GO:0046128	purine ribonucleoside metabolic process	19_GO:0009987 cellular process	-2.2	7.9	4.3	21222	30	270	3	1.1	0.64	11486|14431|22436	Ada|Gamt|Xdh	-0.079	MyList
GO Molecular Functions	21	GO:0042910	xenobiotic transmembrane transporter activity		-2.1	7.1	4	21222	33	270	3	1.1	0.64	52466|217258|243328	Slc46a1|Abca8a|Slc29a4	-0.027	MyList
GO Biological Processes	19	GO:0045187	regulation of circadian sleep/wake cycle, sleep	19_GO:0048511 rhythmic process	-2.2	7.9	4.3	21222	30	270	3	1.1	0.64	11486|13490|19215	Ada|Drd3|Ptgds	-0.079	MyList
GO Biological Processes	19	GO:0034369	plasma lipoprotein particle remodeling	19_GO:0032501 multicellular organismal process	-2.1	7.4	4.1	21222	32	270	3	1.1	0.64	16816|18830|237625	Lcat|Pltp|Pla2g3	-0.043	MyList
GO Biological Processes	19	GO:0009119	ribonucleoside metabolic process	19_GO:0009987 cellular process	-2.1	7.4	4.1	21222	32	270	3	1.1	0.64	11486|14431|22436	Ada|Gamt|Xdh	-0.043	MyList
GO Biological Processes	19	GO:0042634	regulation of hair cycle	19_GO:0032501 multicellular organismal process	-2.1	7.4	4.1	21222	32	270	3	1.1	0.64	14419|18053|22410	Gal|Ngfr|Wnt10b	-0.043	MyList
GO Biological Processes	19	GO:0034368	protein-lipid complex remodeling	19_GO:0009987 cellular process	-2.1	7.4	4.1	21222	32	270	3	1.1	0.64	16816|18830|237625	Lcat|Pltp|Pla2g3	-0.043	MyList
Reactome Gene Sets	6	R-MMU-6783589	Interleukin-6 family signaling		-2.6	11	5.2	21222	22	270	3	1.1	0.64	12702|16194|18414	Socs3|Il6ra|Osmr	-0.23	MyList
GO Molecular Functions	21	GO:0016769	transferase activity, transferring nitrogenous groups		-2	6.9	3.9	21222	34	270	3	1.1	0.64	14433|21817|71760	Gapdh|Tgm2|Etnppl	-0.023	MyList
Reactome Gene Sets	6	R-MMU-190861	Gap junction assembly		-2.2	7.6	4.2	21222	31	270	3	1.1	0.64	14623|73710|118454	Gjb6|Tubb2b|Gjc2	-0.053	MyList
Reactome Gene Sets	6	R-MMU-420092	Glucagon-type ligand receptors		-2.1	7.1	4	21222	33	270	3	1.1	0.64	14652|22353|93896	Glp1r|Vip|Glp2r	-0.027	MyList
GO Biological Processes	19	GO:0046688	response to copper ion	19_GO:0050896 response to stimulus	-2.1	7.1	4	21222	33	270	3	1.1	0.64	12870|16816|22042	Cp|Lcat|Tfrc	-0.027	MyList
GO Biological Processes	19	GO:0002279	mast cell activation involved in immune response	19_GO:0002376 immune system process	-2	6.9	3.9	21222	34	270	3	1.1	0.64	18124|19215|237625	Nr4a3|Ptgds|Pla2g3	-0.023	MyList
GO Biological Processes	19	GO:0007435	salivary gland morphogenesis	19_GO:0032502 developmental process	-2	6.9	3.9	21222	34	270	3	1.1	0.64	18095|18186|21817	Nkx3-1|Nrp1|Tgm2	-0.023	MyList
GO Biological Processes	19	GO:2001240	negative regulation of extrinsic apoptotic signaling pathway in absence of ligand	19_GO:0048519 negative regulation of biological process	-2	6.9	3.9	21222	34	270	3	1.1	0.64	14049|107449|170755	Eya2|Unc5b|Sgk3	-0.023	MyList
GO Biological Processes	19	GO:0007214	gamma-aminobutyric acid signaling pathway	19_GO:0050789 regulation of biological process	-2	6.9	3.9	21222	34	270	3	1.1	0.64	14395|14409|15562	Gabra2|Gabrr2|Htr4	-0.023	MyList
GO Biological Processes	19	GO:0034367	protein-containing complex remodeling	19_GO:0009987 cellular process	-2	6.9	3.9	21222	34	270	3	1.1	0.64	16816|18830|237625	Lcat|Pltp|Pla2g3	-0.023	MyList
GO Biological Processes	19	GO:1901099	negative regulation of signal transduction in absence of ligand	19_GO:0048519 negative regulation of biological process	-2	6.9	3.9	21222	34	270	3	1.1	0.64	14049|107449|170755	Eya2|Unc5b|Sgk3	-0.023	MyList
GO Biological Processes	19	GO:0043303	mast cell degranulation	19_GO:0002376 immune system process	-2	6.9	3.9	21222	34	270	3	1.1	0.64	18124|19215|237625	Nr4a3|Ptgds|Pla2g3	-0.023	MyList
GO Biological Processes	19	GO:0042749	regulation of circadian sleep/wake cycle	19_GO:0048511 rhythmic process	-2	6.9	3.9	21222	34	270	3	1.1	0.64	11486|13490|19215	Ada|Drd3|Ptgds	-0.023	MyList
GO Biological Processes	19	GO:0071354	cellular response to interleukin-6	19_GO:0050896 response to stimulus	-2	6.7	3.9	21222	35	270	3	1.1	0.64	12702|16194|16819	Socs3|Il6ra|Lcn2	-0.016	MyList
GO Biological Processes	19	GO:0016048	detection of temperature stimulus	19_GO:0050896 response to stimulus	-2	6.7	3.9	21222	35	270	3	1.1	0.64	18053|20264|381359	Ngfr|Scn10a|Prdm12	-0.016	MyList
GO Biological Processes	19	GO:0003009	skeletal muscle contraction	19_GO:0032501 multicellular organismal process	-2	6.7	3.9	21222	35	270	3	1.1	0.64	11443|17883|20840	Chrnb1|Myh3|Stac	-0.016	MyList
