# Supplementary material
Source: Research Square preprint supplement (doi:10.21203/rs.3.rs-9288348/v1)
Supplement: Supplementary file 7 [file e9f3398c532d86dbf8599df1.xlsx]

## Sheet: Table S3
Table S3: GSEA of hippocampal RNA-seq data from TAA (n = 5) versus control (n = 5) rats using the HALLMARK gene-set collection.
	ID	Description	setSize	enrichmentScore	NES	pvalue	p.adjust	qvalue	rank	leading_edge	core_enrichment
HALLMARK_INTERFERON_ALPHA_RESPONSE	HALLMARK_INTERFERON_ALPHA_RESPONSE	INTERFERON_ALPHA_RESPONSE	85	-0.531305	-1.9996	8.38507e-06	0.000209627	0.000119156	1818	tags=36%, list=13%, signal=32%	Elf1/Tap1/Casp8/Tent5a/Ube2l6/Ifit2/Sp110/Psmb8/Lap3/Trim21/Gbp2/Irf9/Parp14/Parp9/Ifi44/Ifi44l/Cxcl10/Oasl/RT1-M6-2/Cnp/Ifih1/Rsad2/Dhx58/Uba7/Bst2/Isg15/Mx2/Rtp4/Irf7/Usp18/Oas1a
HALLMARK_XENOBIOTIC_METABOLISM	HALLMARK_XENOBIOTIC_METABOLISM	XENOBIOTIC_METABOLISM	152	0.515382	1.8681	5.9403e-06	0.000209627	0.000119156	2597	tags=35%, list=19%, signal=29%	Ptges/Mt2A/Slc6a12/Serpine1/Pdk4/Rbp4/Upp1/Ptgds/Dcxr/Aox1/Il1r1/Cyp2e1/Ptgr1/Nqo1/Hmox1/Aldh3a1/Igfbp4/Hes6/Fmo3/Ndrg2/Hnf4a/Epha2/Pink1/Ddt/Smox/Aldh2/Ets2/Asl/Fbln1/Fmo1/Enpep/Spint2/Hsd11b1/Gcnt2/Ninj1/Xdh/Id2/Ppard/Gch1/Gabarapl1/Slc46a3/Plg/Gclc/Cyp4f1/Pgrmc1/Tnfrsf1a/Vtn/Acp1/Fas/Mccc2/Aco2/Slc1a5/Akr1c14
HALLMARK_MITOTIC_SPINDLE	HALLMARK_MITOTIC_SPINDLE	MITOTIC_SPINDLE	186	-0.414738	-1.74373	1.4425e-05	0.000240416	0.000136658	2427	tags=28%, list=18%, signal=24%	Arhgef12/Mid1ip1/Dst/Arhgef2/Cenpe/Kif5b/Nedd9/Vcl/Uxt/Wasf2/Pdlim5/Marcks/Cdc27/Ppp4r2/Sos1/Shroom2/Rapgef6/Myo9b/Cdc42bpa/Nek2/Ccdc88a/Mapre1/Llgl1/Arhgap5/Prex1/Nin/Ezr/Gsn/Smc4/Itsn1/Anln/Prc1/Dock4/Akap13/Rapgef5/Kif22/Epb41l2/Rasal2/Cdc42ep1/Cdk5rap2/Tubd1/Cep72/Mid1/Kif4a/Ndc80/Ttk/Dlgap5/Espl1/Kif11/Ect2/Myh9/Cenpf/Top2a
HALLMARK_G2M_CHECKPOINT	HALLMARK_G2M_CHECKPOINT	G2M_CHECKPOINT	179	-0.40817	-1.70871	4.60376e-05	0.00057547	0.000327109	2032	tags=28%, list=15%, signal=24%	Jpt1/Marcks/Cdc27/Ccnt1/Cul5/Nek2/Kmt5a/Nasp/Ccnf/Dmd/Kpna2/Ss18/Cdc7/Plk4/Map3k20/Ezh2/Rbm14/Top1/Smc4/E2f3/Bard1/Sfpq/Syncrip/Smc2/Prc1/Gins2/Ewsr1/Kif22/Mybl2/Wrn/Knl1/Cdc45/Rasal2/Ccna2/Cks2/Mcm5/Kif4a/Ndc80/Atrx/Ttk/Mcm3/Ccnd1/Espl1/Cdc20/Kif11/Gspt1/Aurkb/Troap/Cenpf/Top2a
HALLMARK_HYPOXIA	HALLMARK_HYPOXIA	HYPOXIA	178	0.464571	1.72095	8.55889e-05	0.000855889	0.000486505	1976	tags=28%, list=15%, signal=24%	Maff/Mt2A/Plaur/Cdkn1a/Serpine1/Slc2a3/Ier3/Adm/Lox/Angptl4/Cp/Tpbg/Zfp36/Tgm2/Dusp1/Srpx/Hmox1/Col5a1/Pygm/Anxa2/Ccn5/Aldoc/Akap12/Ppp1r15a/Slc2a1/Dpysl4/Ccn2/Rora/Fos/Bhlhe40/Errfi1/Tpi1/Kif5a/Pkp1/Nfil3/Gcnt2/Eno3/Gaa/Cited2/Foxo3/Inha/Ppargc1a/Ddit4/Ndst2/Pim1/Pgam2/Cavin1/Phkg1/Dcn/Cdkn1c
HALLMARK_INFLAMMATORY_RESPONSE	HALLMARK_INFLAMMATORY_RESPONSE	INFLAMMATORY_RESPONSE	153	0.463741	1.6829	0.000416042	0.00296273	0.00168408	962	tags=22%, list=7%, signal=21%	Il1b/Ndp/Osmr/Plaur/Cdkn1a/Sele/Serpine1/Il18rap/Adm/Cd14/Sphk1/Rgs1/Rgs16/Pvr/Tpbg/Vip/Ptger4/Icam1/Nfkbia/Il1r1/Cd40/Il4r/Slc28a2/Best1/Tnfrsf1b/Stab1/Ptger2/Sgms2/Timp1/Tacr3/Cd55/Edn1/Tnfaip6/Icam4
HALLMARK_IL2_STAT5_SIGNALING	HALLMARK_IL2_STAT5_SIGNALING	IL2_STAT5_SIGNALING	163	0.454332	1.66144	0.000474037	0.00296273	0.00168408	1735	tags=26%, list=13%, signal=23%	Selp/Maff/Slc2a3/Emp1/Map3k8/Rgs16/Tgm2/Irf6/Il4r/Plagl1/Coch/Gpx4/Ager/Penk/Tnfrsf1b/Bmp2/Tnfrsf4/Col6a1/Arl4a/Nfkbiz/Ptger2/Dhrs3/Rora/Cd83/Bhlhe40/Ifngr1/Tlr7/Fgl2/Anxa4/Scn9a/Ecm1/Muc1/Ahnak/Hopx/Nfil3/Cish/Myo1c/Eno3/Ckap4/Pou2f1/Plscr1/Pim1/Gabarapl1
HALLMARK_TNFA_SIGNALING_VIA_NFKB	HALLMARK_TNFA_SIGNALING_VIA_NFKB	TNFA_SIGNALING_VIA_NFKB	170	0.45056	1.65604	0.000377156	0.00296273	0.00168408	1083	tags=21%, list=8%, signal=20%	Il1b/Bcl3/Maff/Socs3/Plaur/Cdkn1a/Serpine1/Slc2a3/Birc3/Ier3/Map3k8/Sphk1/Ptger4/Icam1/Nfkbia/Zfp36/Dusp1/Sik1/Fosb/Klf4/Bmp2/F2rl1/Zc3h12a/Ppp1r15a/Sgk1/Tgif1/Plau/Edn1/Cd83/Fos/Tnfaip6/Bhlhe40/Junb/Gadd45a/Spsb1/Ets2
HALLMARK_KRAS_SIGNALING_UP	HALLMARK_KRAS_SIGNALING_UP	KRAS_SIGNALING_UP	165	0.426249	1.55828	0.00117771	0.00654282	0.00371908	934	tags=20%, list=7%, signal=19%	Il1b/Tnnt2/Aldh1a3/Plaur/Emp1/Birc3/Mpzl2/Rbp4/Aldh1a2/F13a1/Rgs16/Angptl4/Plvap/Tspan1/Prdm1/Tnfrsf1b/Klf4/Bmp2/Prkg2/Gpnmb/F2rl1/Gadd45g/Pcp4/Akap12/Plat/Ppp1r15a/Ace/Gabra3/Adgrl4/Flt4/Plau/Map4k1/Ctss
HALLMARK_UV_RESPONSE_UP	HALLMARK_UV_RESPONSE_UP	UV_RESPONSE_UP	143	0.450331	1.61943	0.00158681	0.00793404	0.00450988	1021	tags=15%, list=8%, signal=14%	Shox2/Sult1a1/Slc6a12/Selenow/Ret/Icam1/Nfkbia/Apom/C4bpb/Creg1/Prkcd/Hmox1/Fosb/Bmp2/Epcam/Fen1/Tacr3/Bid/Fos/Kcnh2/Junb
HALLMARK_COAGULATION	HALLMARK_COAGULATION	COAGULATION	98	0.478625	1.63701	0.00453862	0.0175458	0.00997339	901	tags=23%, list=7%, signal=22%	Mmp8/Maff/Serpine1/Fn1/Comp/Hmgcs2/Dpp4/Serpina1/Anxa1/Htra1/Ctsk/Cfd/Plat/Hnf4a/Pf4/Sparc/Lcn12/C8g/Timp3/Timp1/Serping1/Plau/Crip2
HALLMARK_KRAS_SIGNALING_DN	HALLMARK_KRAS_SIGNALING_DN	KRAS_SIGNALING_DN	123	0.443215	1.56568	0.00491282	0.0175458	0.00997339	1662	tags=29%, list=12%, signal=26%	Shox2/Tfap2b/Ptgfr/Stag3/Edar/Klhdc8a/Itih3/Wnt16/Grid2/Akr1b8/Tfcp2l1/Prodh1/Nphs1/P2ry4/Mx1/Zbtb16/Sgk1/Cntfr/Slc12a3/Idua/Edn1/Gprc5c/Coq8a/Slc5a5/Thnsl2/Fgfr3/Pkp1/Tnni3/Macroh2a2/Sncb/Egf/Selenop/Kcne2/Copz2/Krt1/Nr6a1
HALLMARK_APOPTOSIS	HALLMARK_APOPTOSIS	APOPTOSIS	144	0.434871	1.56345	0.00422764	0.0175458	0.00997339	2601	tags=35%, list=19%, signal=28%	Il1b/Cdkn1a/Emp1/Birc3/Ier3/Igfbp6/Cd14/Anxa1/Txnip/Pmaip1/Gpx4/Hmox1/Tspo/Tgfbr3/Hmgb2/Bmp2/Casp2/Plat/Timp3/Timp1/Aifm3/Mgmt/Bid/Casp4/Timp2/Gadd45a/Ifngr1/Casp9/Gpx1/Sqstm1/Satb1/Gch1/Gucy2d/Pak1/F2r/Lgals3/Pdgfrb/Dcn/Sod1/Btg2/Bcl2l11/Rnasel/Ifitm3/Hspb1/Psen2/Fas/Rhot2/Erbb2/Gpx3/Bcl2l1
HALLMARK_OXIDATIVE_PHOSPHORYLATION	HALLMARK_OXIDATIVE_PHOSPHORYLATION	OXIDATIVE_PHOSPHORYLATION	193	0.406773	1.51615	0.00485667	0.0175458	0.00997339	4766	tags=55%, list=35%, signal=36%	Pdk4/Gpx4/Bdh2/Echs1/Oxa1l/Acaa2/Ndufa6/Aldh6a1/Acat1/Fxn/Idh2/Acadsb/Phyh/Ldhb/Atp6v0e1/Mrpl15/Bckdha/Ndufs2/Ndufs7/Cd320/Uqcrc1/Fh/Iscu/Slc25a12/Cox7b/Ndufa1/Cox6a1/Idh3g/Aco2/Rhot2/Slc25a11/Cox8a/Ndufb4/Mrps15/Pdp1/Cox4i1/Eci1/Cox6c/Grpel1/Cox11/Slc25a3/Ndufb6/Ndufa9/Atp5mf/Acaa1a/Uqcrh/Slc25a4/Atp5po/Mdh1/Decr1/Cpt1a/Vdac2/Hspa9/Ech1/Idh3b/Gpi/Sdha/Ndufv2/Oat/Mrps30/Atp5f1b/Cox6b1/Ndufc2/Phb2…
HALLMARK_P53_PATHWAY	HALLMARK_P53_PATHWAY	P53_PATHWAY	170	0.403359	1.48255	0.00625149	0.0208383	0.0118449	3369	tags=38%, list=25%, signal=29%	Cdkn1a/Sdc1/Ier3/Upp1/Sphk1/Rgs16/Dcxr/Txnip/Tpd52l1/Hmox1/Osgin1/S100a10/Klf4/Bmp2/Stom/Zbtb16/Ppp1r15a/Epha2/St14/Fos/Coq8a/Gadd45a/Ctsf/Rxra/Sesn1/Eps8l2/Prkab1/Phlda3/Ninj1/Slc3a2/Gls2/Rps12/Foxo3/Rnf19b/Ddit4/F2r/Ldhb/Rchy1/Acvr1b/Rhbdf2/Btg2/Iscu/Abat/Plxnb2/Fas/Itgb4/Plk2/Ephx1/Pmm1/Ppm1d/Cdh13/Vamp8/Jag2/Mknk2/Cdkn2aip/Rpl18/Cgrrf1/Ifi30/Wrap73/Rack1/Rps27l/Ier5/Ada/Hdac3/Tspyl2
HALLMARK_EPITHELIAL_MESENCHYMAL_TRANSITION	HALLMARK_EPITHELIAL_MESENCHYMAL_TRANSITION	EPITHELIAL_MESENCHYMAL_TRANSITION	177	0.399619	1.47922	0.00874883	0.0273401	0.0155407	2101	tags=32%, list=16%, signal=28%	Plaur/Serpine1/Fn1/Sdc1/Comp/Lox/Postn/Pvr/Nnmt/Tgm2/Rgs4/Lamc2/Htra1/Mgp/Col5a1/Igfbp4/Tgfbr3/Col6a2/Foxc2/Sparc/Ccn2/Oxtr/Timp3/Col7a1/Timp1/Vegfc/Fstl3/Itgb5/Gadd45a/Vim/Sfrp1/Fbn2/Abi3bp/Col1a1/Lgals1/Dab2/Efemp2/Fbln1/Ecm1/Il15/Fap/Thbs1/Col3a1/Flna/Itga5/Lama1/Id2/Tpm4/Tpm2/Ntm/Bmp1/Pdgfrb/Dcn/Cdh6/Mcm7/PCOLCE2/Tnfrsf11b
HALLMARK_APICAL_SURFACE	HALLMARK_APICAL_SURFACE	APICAL_SURFACE	36	0.570749	1.63203	0.00999263	0.0293901	0.0167059	436	tags=19%, list=3%, signal=19%	Plaur/Slc2a4/Slc22a12/Efna5/Gstm5/Srpx/Atp8b1
HALLMARK_IL6_JAK_STAT3_SIGNALING	HALLMARK_IL6_JAK_STAT3_SIGNALING	IL6_JAK_STAT3_SIGNALING	65	0.509964	1.63456	0.0126658	0.0316646	0.0179988	1422	tags=26%, list=11%, signal=24%	Il1b/Socs3/Osmr/Csf2rb/Cd14/Map3k8/Il1r1/Il4r/Hmox1/Tnfrsf1b/Pf4/Cntfr/Ifngr1/Stat3/Lepr/Ptpn11/Il17ra
HALLMARK_MYOGENESIS	HALLMARK_MYOGENESIS	MYOGENESIS	160	0.394911	1.44353	0.0122549	0.0316646	0.0179988	1867	tags=27%, list=14%, signal=23%	Tnnt2/Cdkn1a/Bdkrb2/Sphk1/Pvalb/Mapk12/Tead4/Mef2c/Klf5/Cryab/Nqo1/Tpd52l1/Pygm/Sln/Ptp4a3/Cfd/Tnnt1/Col6a2/Sparc/Des/Fst/Chrnb1/Bhlhe40/Kcnh2/Itgb5/Casq2/Tnnc1/Lsp1/Fabp3/Col1a1/Myh3/Myo1c/Col3a1/Myom1/Sod3/Eno3/Gaa/Aebp1/Lpin1/Igfbp7/Pgam2/Tpm2/Sh3bgr
HALLMARK_ESTROGEN_RESPONSE_LATE	HALLMARK_ESTROGEN_RESPONSE_LATE	ESTROGEN_RESPONSE_LATE	171	0.389398	1.43213	0.0119648	0.0316646	0.0179988	2069	tags=29%, list=15%, signal=25%	S100a9/Ptges/Ovol2/Hmgcs2/Cdh1/Mapk13/Serpina1/Ret/Tpbg/Dcxr/Zfp36/Ass1/Lamc2/Clic3/Tpd52l1/Slc29a1/Foxc1/Igfbp4/Slc27a2/Th/Klf4/Cyp26b1/Ccn5/Atp2b4/Pcp4/Sgk1/St14/Opn3/Impa2/Fos/Fkbp5/Tnnc1/Fgfr3/Npy1r/Cish/Llgl2/Myof/Flnb/Idh2/Slc2a8/Id2/Prlr/Micb/Rab31/Rps6ka2/Kcnk5/Gale/Dnajc12/Cacna2d2
HALLMARK_COMPLEMENT	HALLMARK_COMPLEMENT	COMPLEMENT	153	0.38112	1.38307	0.0207172	0.0493266	0.0280383	1072	tags=16%, list=8%, signal=15%	S100a9/Mmp8/Maff/Plaur/Serpine1/Fn1/Fcnb/Dpp4/Serpina1/Cp/C1qc/Adra2b/C4bpb/Prkcd/Notch4/Plat/Hnf4a/Timp1/Serping1/Cd55/Ctss/Casp4/Timp2/Kcnip3/F5
